# Supplementary material
Source: PubMed Central journal article supplement (PMC9345882)

1 **Supplementary Information**

2

3 **Regulation of sclerostin by the SIRT1 stabilization pathway in osteocytes**

4 Jung-Min Kim<sup>1</sup>, Yeon-Suk Yang<sup>1</sup>, Jun Xie<sup>2,3,4</sup>, Oksun Lee<sup>1</sup>, JiHea Kim<sup>1</sup>, Jaehyoung Hong<sup>5</sup>,  
5 Brigitte Boldyreff<sup>6</sup>, Odile Filhol<sup>7</sup>, Hyonho Chun<sup>5</sup>, Matthew B. Greenblatt<sup>8,9</sup>, Guangping Gao<sup>2,3,4,10</sup>,  
6 and Jae-Hyuck Shim<sup>1,2,10</sup>

7 <sup>1</sup>Department of Medicine, University of Massachusetts Medical School, Worcester, MA 01605,  
8 USA

9 <sup>2</sup>Horae Gene Therapy Center, <sup>3</sup>Department of Microbiology and Physiological Systems, <sup>4</sup>Viral  
10 Vector Core, University of Massachusetts Medical School, Worcester, MA 01605, USA

11 <sup>5</sup>Department of Mathematical Sciences, Korea Advanced Institute of Science and Technology,  
12 Daejeon 34141, Republic of Korea

13 <sup>6</sup>KinaseDetect ApS, 6340 Krusaa, Denmark

14 <sup>7</sup>Interdisciplinary Research Institute of Grenoble, IRIG-Biosanté, University Grenoble Alpes,  
15 CEA, UMR 1292, F-38000 Grenoble, France

16 <sup>8</sup>Department of Pathology and Laboratory Medicine, Weill Cornell Medical College, New York,  
17 NY 10065, USA

18 <sup>9</sup>Hospital for Special Surgery, New York, NY 10021, USA

19 <sup>10</sup>Li Weibo Institute for Rare Diseases Research, University of Massachusetts Medical School,  
20 Worcester, MA 01605, USA

21

22 \*To whom correspondence should be addressed.

1 Jae-Hyuck Shim  
2 Department of Medicine/Division of Rheumatology,  
3 University of Massachusetts Medical School  
4 364 Plantation street, LRB217, Worcester, MA 01605  
5 E-mail: jaehyuck.shim@umassmed.edu

6

7 **Running title:** A CK2/USP4/SIRT1 pathway regulates sclerostin expression in osteocytes.

8

9

10

11

12

13

14

15

16

17

18

19

## Supplementary Table 1

| Construct                                    | Sequence                                                                                                                                                                                                                                                                                                                                                      |
|----------------------------------------------|---------------------------------------------------------------------------------------------------------------------------------------------------------------------------------------------------------------------------------------------------------------------------------------------------------------------------------------------------------------|
| (AspSerSer) <sub>6</sub>                     | GATTCATCAGATTCTTCTGATTCATCCGACTCTTCTGACAGTTCAGACAGC<br>TCT                                                                                                                                                                                                                                                                                                    |
| amiR-33-Ctrl<br>( <i>amiR-Ctrl</i> )         | TTTGTCTTTTATTTTCAGGTCCCAGATCTAGGGCTCTGCGTTTGTCTCCAGGTA<br>GTCCGCTGCTCCCTTGGGCCTGGGCCACTGACAGCCCTGGTGCCTCTGGC<br>CGGCTGCACACCTCCTGGCGGGCAGCTGTGTACAACTACTTGAGAGCAG<br>GTGTTCTGGCAATACCTGCCTGCTCTGTAATAGTTTGTACACGGAGGCCTG<br>CCCTGACTGCCACGGTGCCGTGGCCAAAGAGGATCTAAGGGCACCGCTG<br>AGGGCCTACCTAACCATCGTGGGGAATAAGGACAGTGTACCCCTGCAGG<br>GGATCCGGTGGTGGTGCAAATCA |
| EGFP-probe                                   | 6FAM-CGCGATCACATGGTCCTGCTGG-TAMRA                                                                                                                                                                                                                                                                                                                             |
| amiR-33-<br>mSost-1<br>( <i>amiR-Sost1</i> ) | ttgtcttttatttcaggtcccAGATCTAGGGCTCTGCGTTTGTCTCCAGGTAGTCCGCTGC<br>TCCCTTGGGCCTGGGCCACTGACAGCCCTGGTGCCTCTGGCCGGCTGCAC<br>ACCTCCTGGCGGGCAGCTGTGAcaagtaggcagatgaggcacTGTTCTGGCAATACC<br>TGGTGCCTCAAGTACCTACTTGTACGGAGGCCTGCCCTGACTGCCCACG<br>GTGCCGTGGCCAAAGAGGATCTAAGGGCACCGCTGAGGGCCTACCTAACC<br>ATCGTGGGGAATAAGGACAGTG TCACCCCTGCAGgggatccggtggtgcaaatca       |
| amiR-33-<br>mSost-2<br>( <i>amiR-Sost2</i> ) | ttgtcttttatttcaggtcccAGATCTAGGGCTCTGCGTTTGTCTCCAGGTAGTCCGCTGC<br>TCCCTTGGGCCTGGGCCACTGACAGCCCTGGTGCCTCTGGCCGGCTGCAC<br>ACCTCCTGGCGGGCAGCTGTGtagacctgtggcatattccTGTTCTGGCAATACCTG<br>GGAATGATCGCGCAGAGGTACACGGAGGCCTGCCCTGACTGCCCACGGT<br>GCCGTGGCCAAAGAGGATCTAAGGGCACCGCTGAGGGCCTACCTAACCAT<br>CGTGGGGAATAAGGACAGTGTACCCCTGCAGgggatccggtggtgcaaatca           |

**Supplementary Table 2**

| <b>Gene</b>                     | <b>Forward</b>           | <b>Reverse</b>             |
|---------------------------------|--------------------------|----------------------------|
| Mouse <i>Csnk2a1</i>            | TATGTGGAGCTTGGGTTGTATG   | CAAGATATCGTTGAAACGTGGA     |
| Mouse <i>Csnk2a2</i>            | CAACAATGAGAGGGTGGTTGTA   | TGACACAGGGTCCTTTACAGTG     |
| Mouse <i>Csnk2b</i>             | TCTTCTGTGAGGTGGATGAAGA   | CTCTTCATCAGGTTCCAGGTCT     |
| Mouse <i>Dmp1</i>               | GAAAGCTCTGAAGAGAGGACGG   | CCTCTCCAGATTCAGTCTGTC      |
| Mouse <i>Sost</i>               | CTTCAGGAATGATGCCACAGAGGT | ATCTTTGGCGTCATAGGGATGGTG   |
| Mouse <i>Phex</i>               | CTGGCTGTAAGGGAAGACTCCC   | GCTCCTAAAAGCACAGCAGTGTGTC  |
| Mouse <i>Tnfsf11</i><br>(RANKL) | CAGCATCGCTCTGTTCCCTGTA   | CTGCGTTTTTCATGGAGTCTCA     |
| Mouse <i>Tnfrsf11b</i><br>(OPG) | CGGAAACAGAGAAGCCACGCAA   | CTGTCCACCAAAACTCAGCC       |
| Mouse <i>Pdpr</i>               | GAGGAACTGTCCACCTCAGC     | CGTTTCATCCCCTGCATTAT       |
| Mouse <i>Mepe</i>               | GGGAAGGAAACCAGGAGAAG     | GGTGTGTTTGGTGTGTTTGC       |
| Mouse <i>Fgf23</i>              | CGTCATAGCCATTCTCCAGCGT   | AACAGGAGCCATGACTCGAAGG     |
| Mouse <i>Ibsp</i>               | CAGGGAGGCAGTACTCTTC      | AGTGTGGAAAGTGTGGCGTT       |
| Mouse <i>Bglap</i>              | GCAGCACAGGTCCTAAATAG     | GGGCAATAAGGTAGTGAACAG      |
| Mouse <i>Sp7</i>                | ATGGCGTCCTCTCTGCTTGA     | GAAGGGTGGGTAGTCATTG        |
| Mouse <i>Colla1</i>             | ACTGTCCCAACCCCAAAG       | ACGTATTCTCCGGGCAGAA        |
| Mouse <i>Axin2</i>              | GCAGATGAACCTGAAGGATACC   | TTGATGCCATCTCGTATGTAGG     |
| Mouse <i>Ctsk</i>               | AGCAGAACGGAGGCATTGACTC   | CCCTCTGCATTTAGCTGCCTTTG    |
| Mouse <i>Nfatc1</i>             | GGTGCCTTTTGGCAGCAGTATC   | CGTATGGACCAGAATGTGACGG     |
| Mouse <i>Acp5</i>               | GCGACCATTGTTAGCCACATACG  | CGTTGATGTGCGCACAGAGGGAT    |
| Mouse <i>Sirt1</i>              | GTCTCCTGTGGGATTCCTGA     | ACACAGAGACGGCTGGA ACT      |
| Mouse <i>Usp4</i>               | AGCACTGCAAAGTGGAAGTGTA   | GAGCTTCCTCATCTCCTTCTCA     |
| Mouse <i>Rplp0</i>              | TGGCCAATAAGGTGCCAGCTGCTG | CTTGCTCCAGTCTTTATCAGCTGCAC |

1 **Supplementary Figure Legends**

2 **Supplementary Fig. 1. The expression of CSNK2B in bone-residing osteoblasts and**  
3 **osteocytes.**

4 Cryosectioned femurs of 8-week-old wildtype mice were co-immunostained for CSNK2B (green)  
5 and osteocalcin (red) and or sclerostin (red) to detect mature osteoblasts (a) and osteocytes (b),  
6 respectively. DAPI was used for nuclear staining. Arrows indicate CSNK2B-expressing  
7 osteocalcin<sup>+</sup> osteoblasts (a) or sclerostin<sup>+</sup> osteocytes (b). BM, bone marrow; TB, trabecular bone;  
8 CB, cortical bone. Scale bar, 25 μm (a, b). Data are representative of two independent experiments.

9

10 **Supplementary Fig. 2. The expression of CSNK2B in DMP1-expressing osteoblasts and**  
11 **osteocytes.**

12 (a) GFP-expressing DMP1<sup>+</sup> osteoblasts and osteocytes in the cryosectioned femurs of eight-week-  
13 old *Dmp1;Rosa26<sup>mT/mG</sup>* mice were analyzed by fluorescence microscopy. DAPI was used for  
14 nuclear staining. Scale bar, 1 mm (left) and 400 μm (right).

15 (b) Cryosectioned femurs of 8-week-old *Dmp1;Rosa26<sup>mT/mG</sup>* mice were stained for CSNK2B (red)  
16 and CSNK2B-expressing GFP<sup>+</sup> osteoblasts and osteocytes were analyzed by fluorescence  
17 microscopy. Arrows indicate CSNK2B-expressing DMP1<sup>+</sup> osteoblasts and osteocytes that reside  
18 in the cortical bone (CB). Scale bar, 25 μm. Data are representative of two independent  
19 experiments.

20

1 **Supplementary Fig. 3. Histologic analyses for femoral bones of *Csnk2b<sup>fl/fl</sup>* and *Csnk2b<sup>Dmp1</sup>***  
2 **mice.**

3 (a) H&E staining of femoral sections of 8-week-old *Csnk2b<sup>fl/fl</sup>* and *Csnk2b<sup>Dmp1</sup>* male mice. Scale  
4 bar, 50  $\mu\text{m}$ .

5 (b) Immunohistochemistry for cathepsin k in 8-week-old *Csnk2b<sup>fl/fl</sup>* and *Csnk2b<sup>Dmp1</sup>* femurs. Arrow  
6 heads indicate cathepsin k<sup>+</sup> mature osteoclasts. M, muscle; CB, cortical bone. Scale bar, 50  $\mu\text{m}$ .

7 Data are representative of two independent experiments.

8

9 **Supplementary Fig. 4. The expression of osteocyte differentiation genes in *Csnk2b<sup>fl/fl</sup>* and**  
10 ***Csnk2b<sup>Dmp1</sup>* bones.**

11 mRNA levels of osteocyte marker genes in 8-week-old *Csnk2b<sup>fl/fl</sup>* and *Csnk2b<sup>Dmp1</sup>* tibias. Data are  
12 representative of three independent experiments. A two-tailed unpaired Student's t-test for  
13 comparing two groups (error bars, SD of biological replicates).

14

15 **Supplementary Fig. 5. Effect of a CK2 inhibitor on osteocyte differentiation *in vitro*.**

16 (a) Immunoblot for phospho-CK2 substrates in Ocy454 cells treated with vehicle (DMSO) or 0.1  
17  $\mu\text{M}$  of a CK2 inhibitor.

18 (b) mRNA levels of osteocyte marker genes in Ocy454 cells treated with vehicle (DMSO) or 0.1  
19  $\mu\text{M}$  of a CK2 inhibitor 6 days after osteocyte differentiation culture. Data are representative of two

1 independent experiments. A two-tailed unpaired Student's t-test for comparing two groups (b;  
2 error bars, SD of biological replicates).

3

4 **Supplementary Fig. 6. Effects of *Csnk2b* deficiency on late stage differentiation of mature**  
5 **osteoblasts.**

6 (a) Diagram of the study and treatment methods.

7 (b) mRNA levels of osteoblast genes in mature *Csnk2b<sup>fl/fl</sup>* calvarial osteoblasts (COBs) 6 days  
8 after osteogenic differentiation.

9 (c, d) *Csnk2b<sup>fl/fl</sup>* COBs were transduced with lentivirus encoding vector control (WT) or CRE  
10 recombinase ( $\Delta$ *Csnk2b*) 6 days after osteogenic culture, and then further differentiated up to 18  
11 days. Mineralization by alizarin red staining with quantification (c) and osteogenic markers  
12 expression (d) were determined. Data are representative of two independent experiments. Ordinary  
13 one-way ANOVA with Sidak's multiple comparisons test (b) or a two-tailed unpaired Student's t-  
14 test for comparing two groups (c, d) (b-d; error bars, SD of biological replicates).

15

16 **Supplementary Fig. 7. *Csnk2b<sup>Dmp1</sup>* mice display low bone mass.**

17 MicroCT analysis showing a decrease of femoral bone mass in 8-week-old *Csnk2b<sup>fl/fl</sup>* and  
18 *Csnk2b<sup>Dmp1</sup>* male (a; n=7) and female (b, c; n=5) mice. 3D-reconstruction images (a, b) and  
19 quantification (c) are displayed. Trabecular bone volume/total volume (Tb. BV/TV), trabecular  
20 thickness (Tb. Th), and cortical thickness (C. Th) were measured. Scale bar, 500  $\mu$ m (a, b). A two-  
21 tailed unpaired Student's t-test for comparing two groups (c; error bars, SD of biological replicates).

1

2 **Supplementary Fig. 8. Paracrine effects of *Csnk2b*-deficient osteoblasts on osteoblast and**  
3 **osteoclast differentiation.**

4 The CM harvested from *WT* or and  $\Delta$ *Csnk2b* mature osteoblasts (described in Supplementary Fig.  
5 6a) was added to osteogenic culture of wildtype bone marrow stromal cells (BMSCs) and 6 days  
6 later, ALP activity (a) and osteogenic gene expression (b) were analyzed. Alternatively, the CM  
7 was added to osteoclastogenic culture of wildtype bone marrow monocytes (BMMs) and 6 days  
8 later, osteoclast differentiation was assessed by TRAP staining (c), TRAP activity (d), and  
9 osteoclast gene expression (e). Scale bar, 200  $\mu$ m (c). Data are representative of two independent  
10 experiments. A two-tailed unpaired Student's t-test for comparing two groups (a, b, d, e; error bars,  
11 SD of biological replicates).

12

13 **Supplementary Fig. 9. The expression of osteocyte differentiation genes in *Csnk2b*-deficient**  
14 **osteocytes.**

15 mRNA levels of osteocyte marker genes in *shScr* or *shCsnk2b*-expressing Ocy454 cells 6 (a) or  
16 18 (b) days after osteocyte differentiation culture were assessed by RT-PCR. Data are  
17 representative of three independent experiments. A two-tailed unpaired Student's t-test for  
18 comparing two groups (a, b; error bars, SD of biological replicates).

19

20 **Supplementary Fig. 10. OPG-Fc treatment reverses the paracrine effects of *Csnk2b*-deficient**  
21 **osteocytes on osteoclast differentiation.**



1 (a-c) The conditioned medium (CM) was harvested from *shScr*- or *shCsnk2b*-expressing Ocy454  
2 cells and added to osteoclastogenic culture of wildtype BMMs in the absence or presence of OPG-  
3 Fc. 6 days later, osteoclast differentiation was assessed by TRAP staining (a), TRAP activity (b),  
4 and osteoclast gene expression (c). Scale bar, 200  $\mu\text{m}$  (a). Blue arrows, TRAP<sup>+</sup> multinucleated  
5 osteoclasts.

6 (d, e) Alternatively, the CM was added to osteogenic culture of wildtype BMSCs in the absence  
7 or the presence of OPG-Fc. 6 days later, ALP activity (d) and osteogenic gene expression (e) were  
8 analyzed. Data are representative of two independent experiments. A two-tailed unpaired Student's  
9 t-test for comparing two groups (b, c, d [*shScr* vs. *shCsnk2b*], e) or ordinary one-way ANOVA  
10 with Sidak's multiple comparisons test (d [vehicle vs. OPG-Fc]) (b-e; error bars, SD of biological  
11 replicates).

12

13 **Supplementary Fig. 11. Effects of a CK2 or USP4 inhibitor on SIRT1 ubiquitination.**

14 HEK293T cells expressing Flag-*SIRT1* and His-ubiquitin were treated with vehicle (DMSO), 0.1  
15  $\mu\text{M}$  CK2 inhibitor (a) or 100  $\mu\text{M}$  USP4 inhibitor (b). 2 days later, cells were treated with 10  $\mu\text{M}$   
16 MG132 for 6 hours and then lysed, pull-downed with Ni-NTA agarose, and immunoblotted with  
17 anti-SIRT1 antibody. Alternatively, Ni-NTA fractions were immunoblotted with an anti-ubiquitin  
18 antibody as a loading control.

19

20 **Supplementary Fig. 12. Identification of SIRT1-binding deubiquitinating enzymes.**

1 HEK293T cells expressing were transiently transfected with Flag-tagged DUBs and HA-ubiquitin  
2 and 2 days later, cells were treated with 10  $\mu$ M MG132 for 6 hours. Cells were lysed, pull-downed  
3 with Flag-conjugated agarose, and immunoblotted with SIRT1. Input controls were  
4 immunoblotted with FLAG or SIRT1.

5

6 **Supplementary Fig. 13. Loading control for total ubiquitinated proteins in *USP4*- or *USP22*-**  
7 **overexpressing cells.**

8 The Ni-NTA fractions used for Fig. 6b, c, and f were immunoblotted with anti-ubiquitin antibody  
9 as loading controls.

**a**

IF:CSNK2B/Osteocalcin

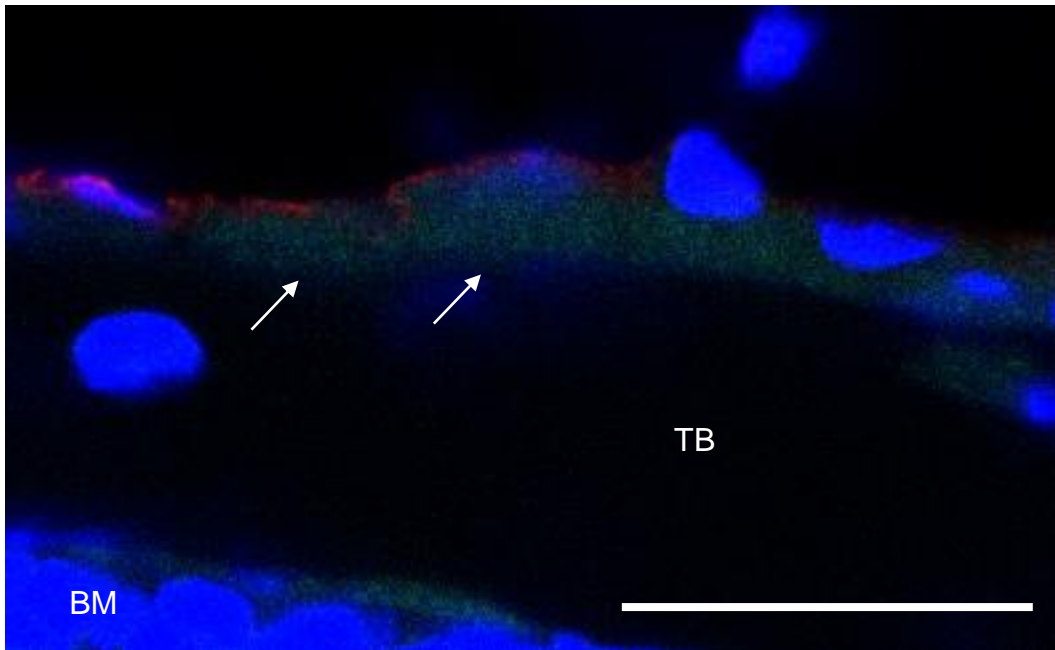

**b**

IF:CSNK2B/Sclerostin

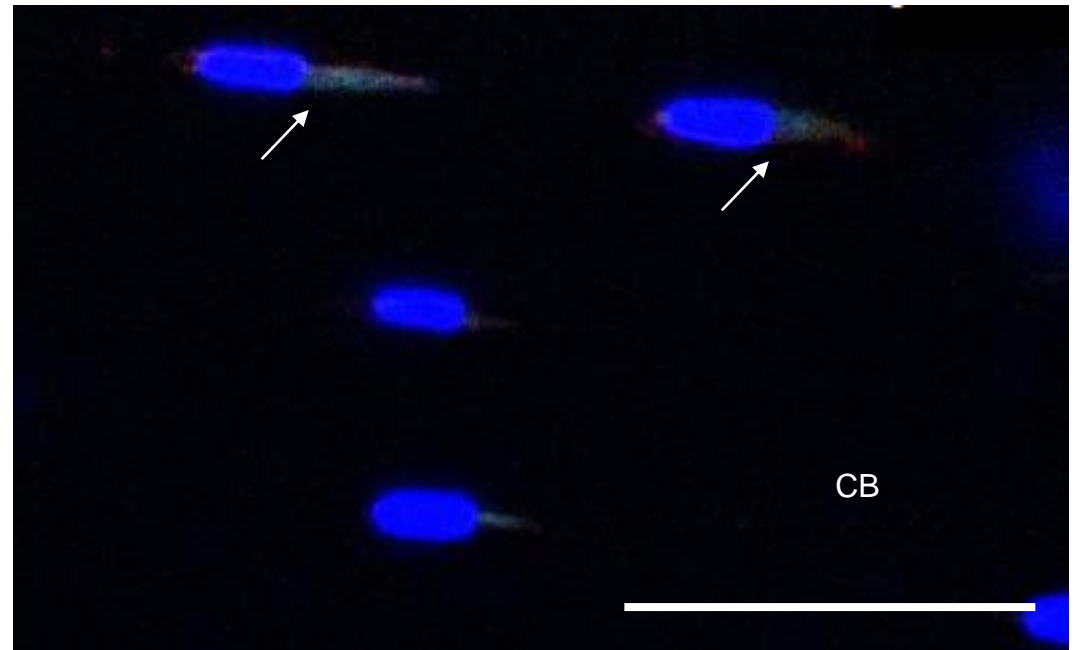

**a**

*Dmp1;Rosa26<sup>mT/mG</sup>*

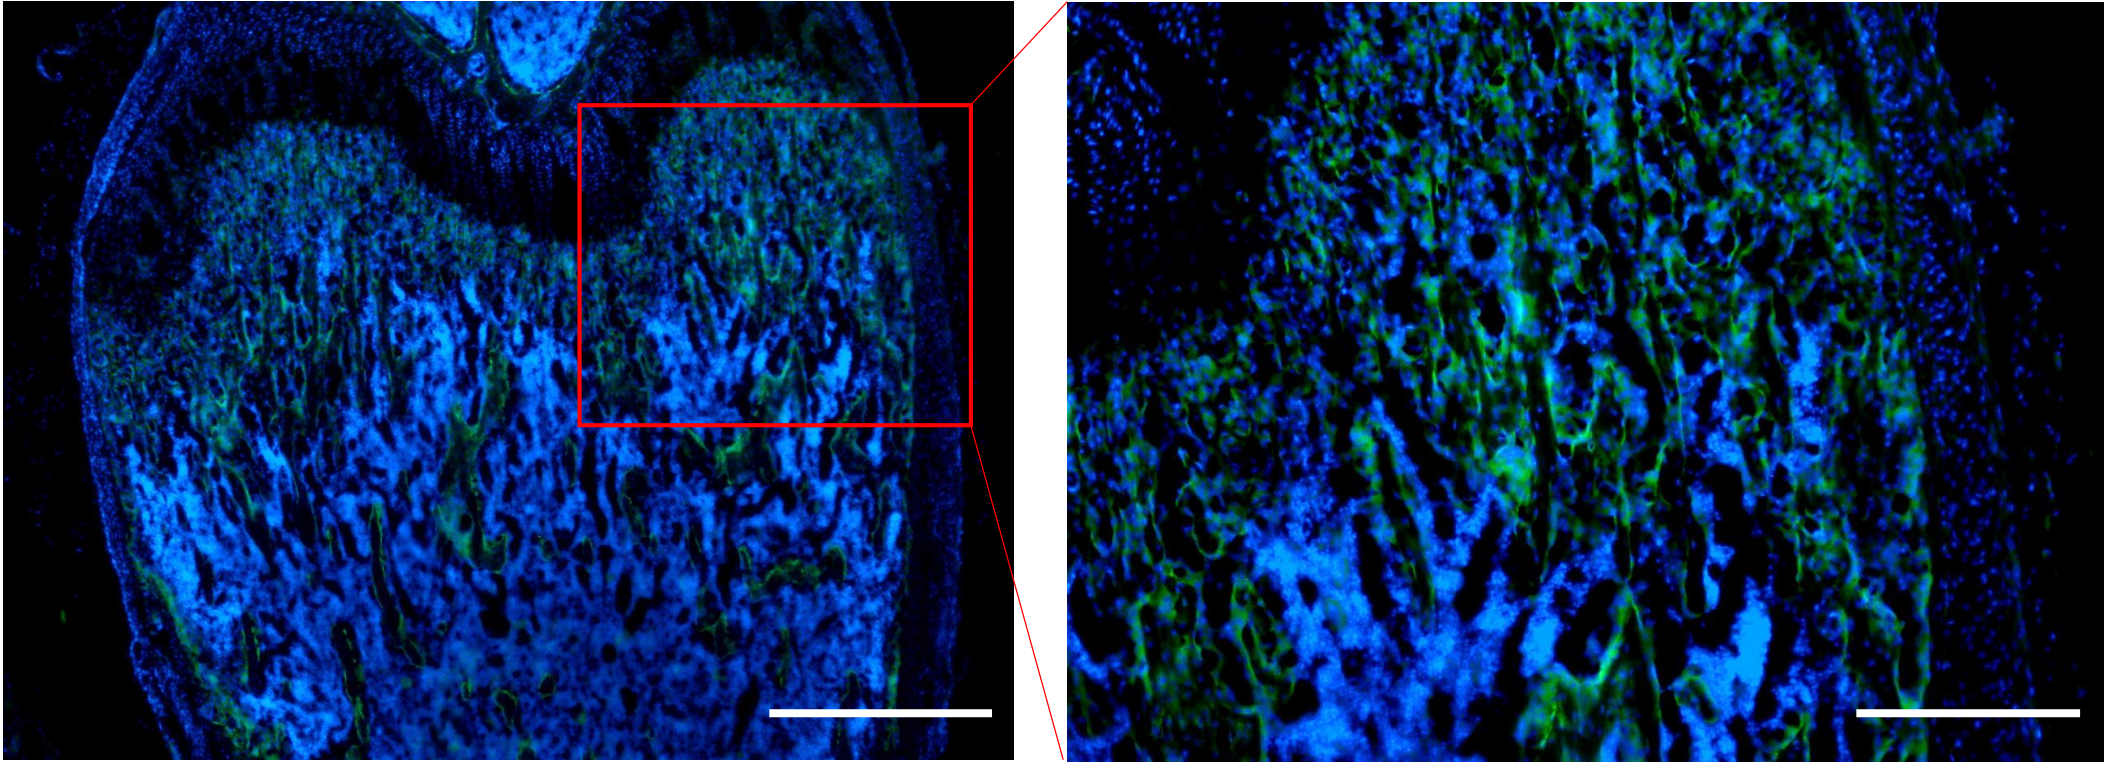

**b**

IF: CSNK2B

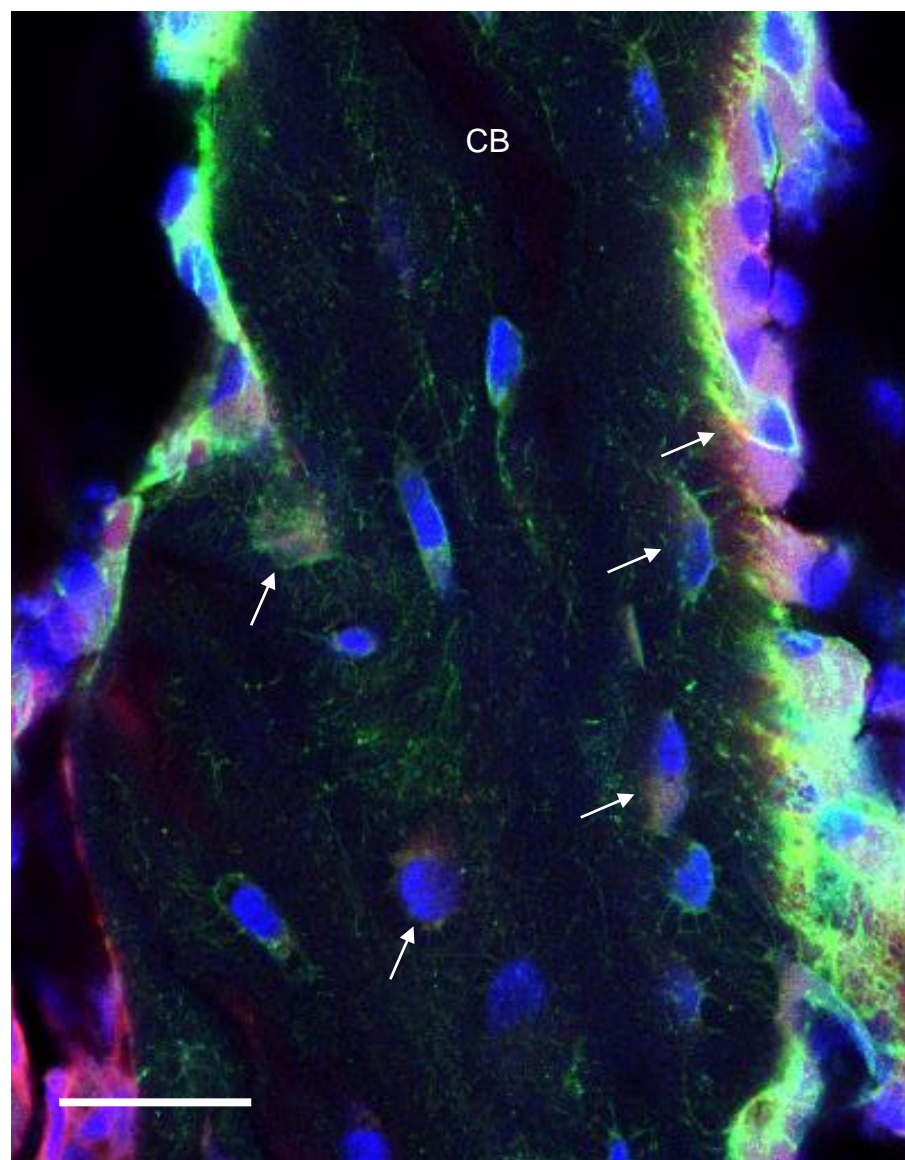



**a**

*Csnk2b<sup>fl/fl</sup>*

*Csnk2b<sup>Dmp1</sup>*

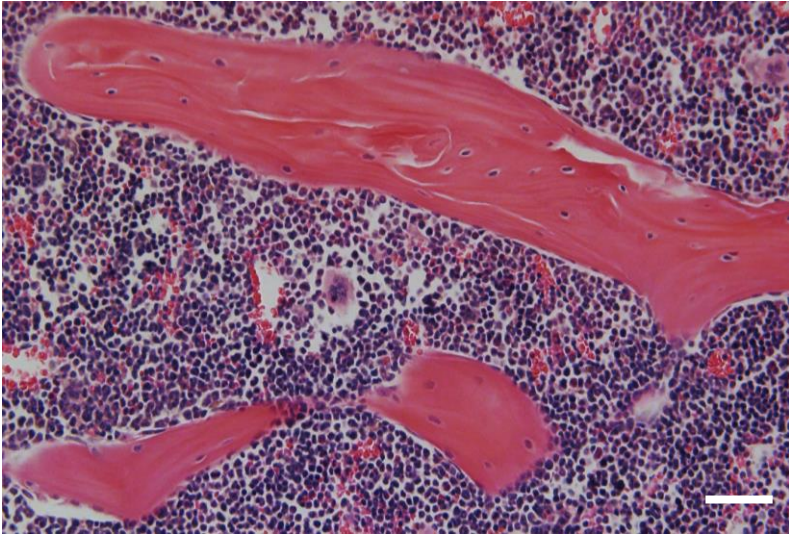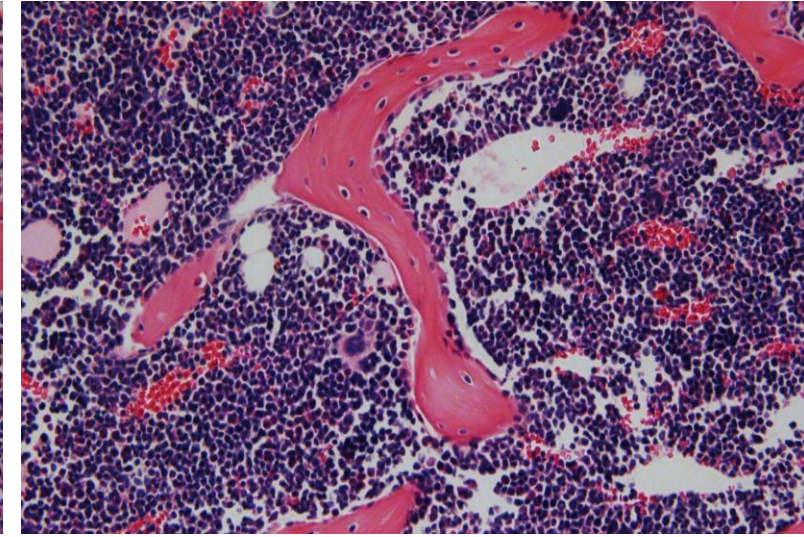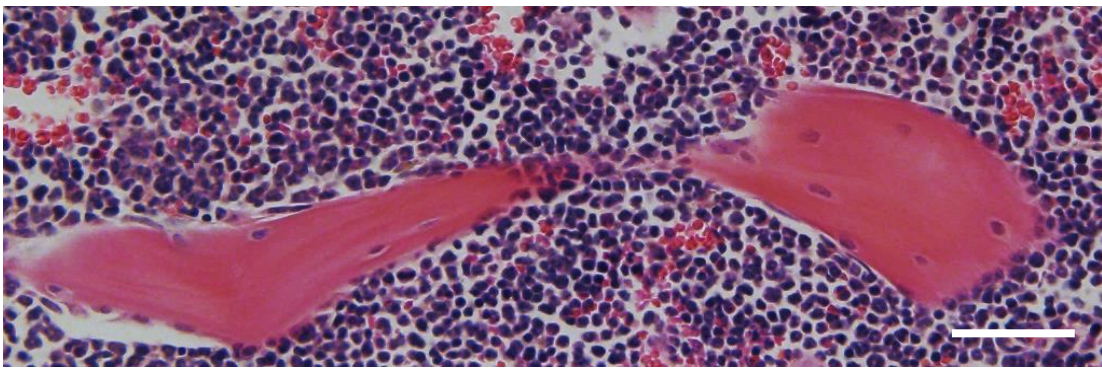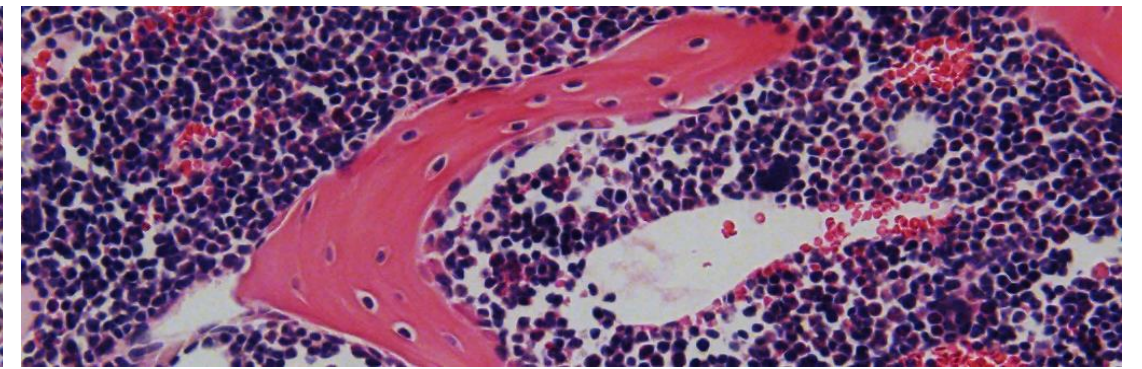

<H&E>

**b**

*Csnk2b<sup>fl/fl</sup>*

*Csnk2b<sup>Dmp1</sup>*

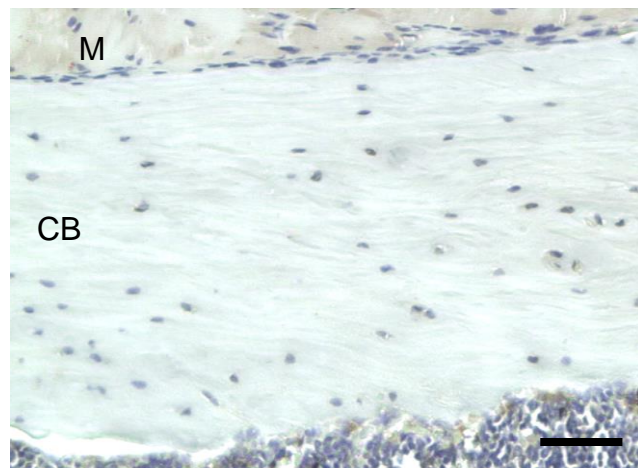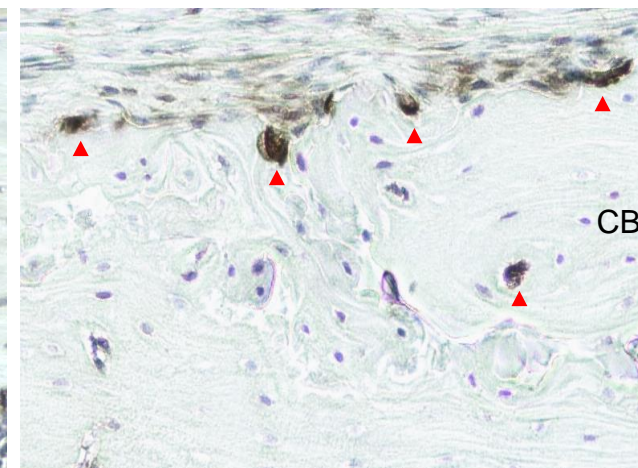

<IHC-Cathepsin K>

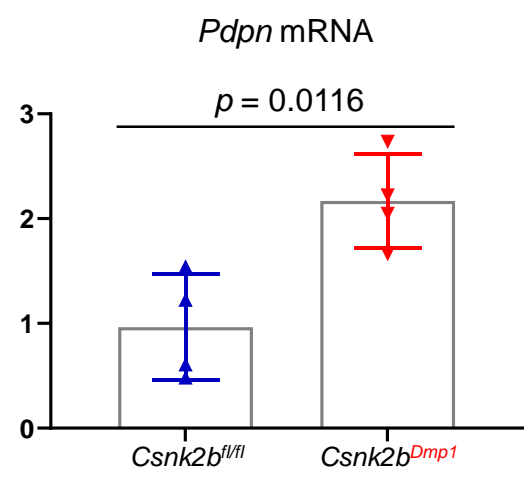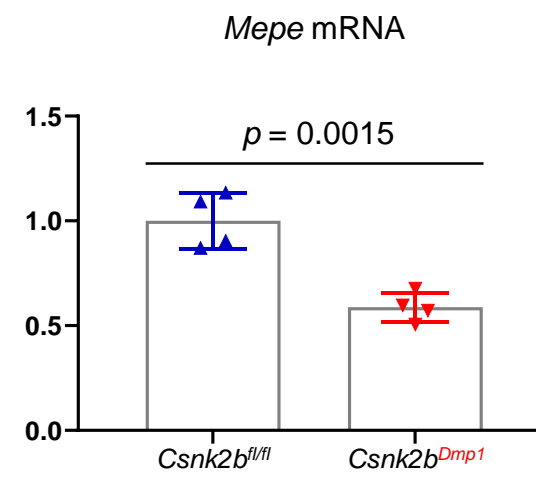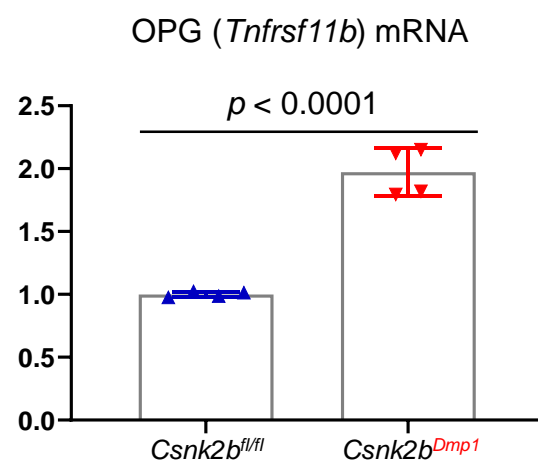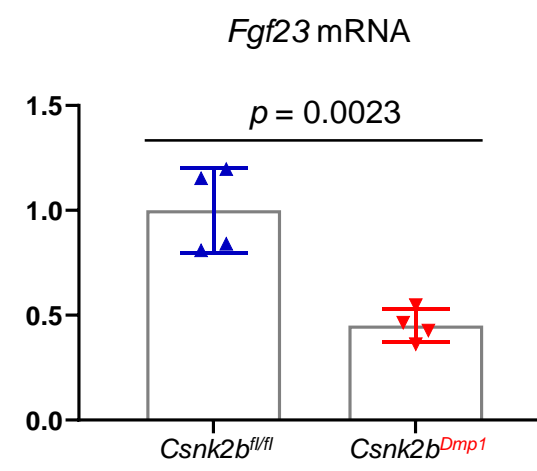



**a**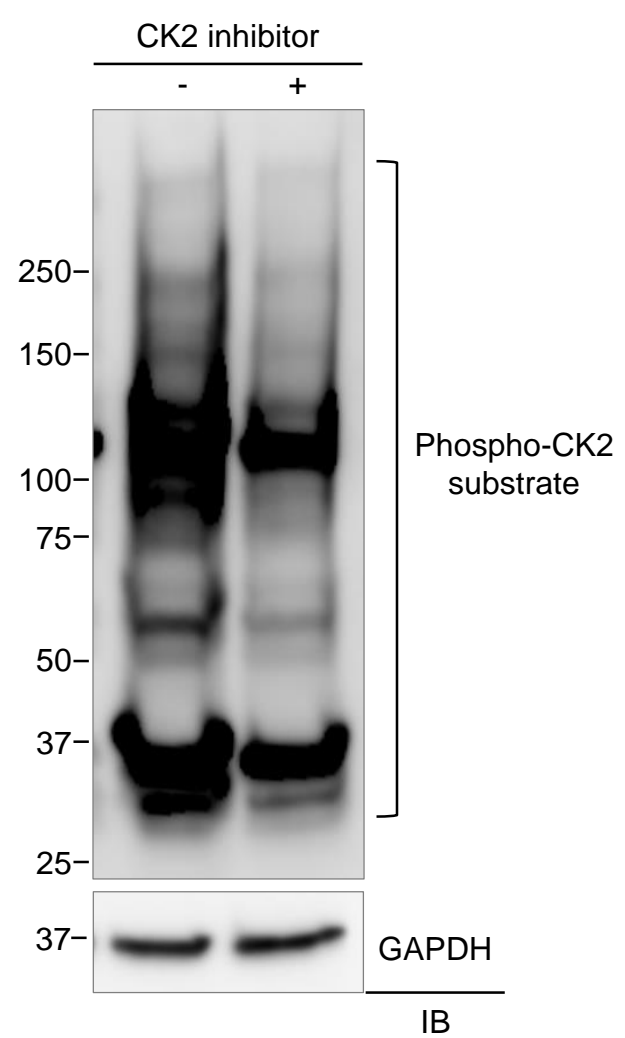**b**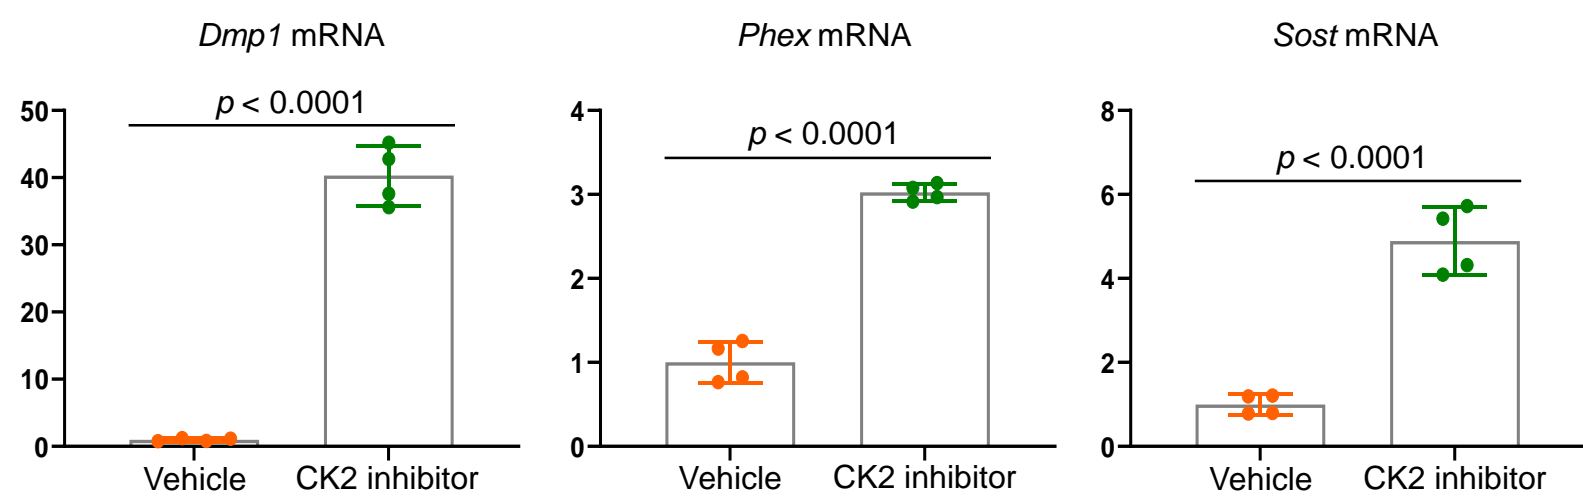

**a**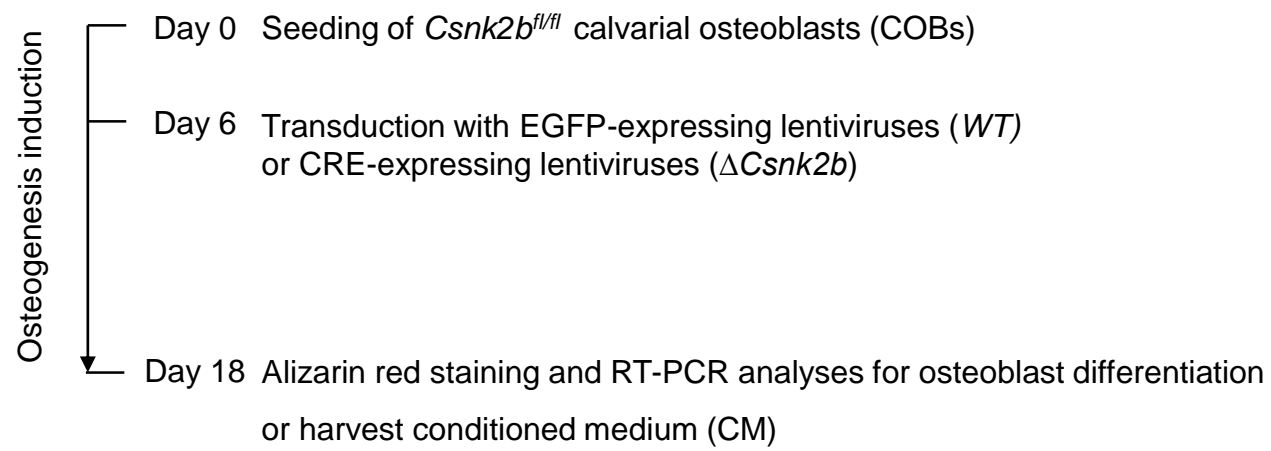**b**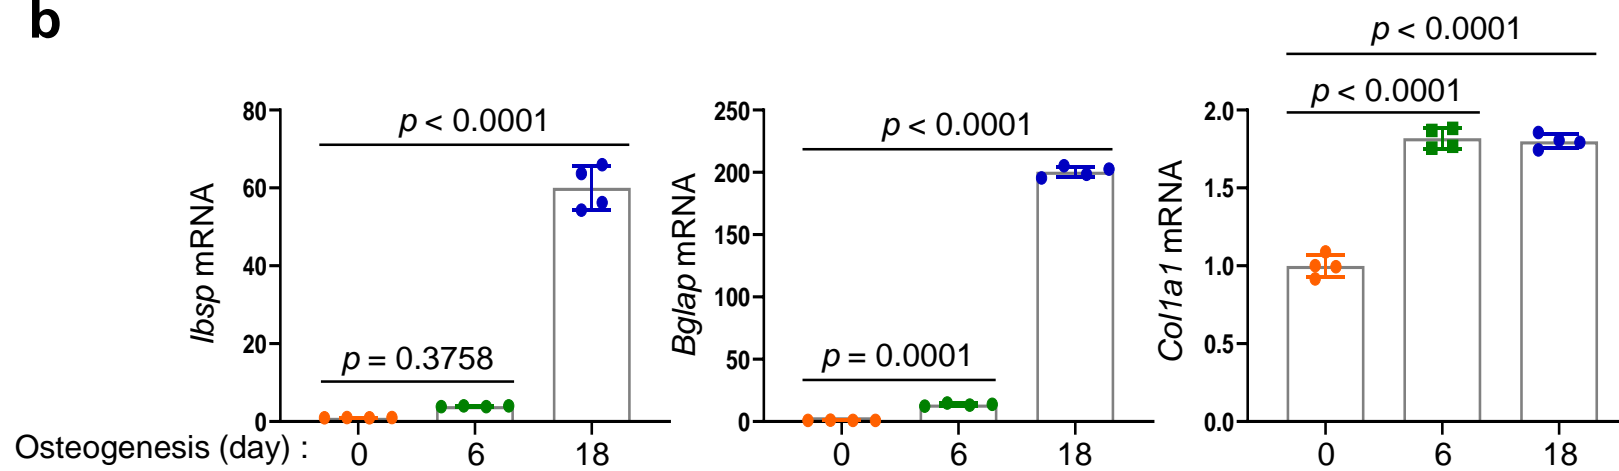**c**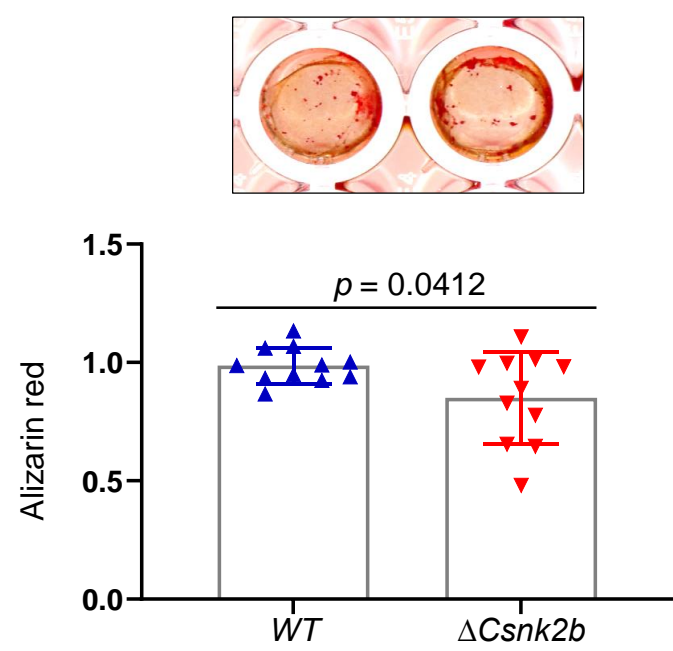**d**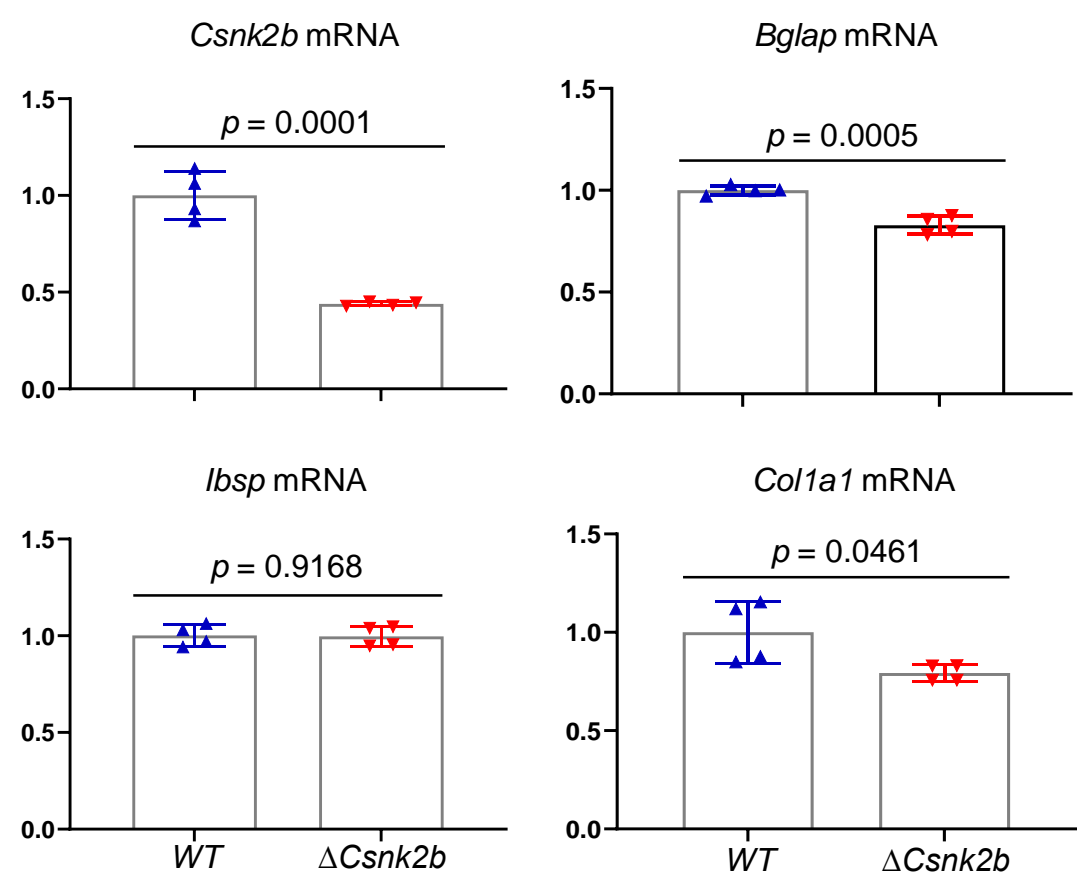



**a**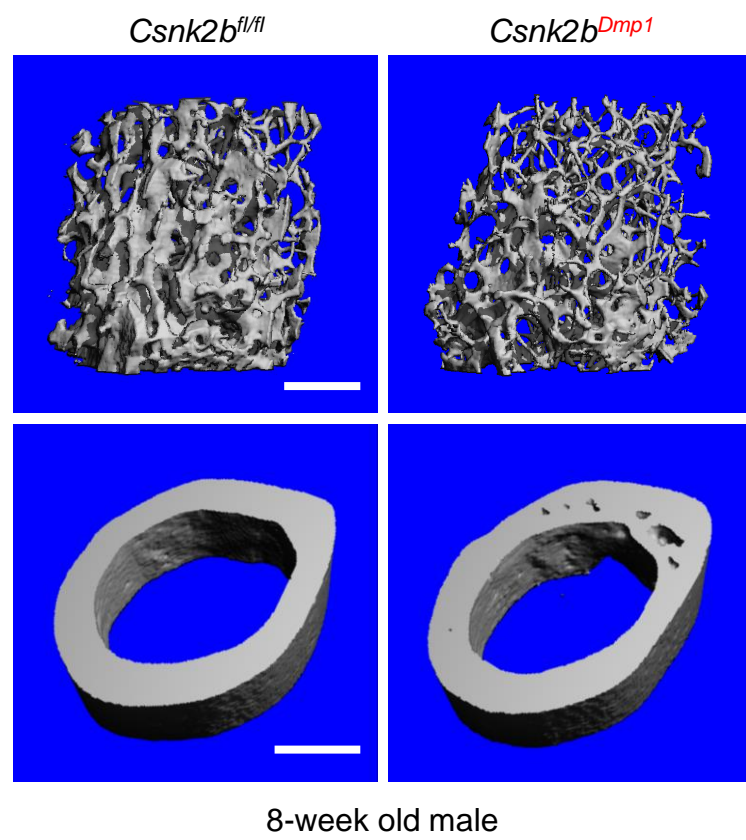**b**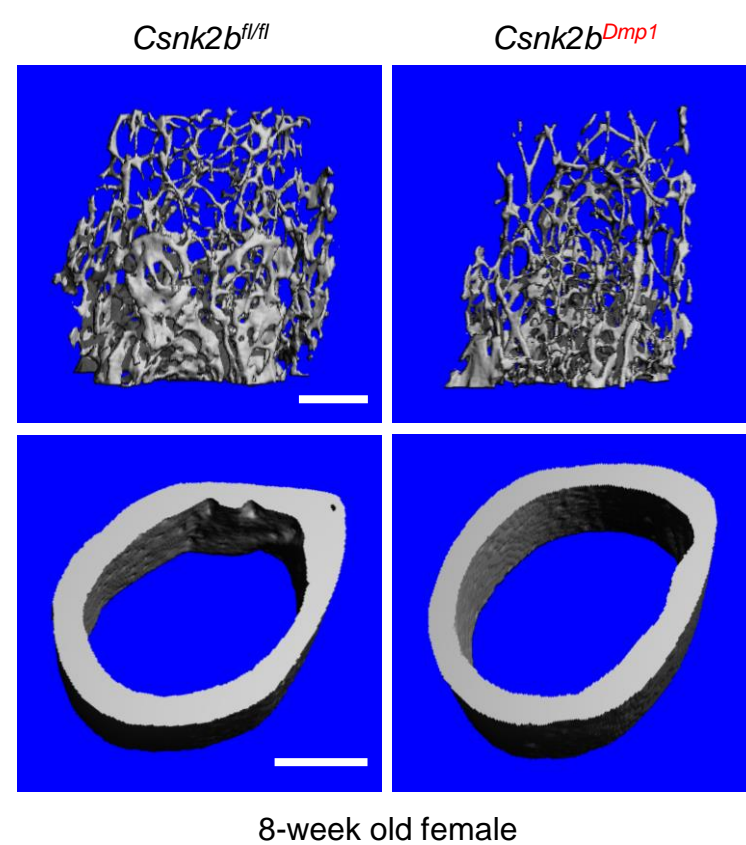**c**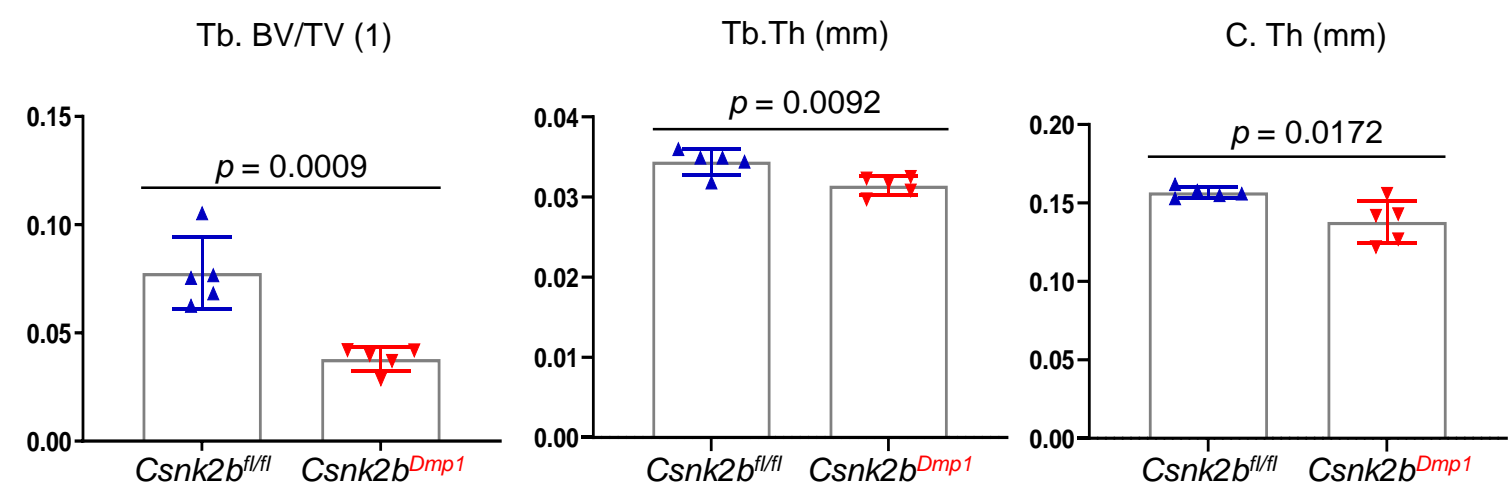

**a**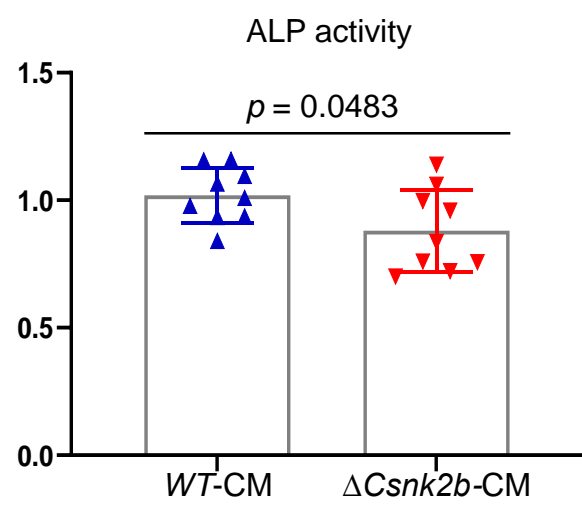**b**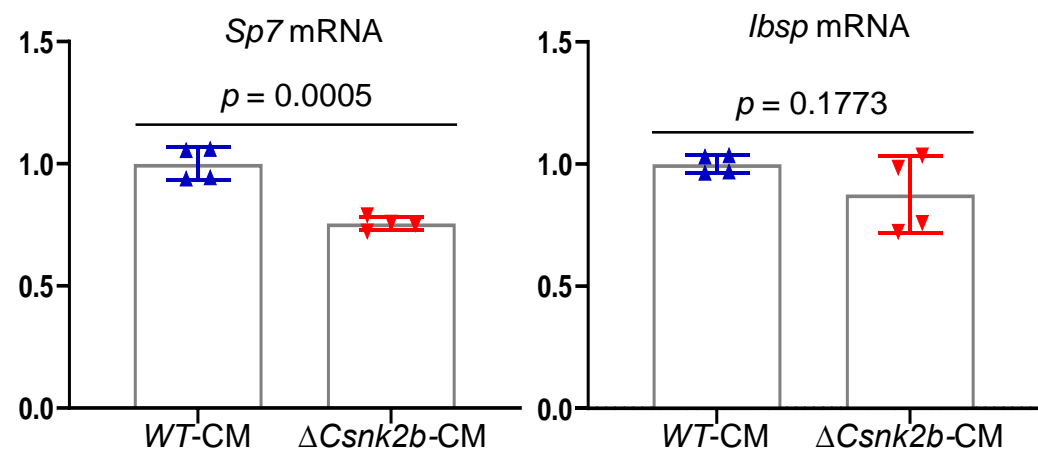**c**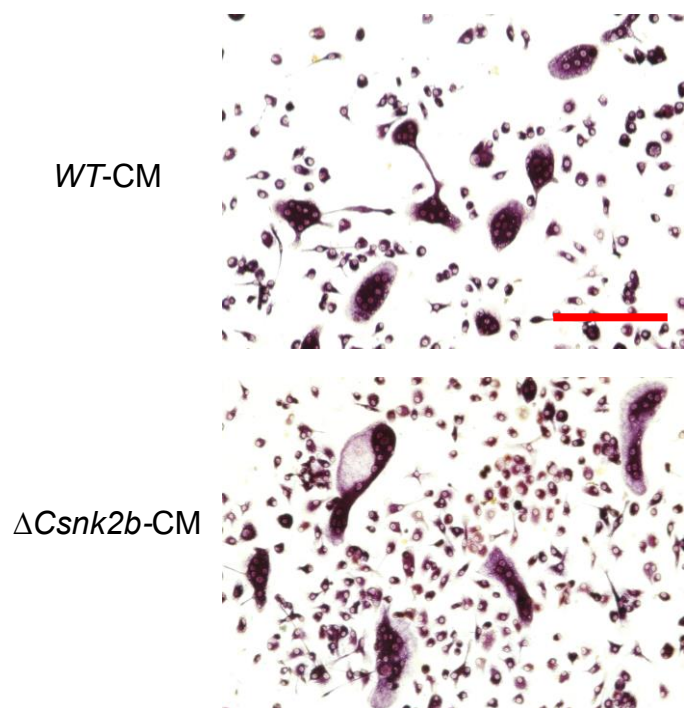**d**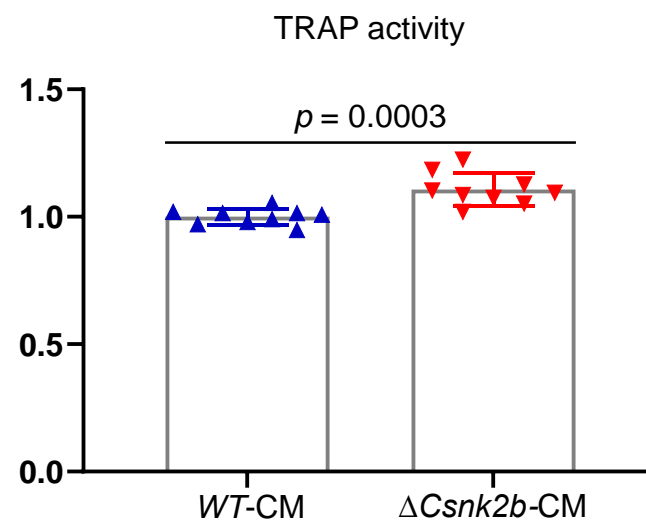**e**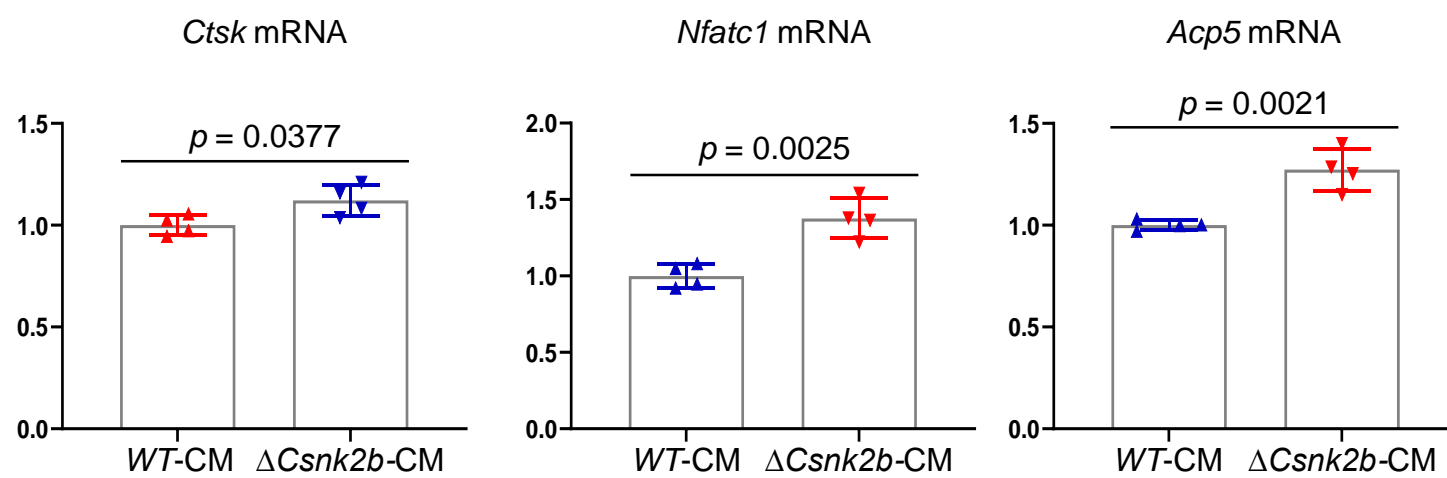

**a**

6 days of osteocyte differentiation

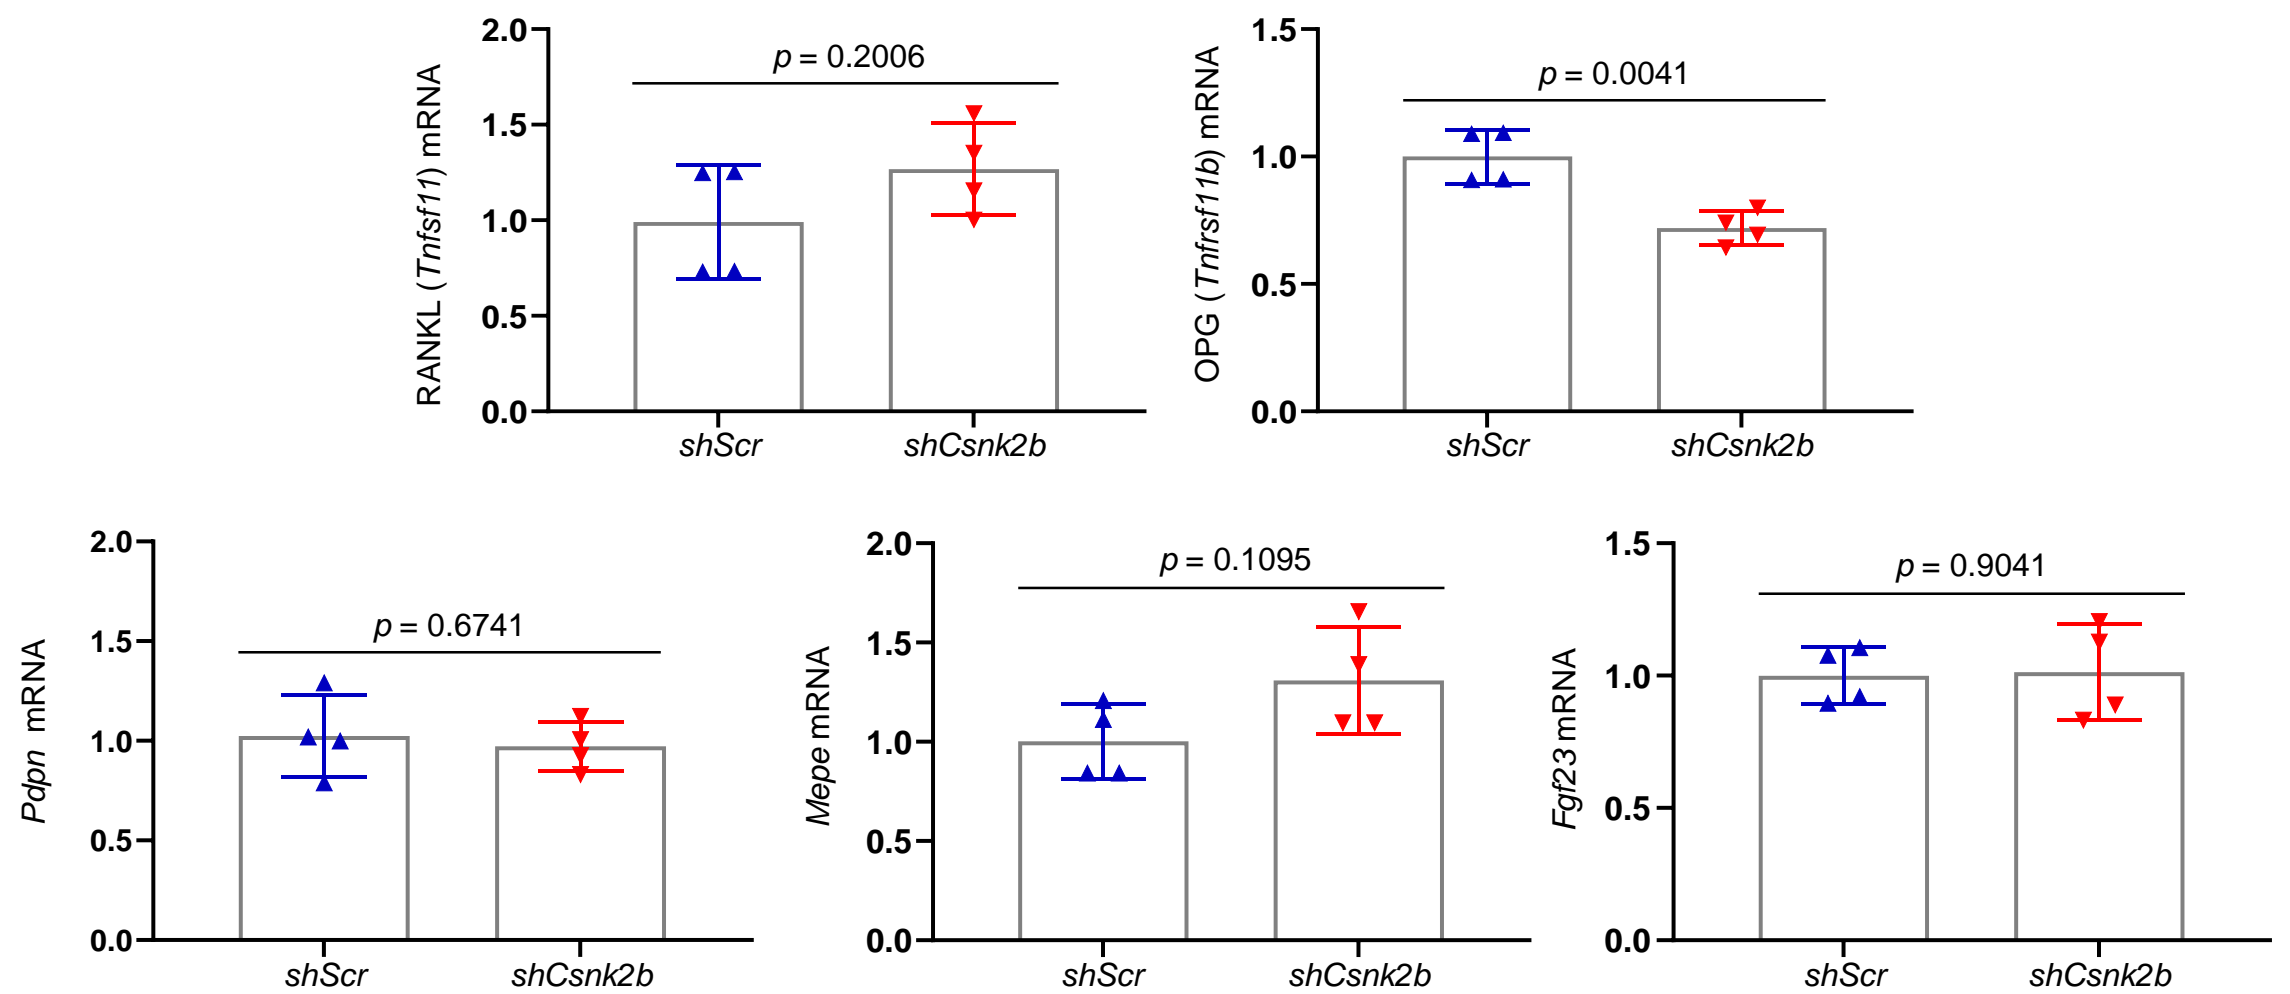**b**

18 days of osteocyte differentiation

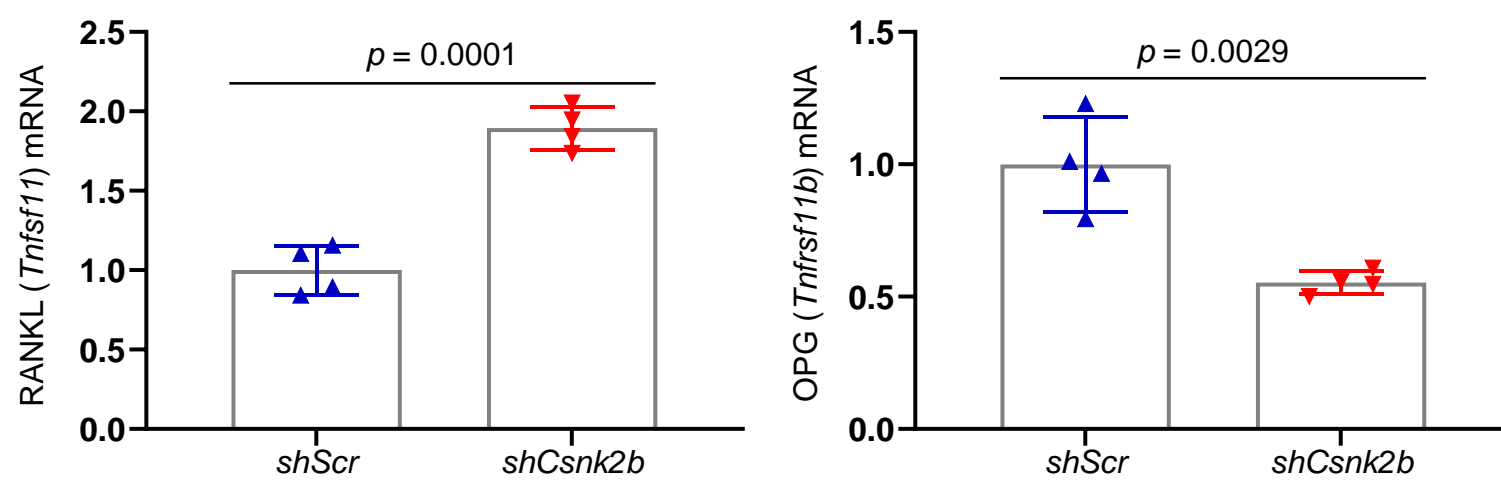

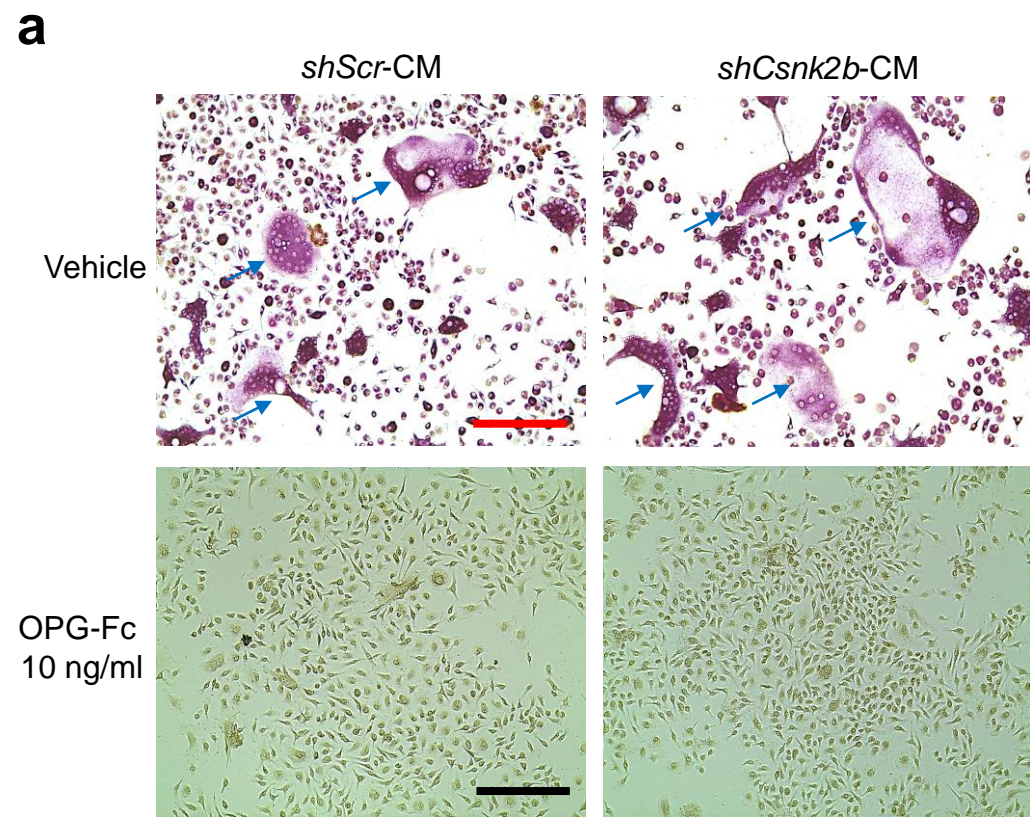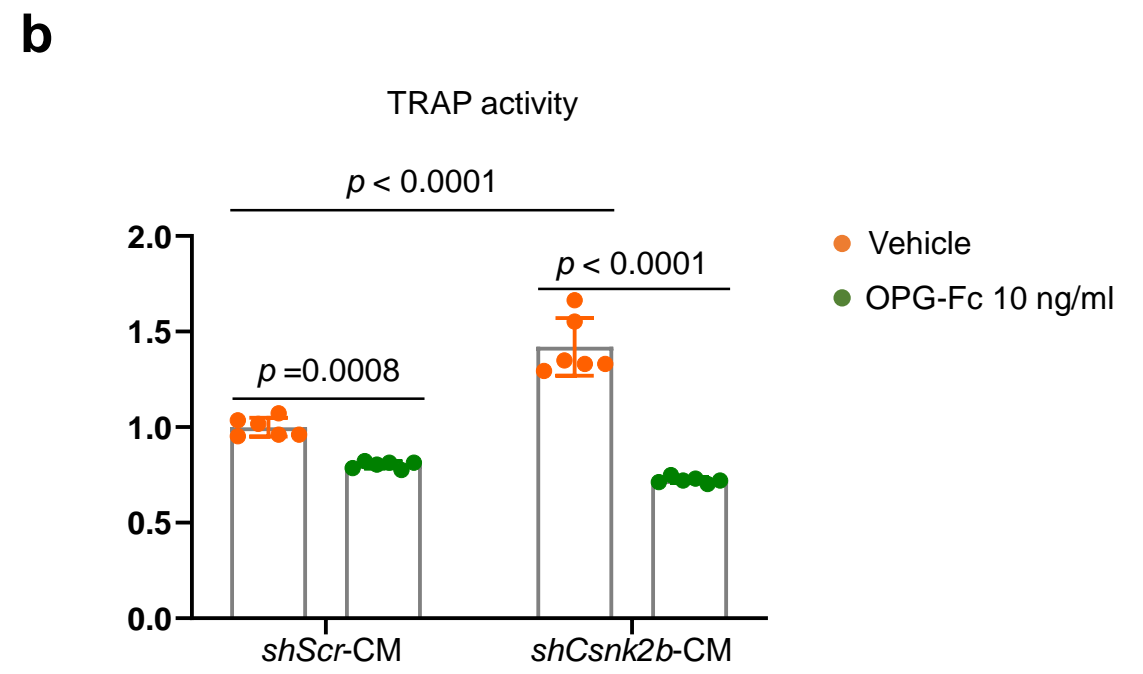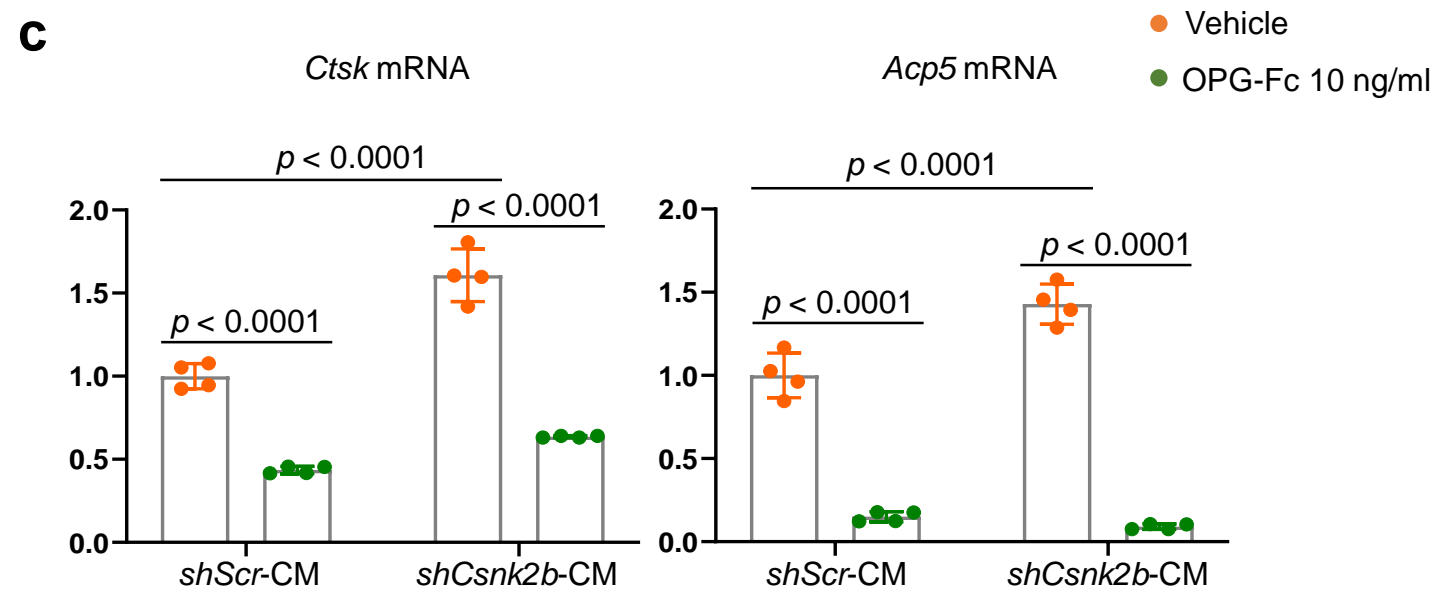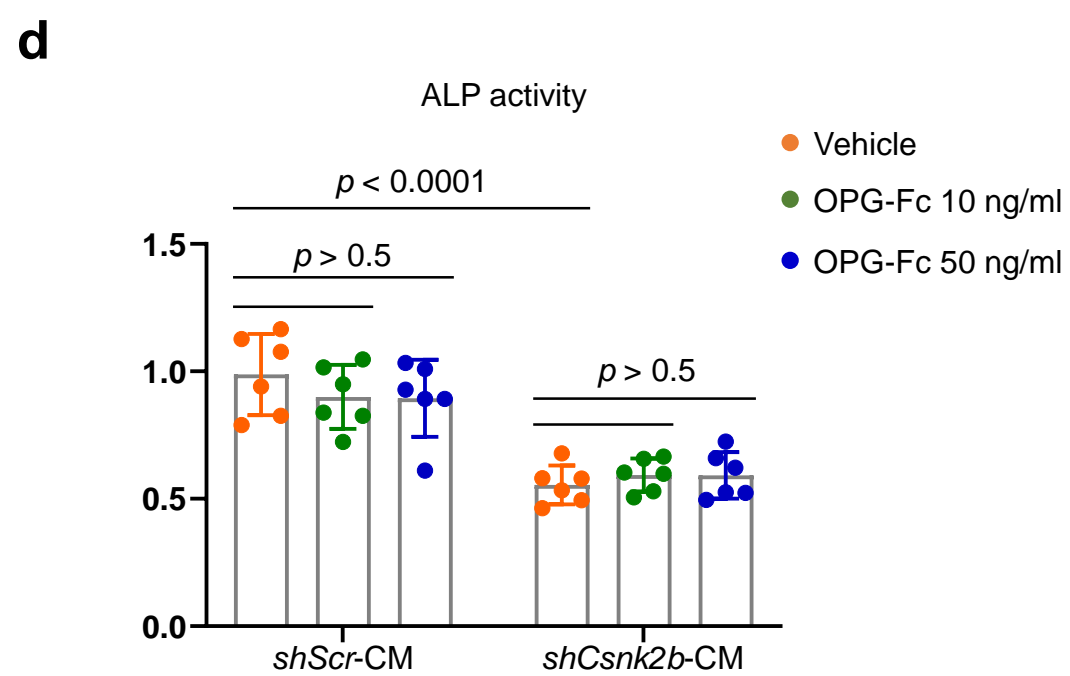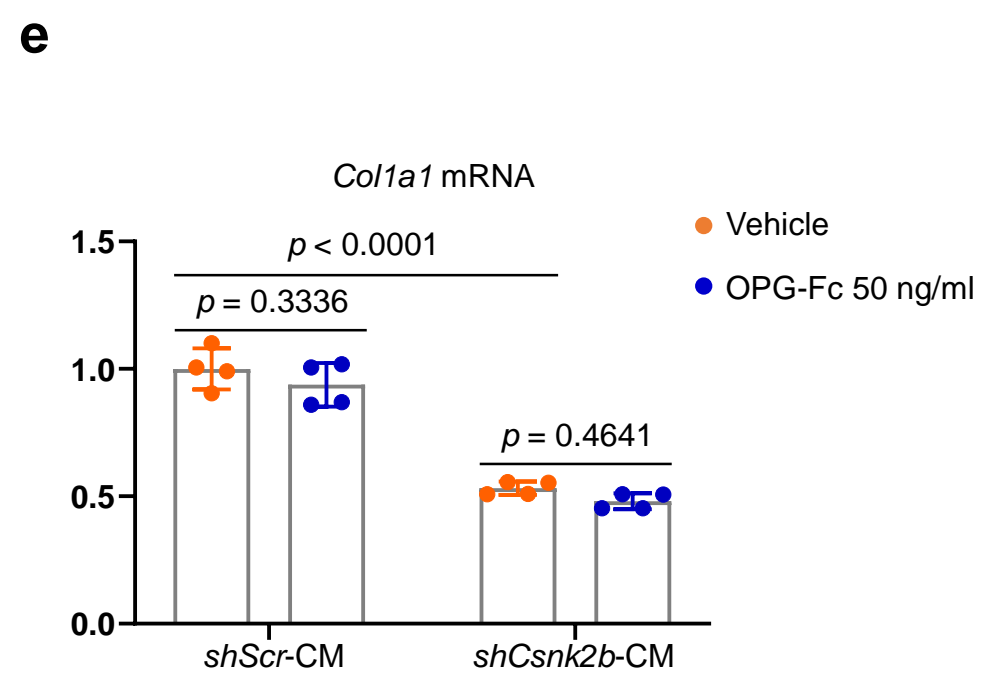

**a**

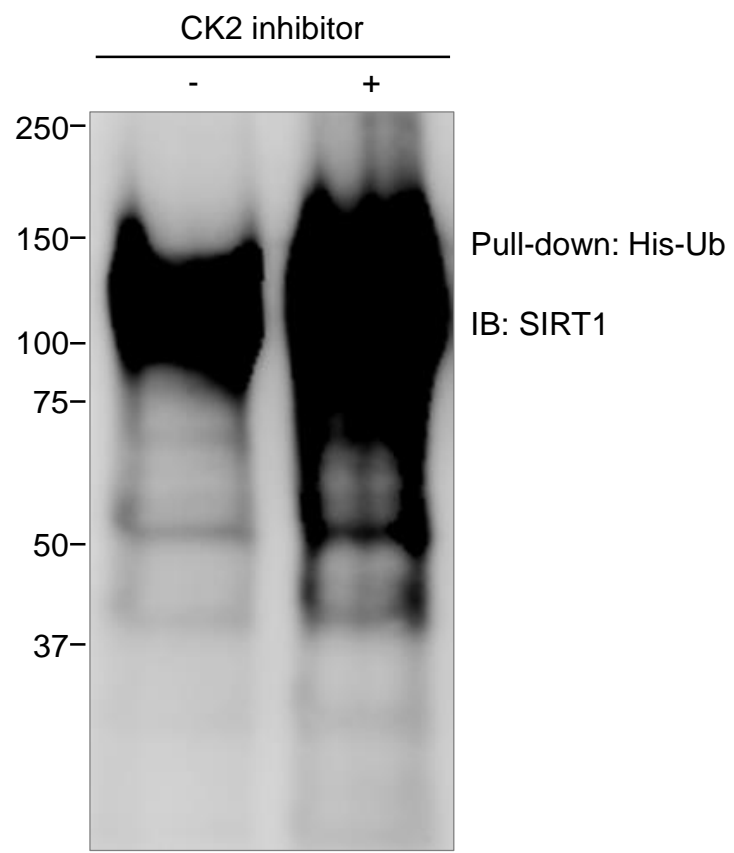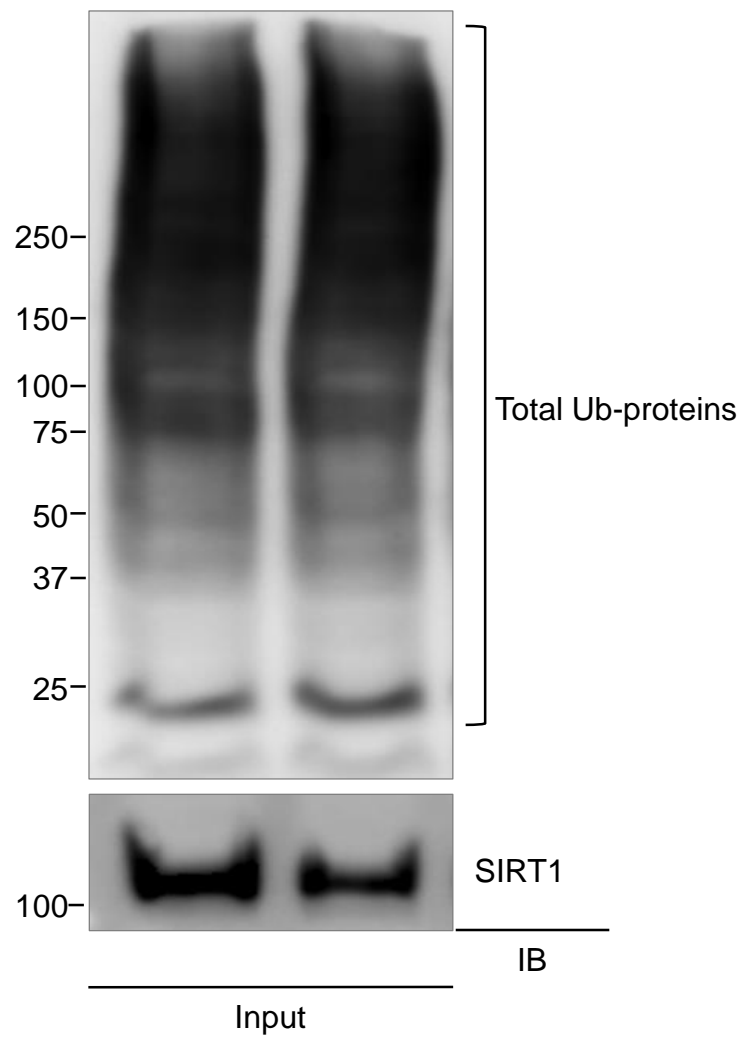

**b**

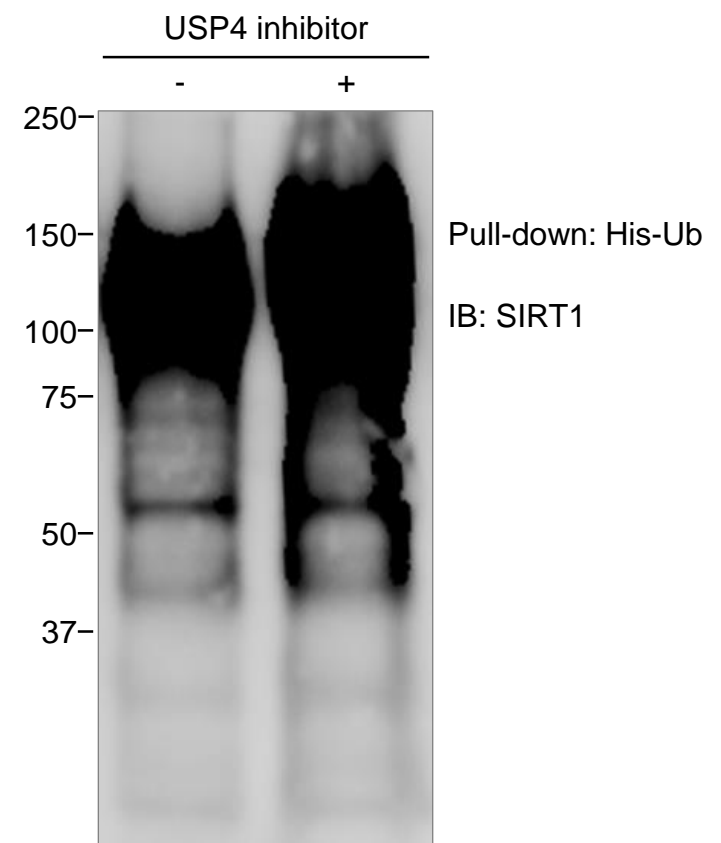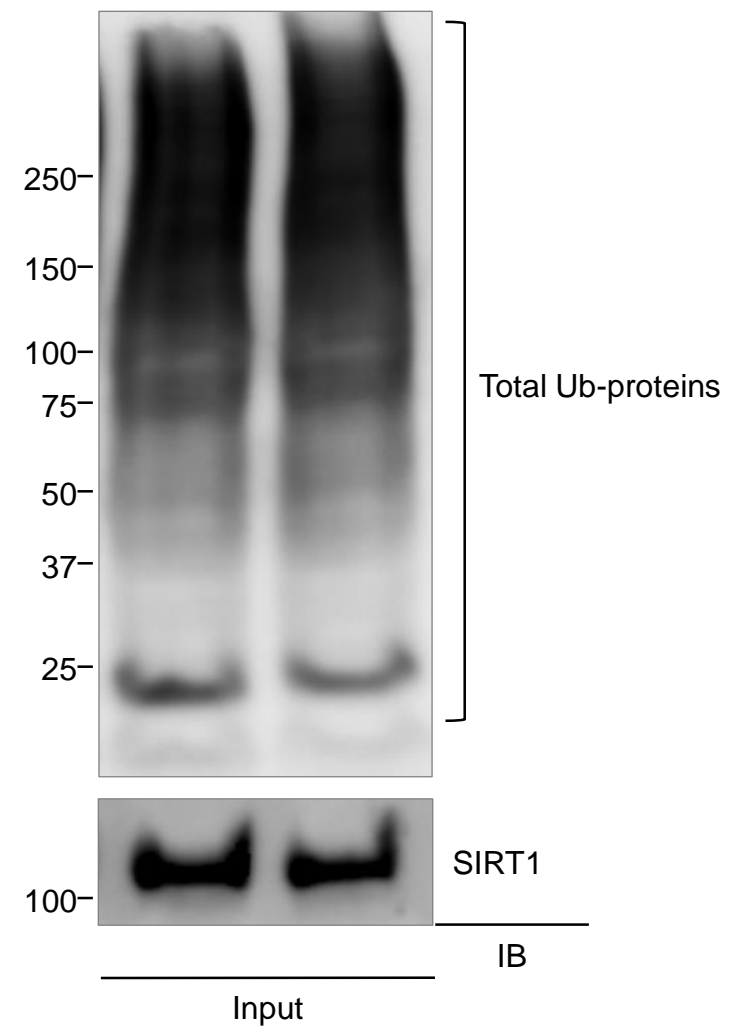



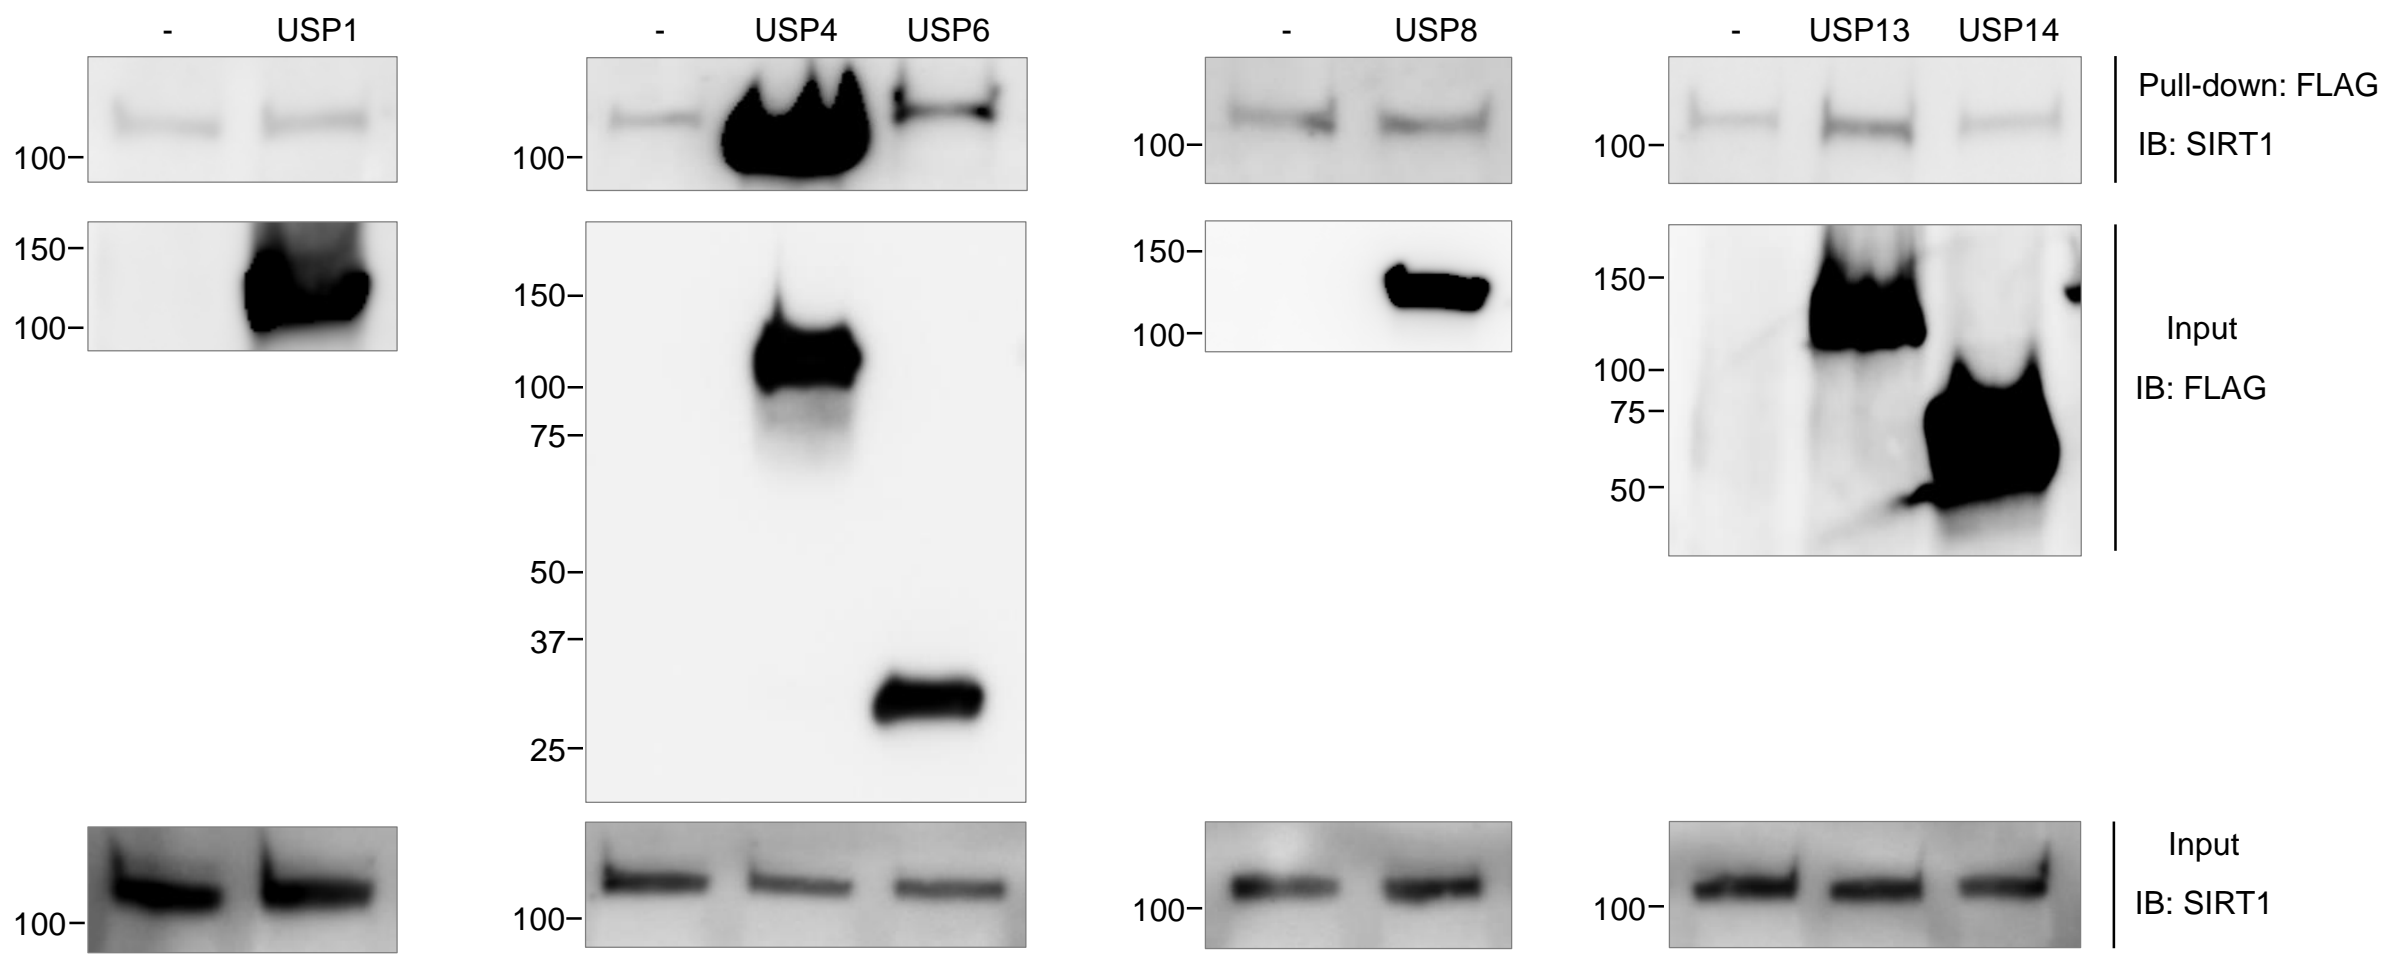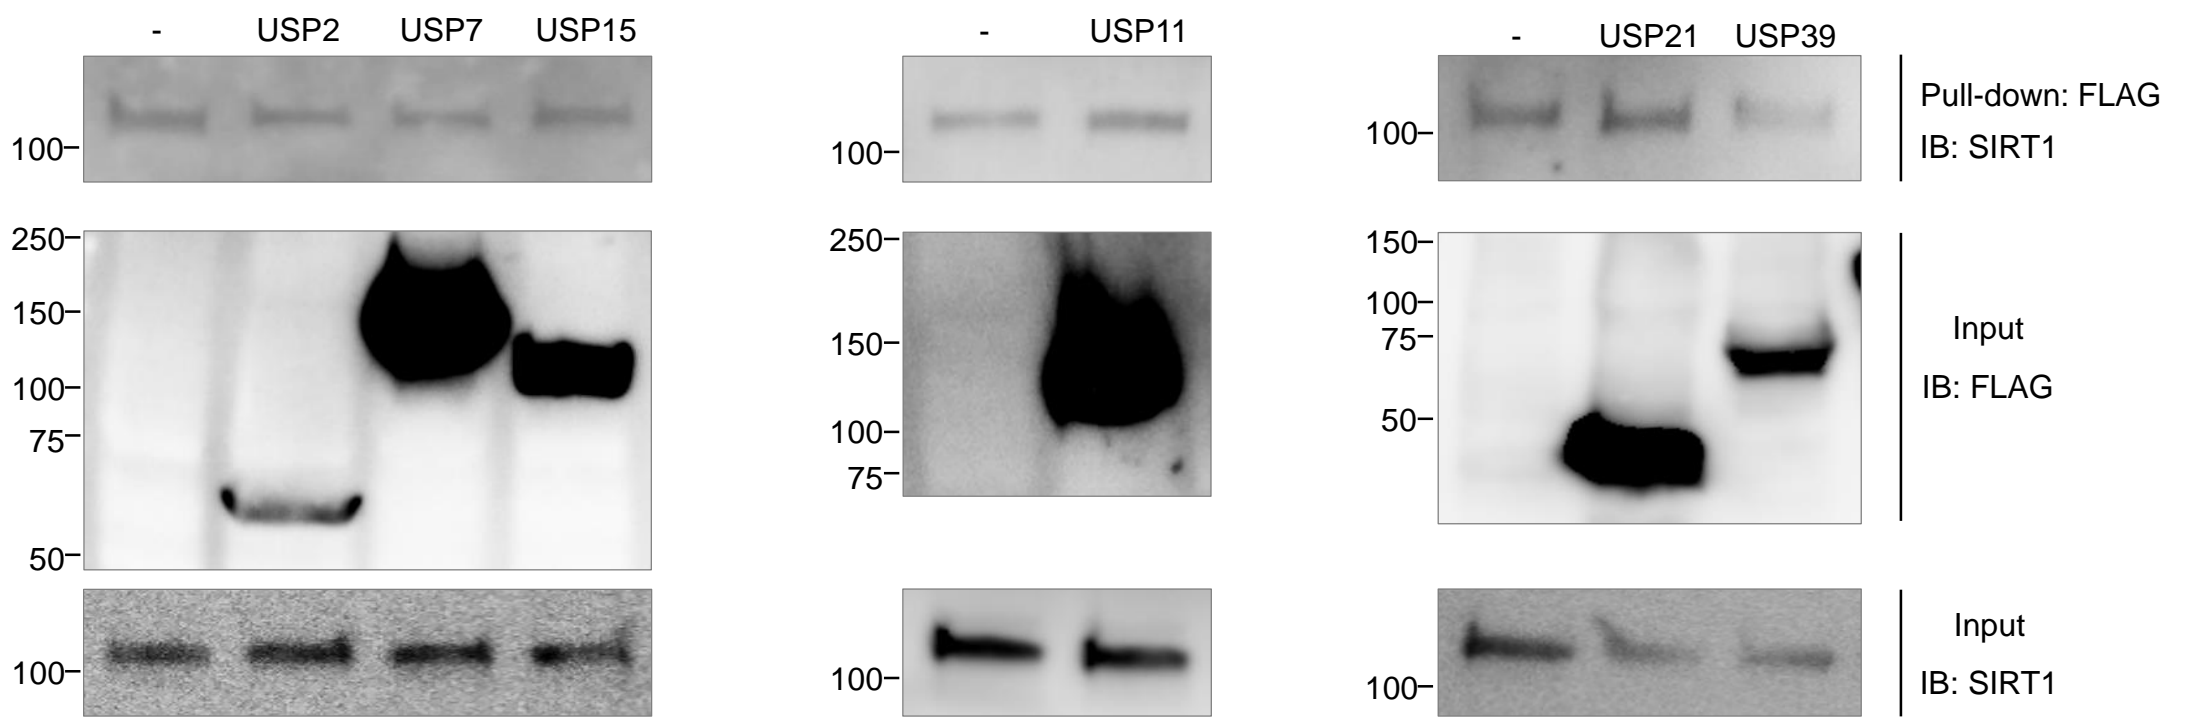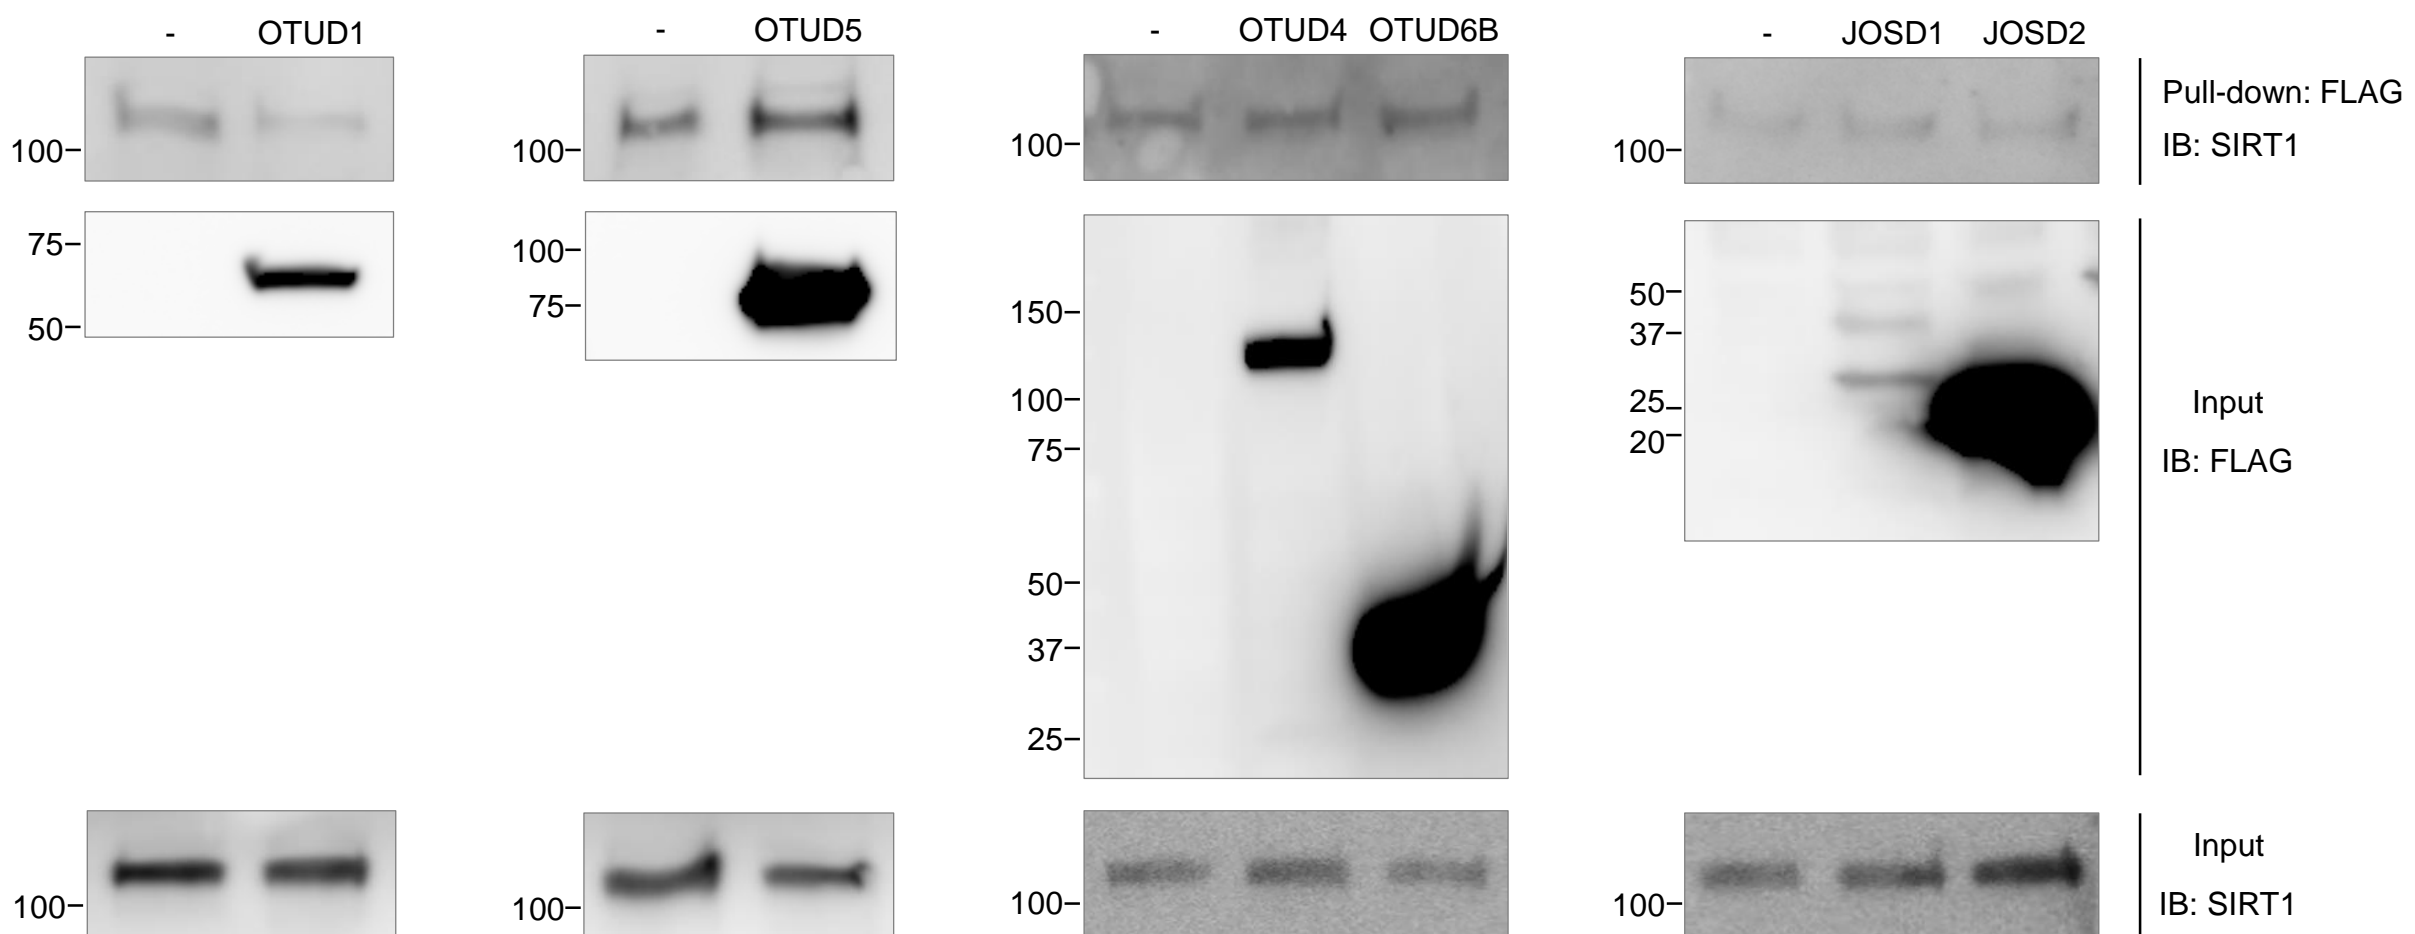

**Supplementary Fig. 12**

**a**

Fig. 6b, loading controls for Ni-NTA fractions

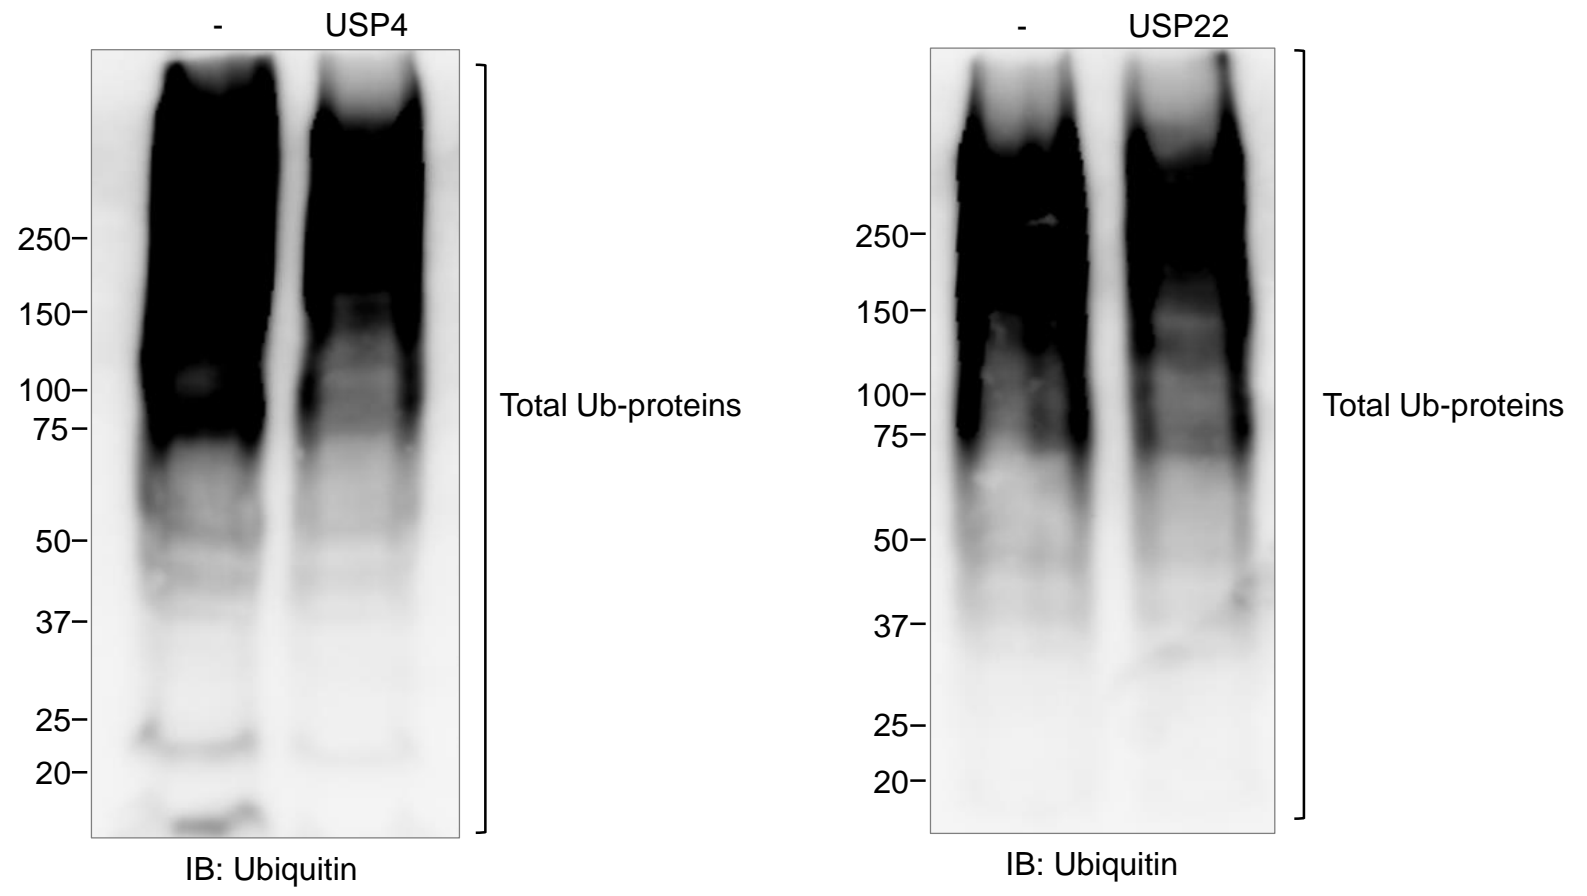

**b**

Fig. 6c, loading controls for Ni-NTA fractions

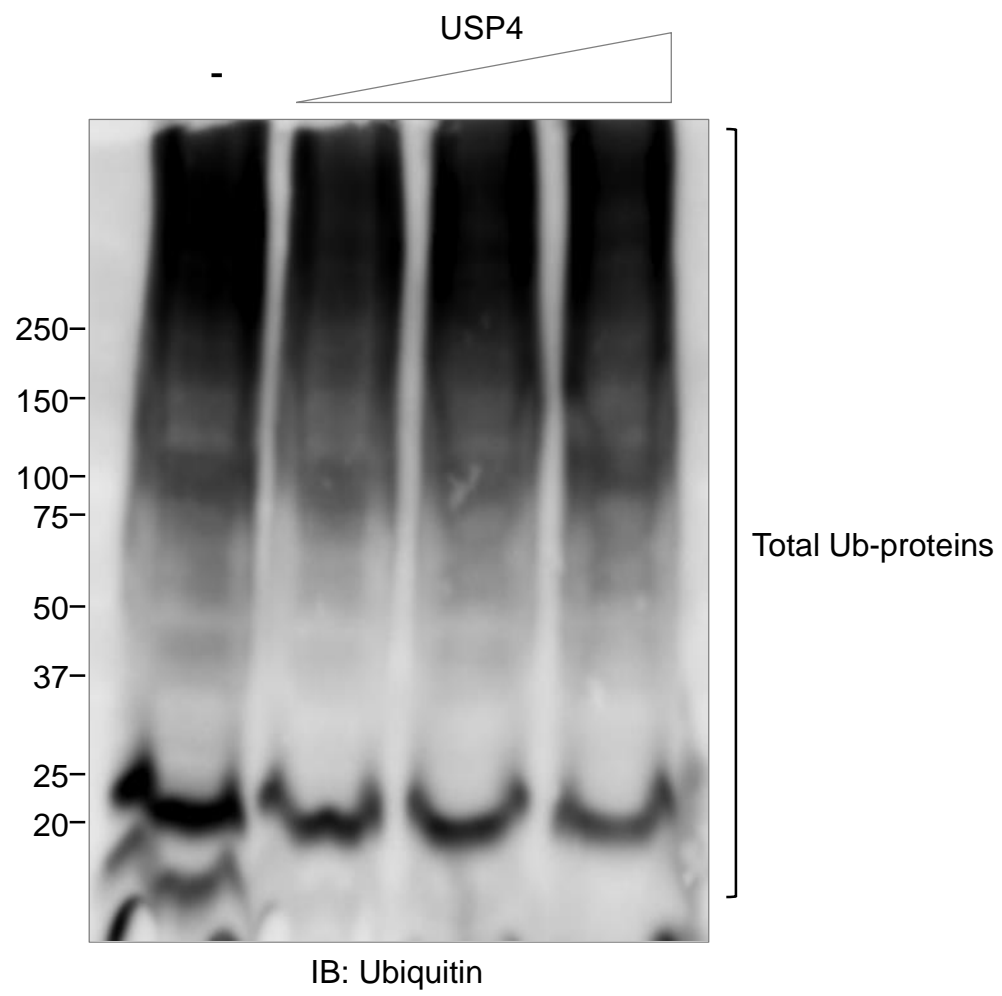

**c**

Fig. 6f, loading controls for Ni-NTA fractions

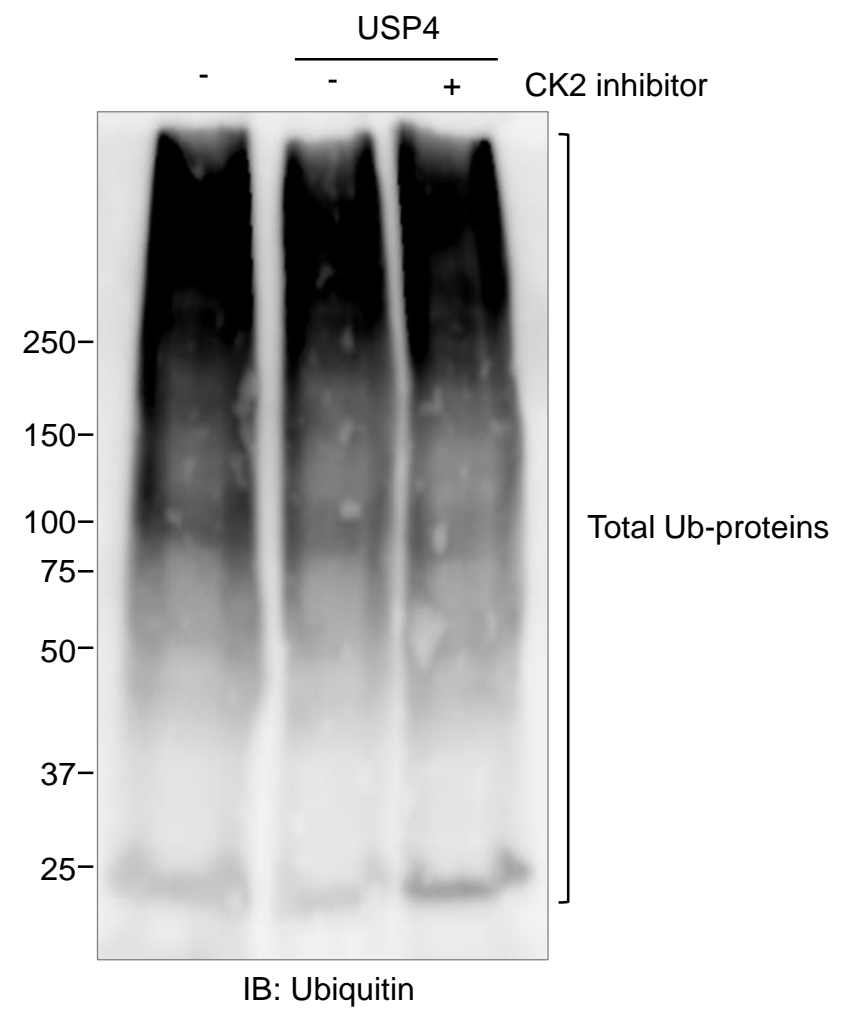

Supplement: 41418_2022_952_MOESM1_ESM.pdf [file 41418_2022_952_MOESM1_ESM.pdf]
