# Supplementary material
Source: PubMed Central journal article supplement (PMC9345882)

Fig. 3g (top)

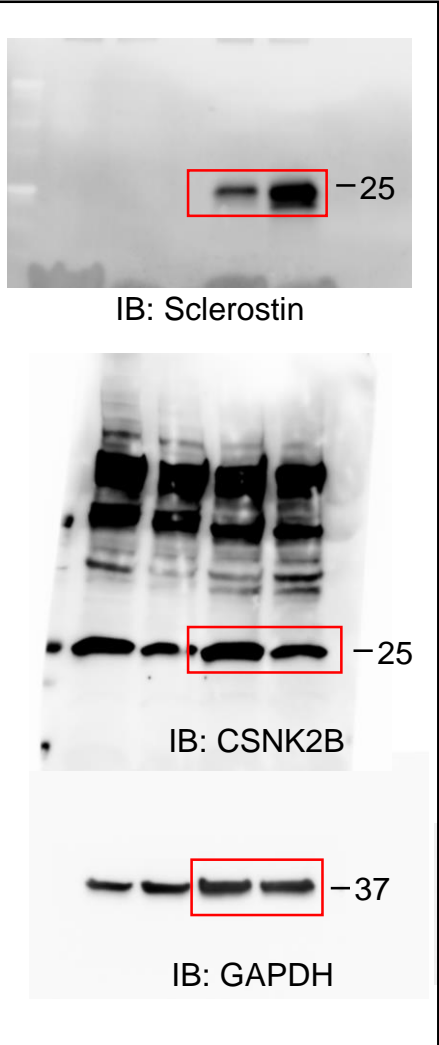

Fig. 3g (bottom)

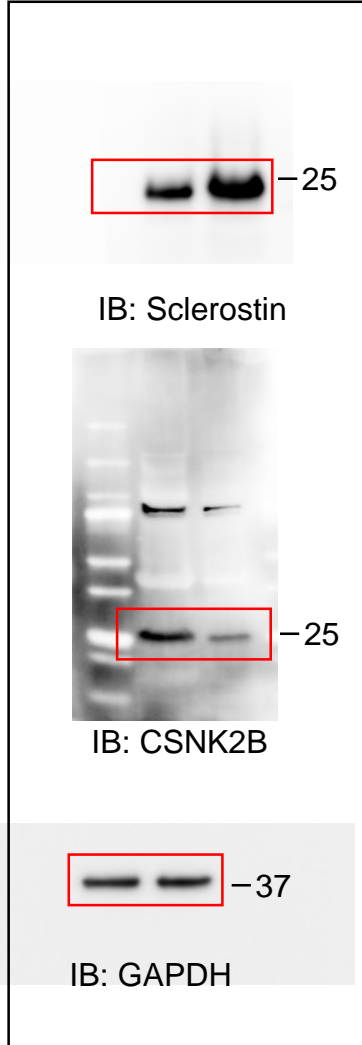

Fig. 5a

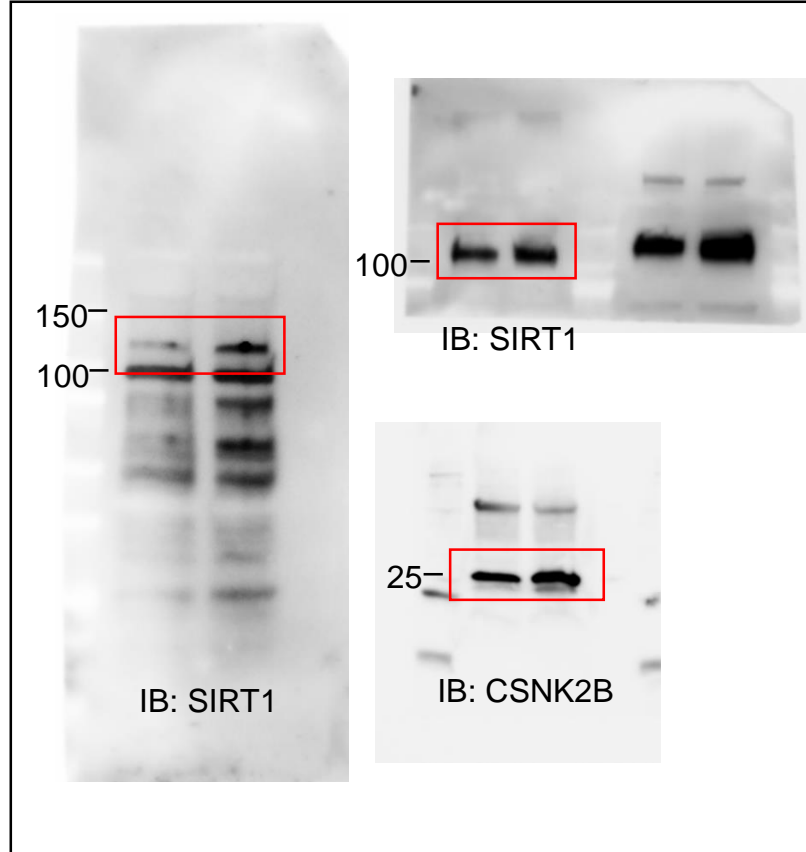

Fig. 5b

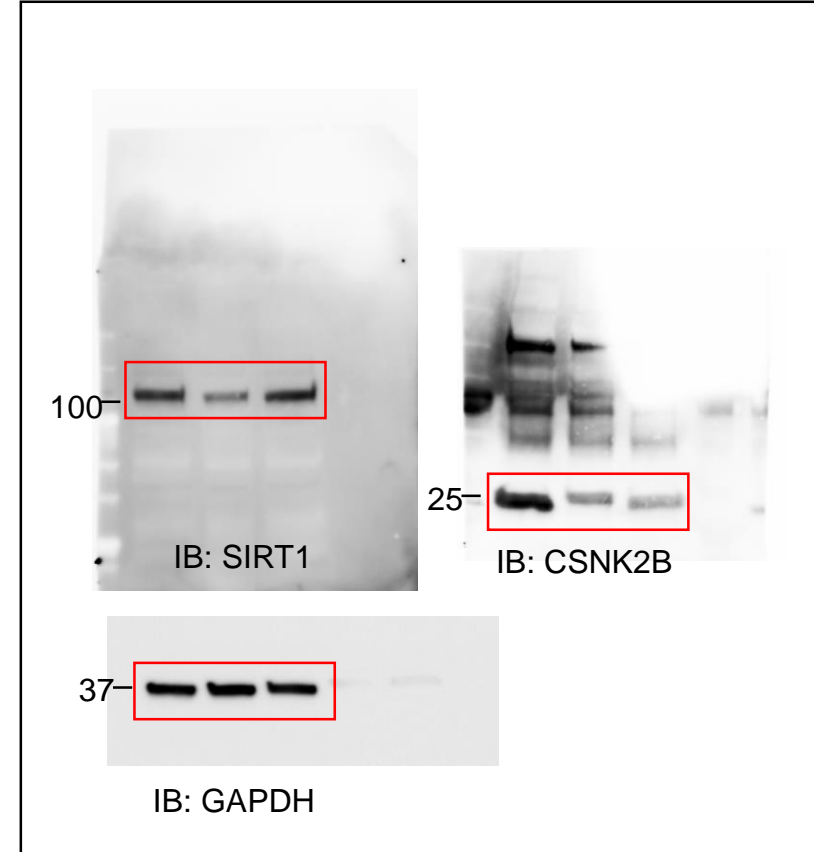

Fig. 5d

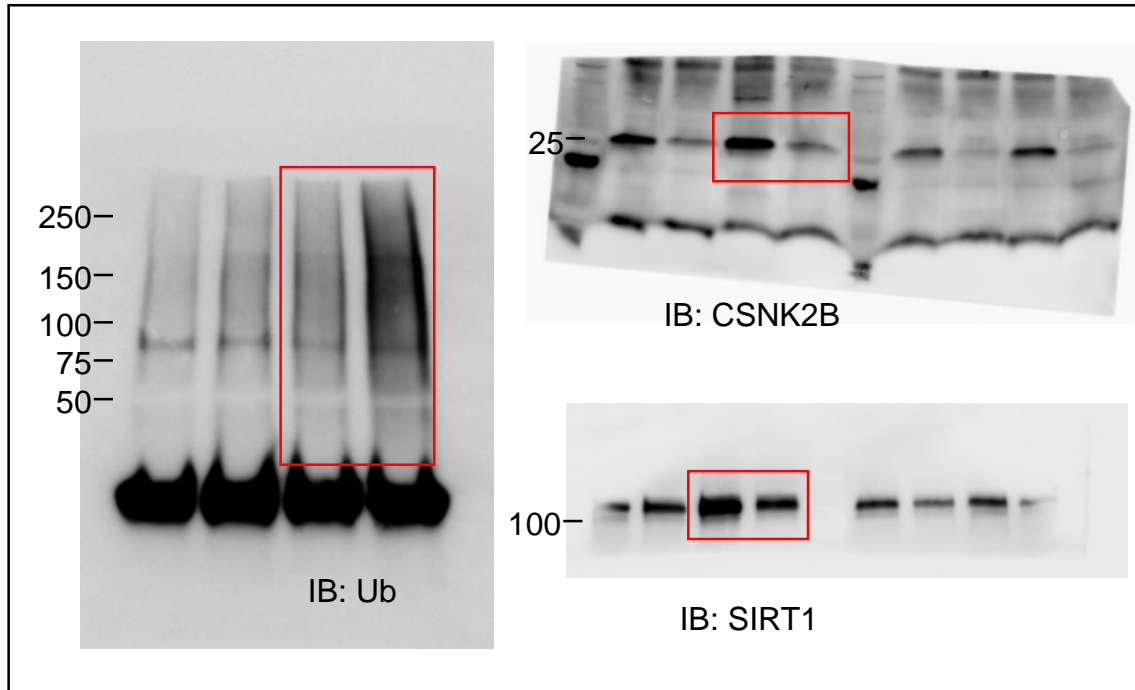

Fig. 6a (top)

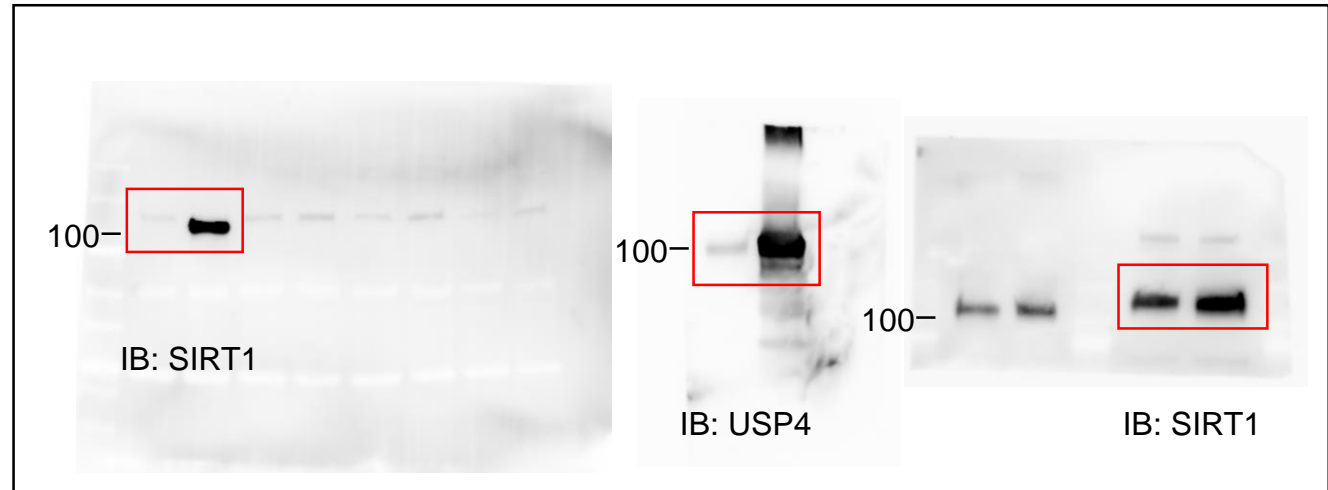

Fig. 6a (bottom)

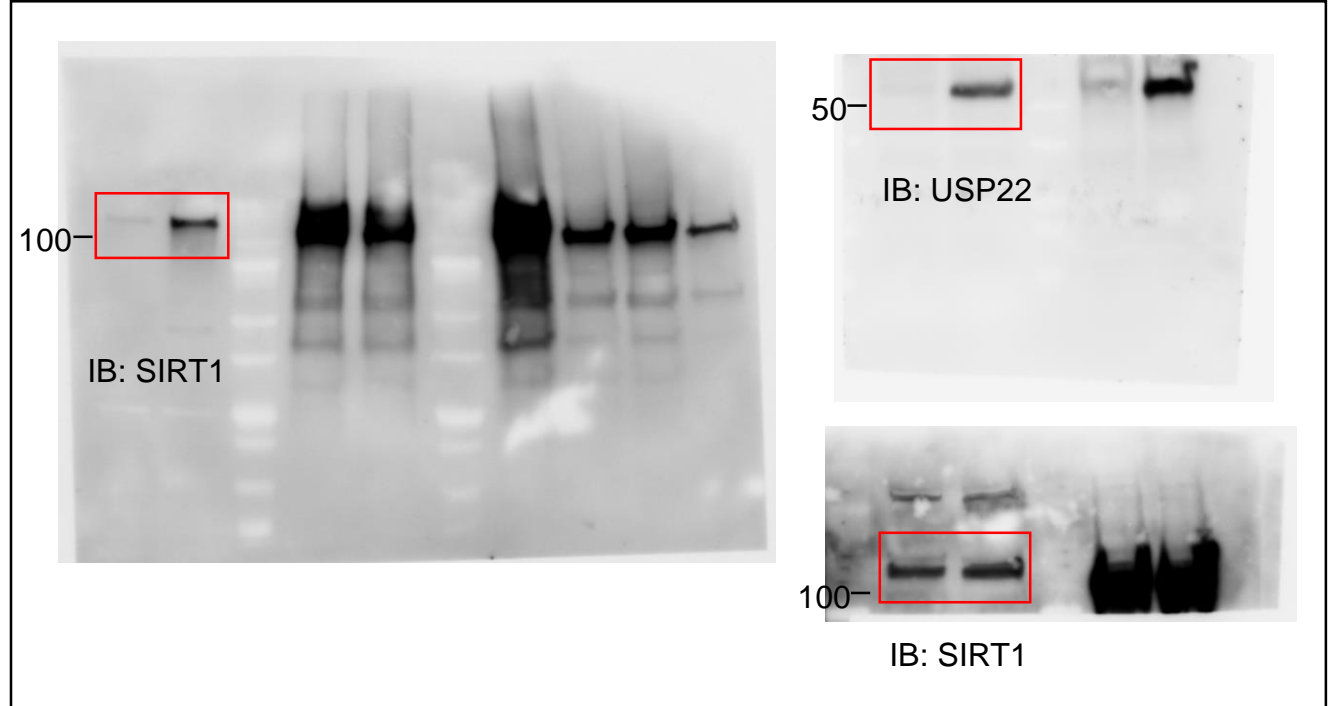

Fig. 6b (left)

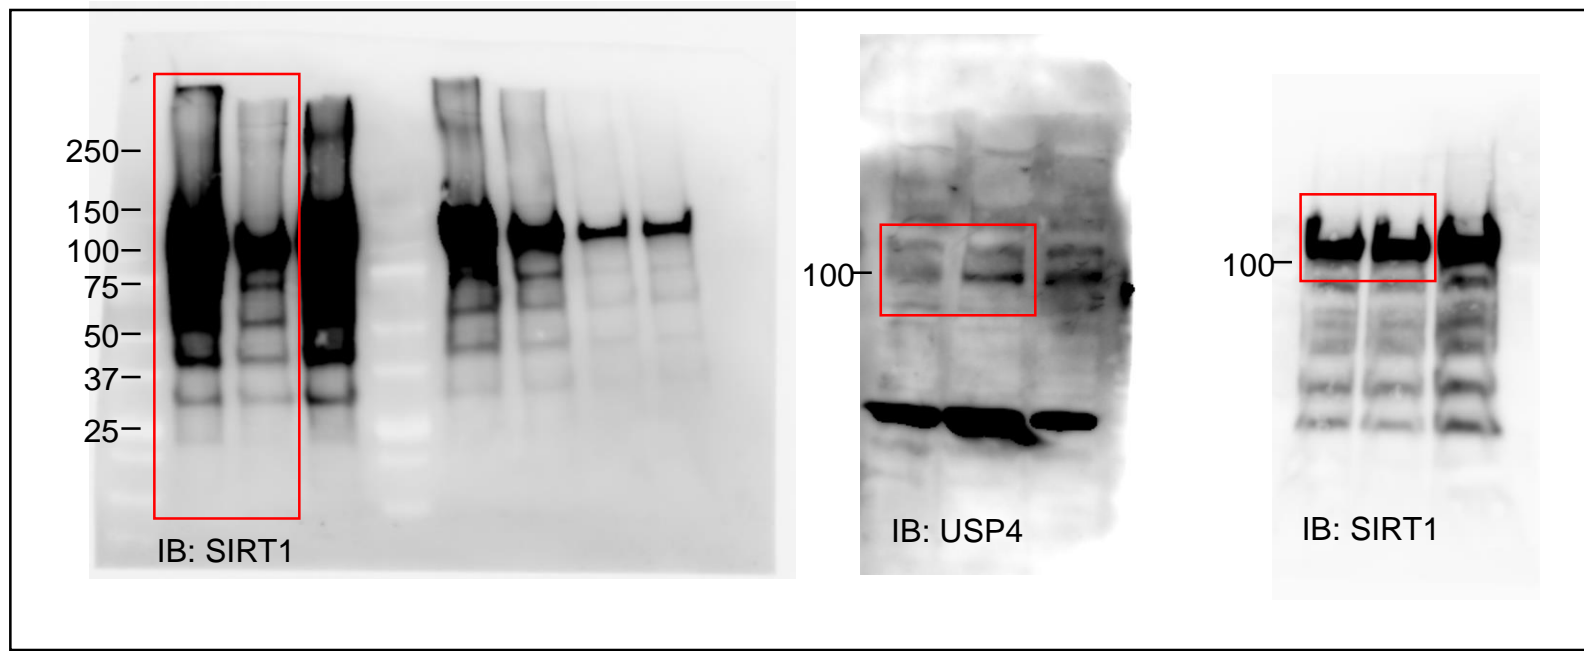

Fig. 6b (right)

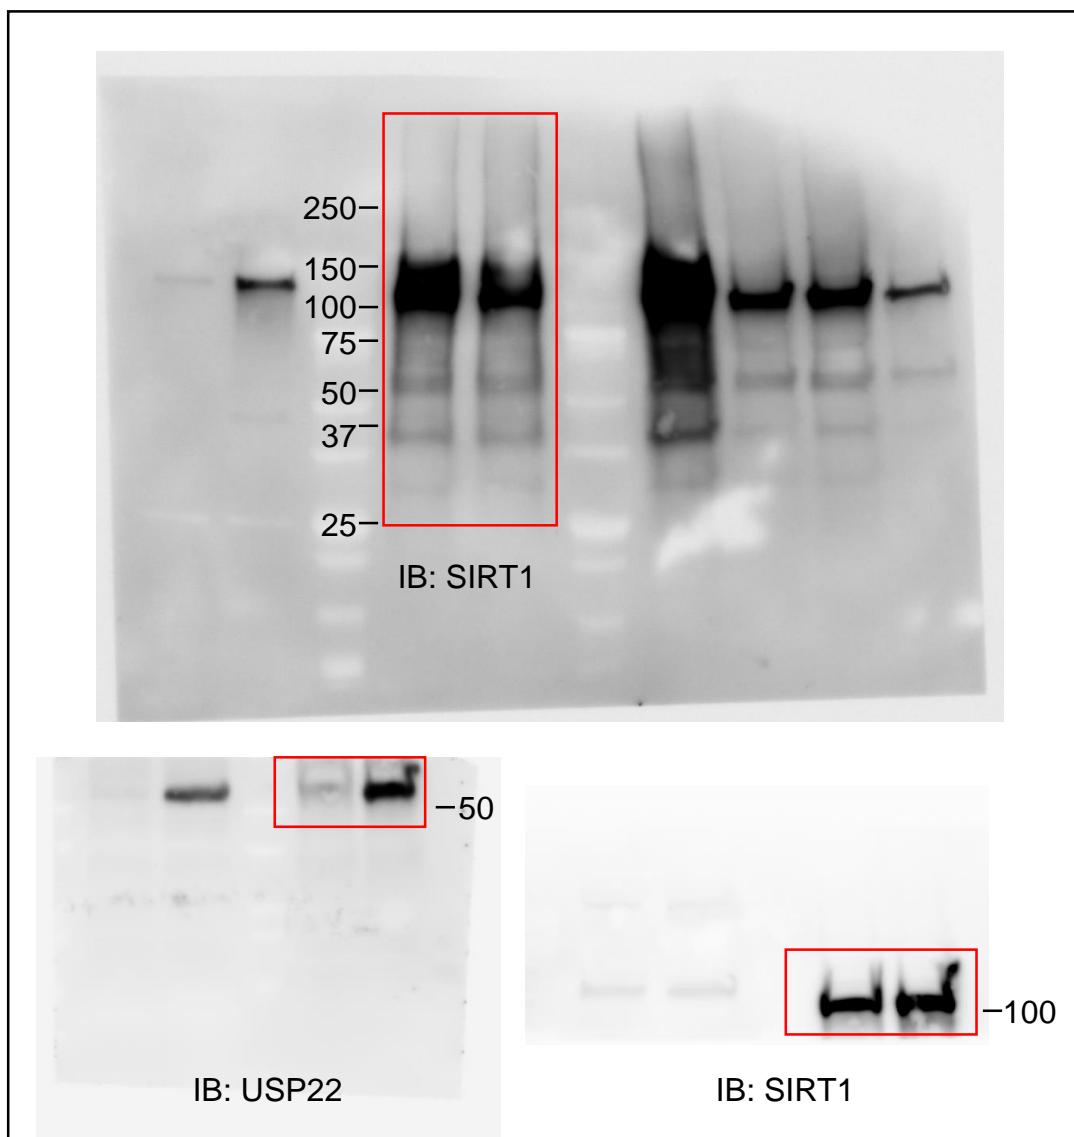

Fig. 6c

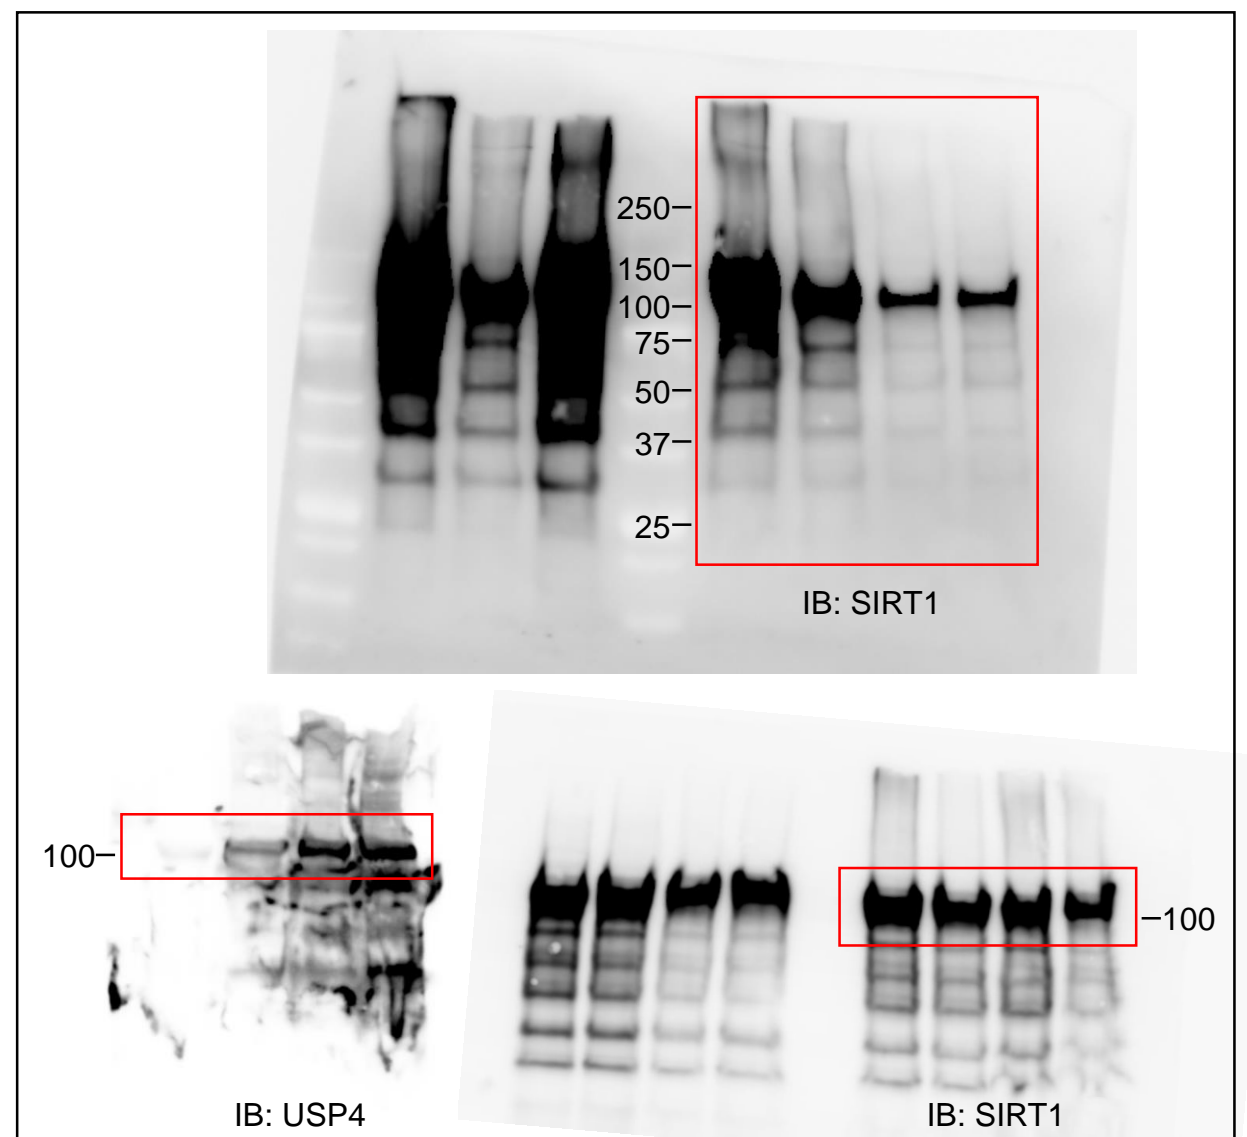

Fig. 6d (left)

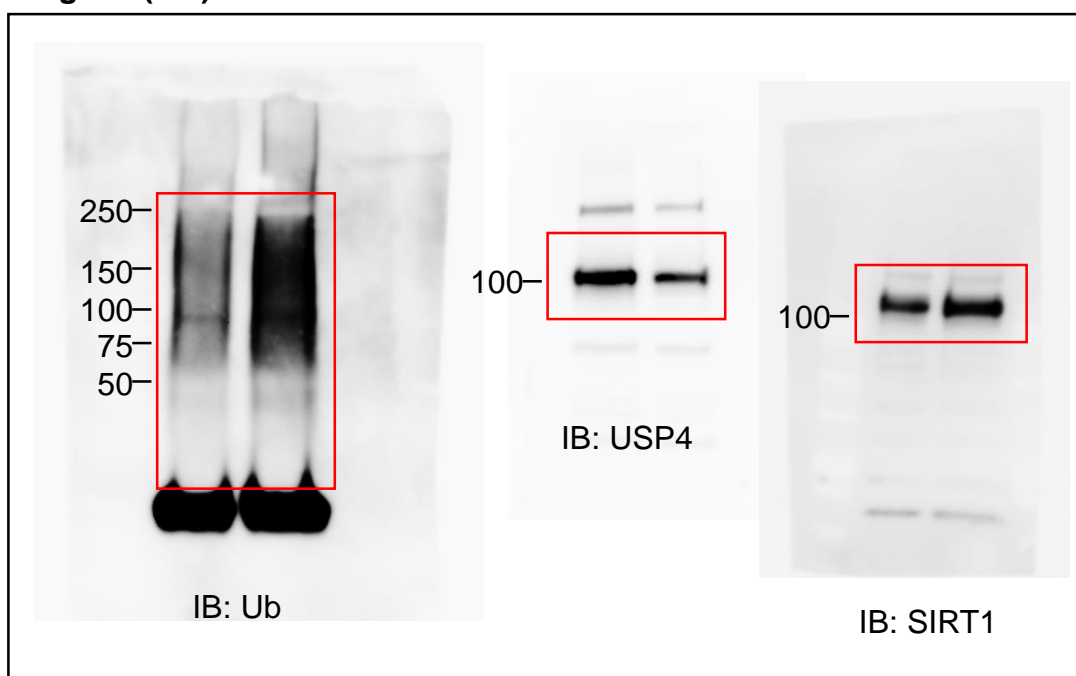

Fig. 6d (right)

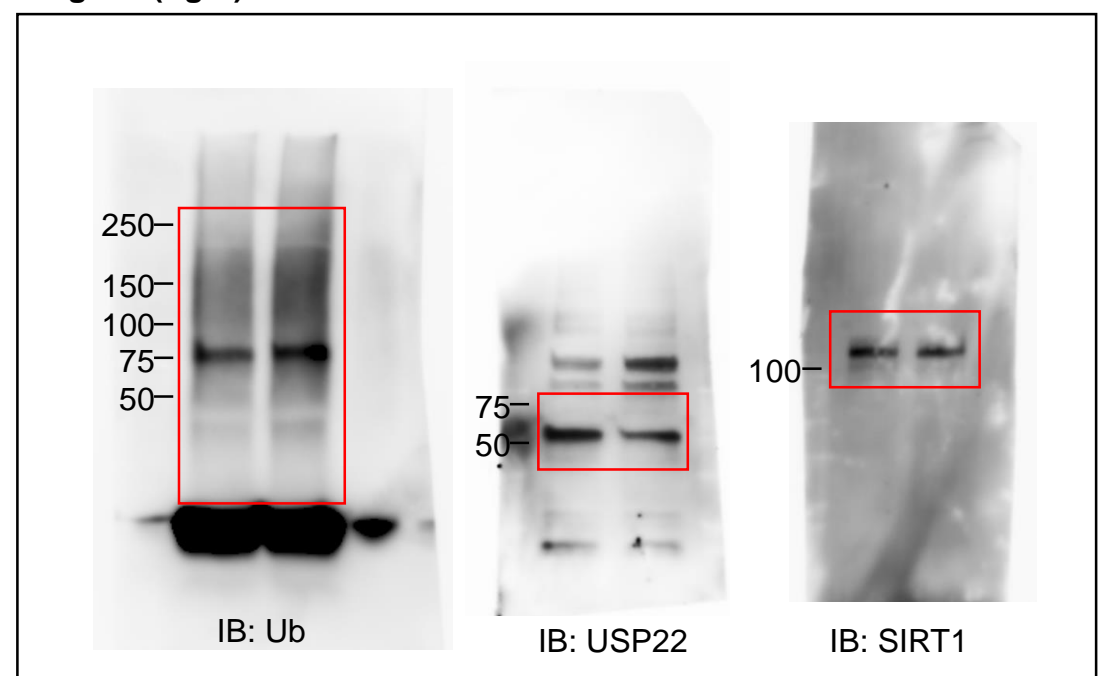

Fig. 6e (left)

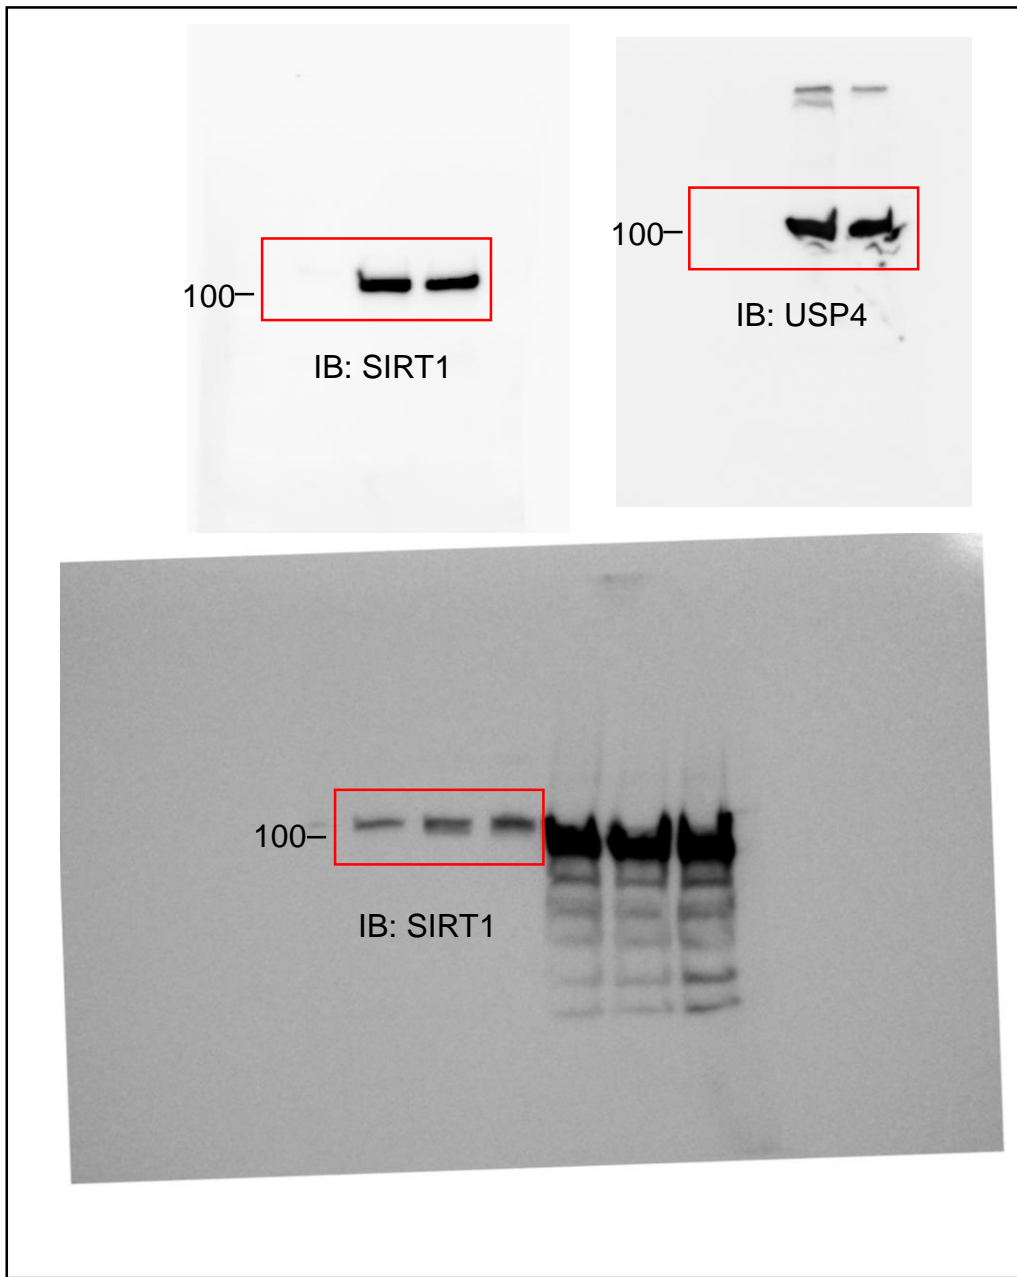

Fig. 6e (right)

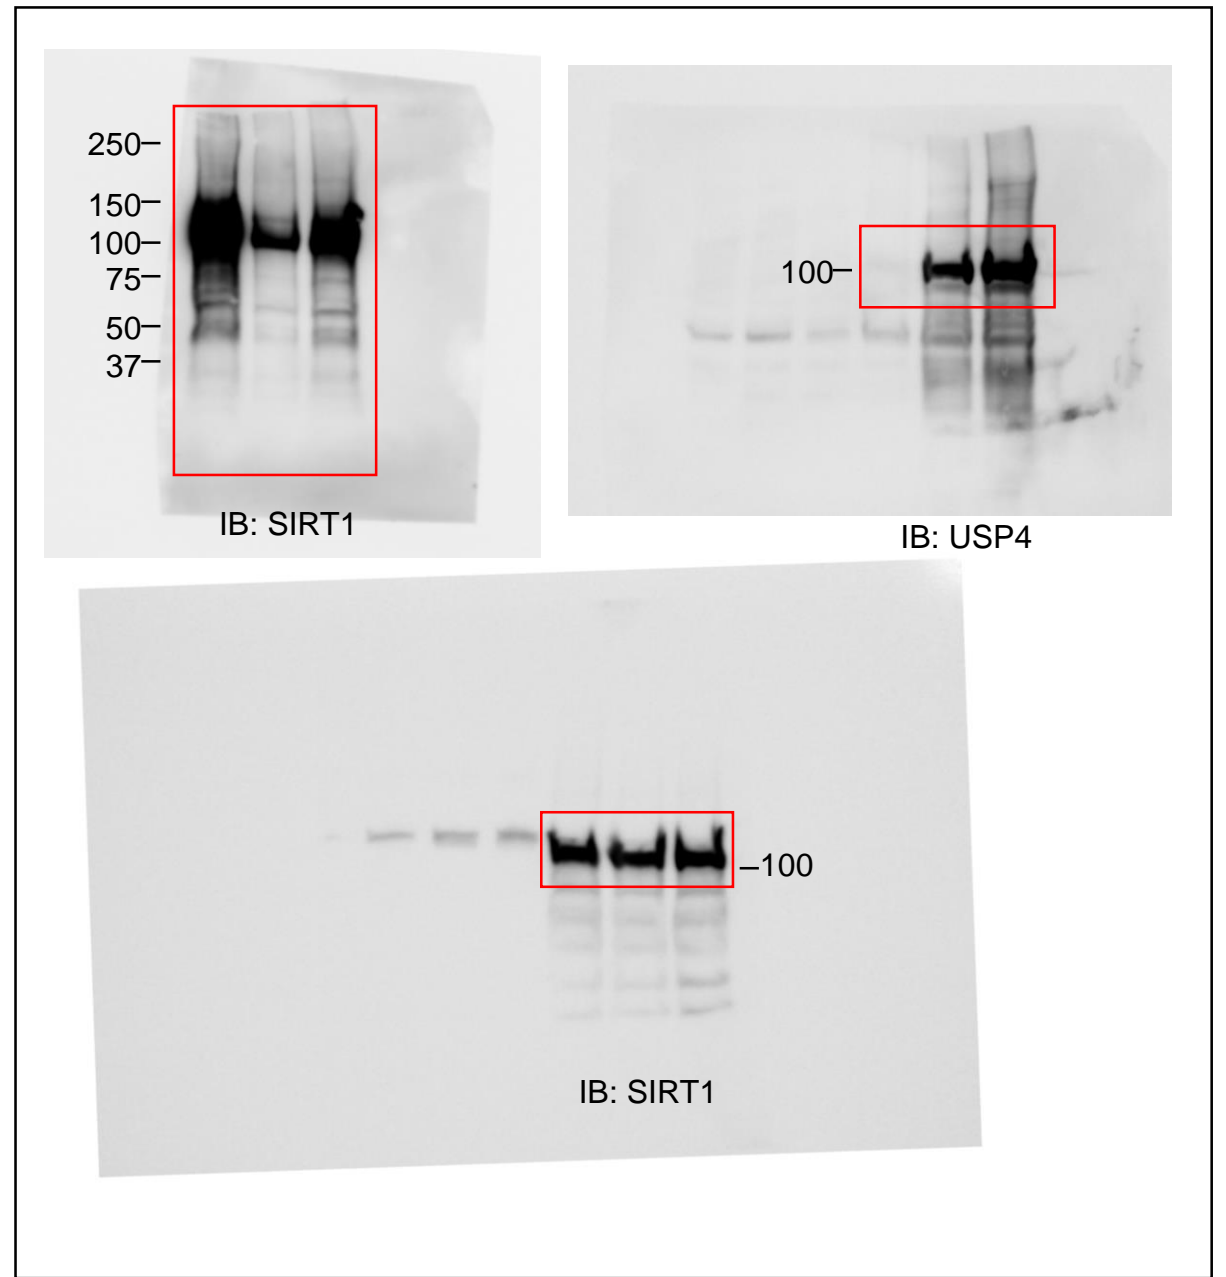

Fig. 6g

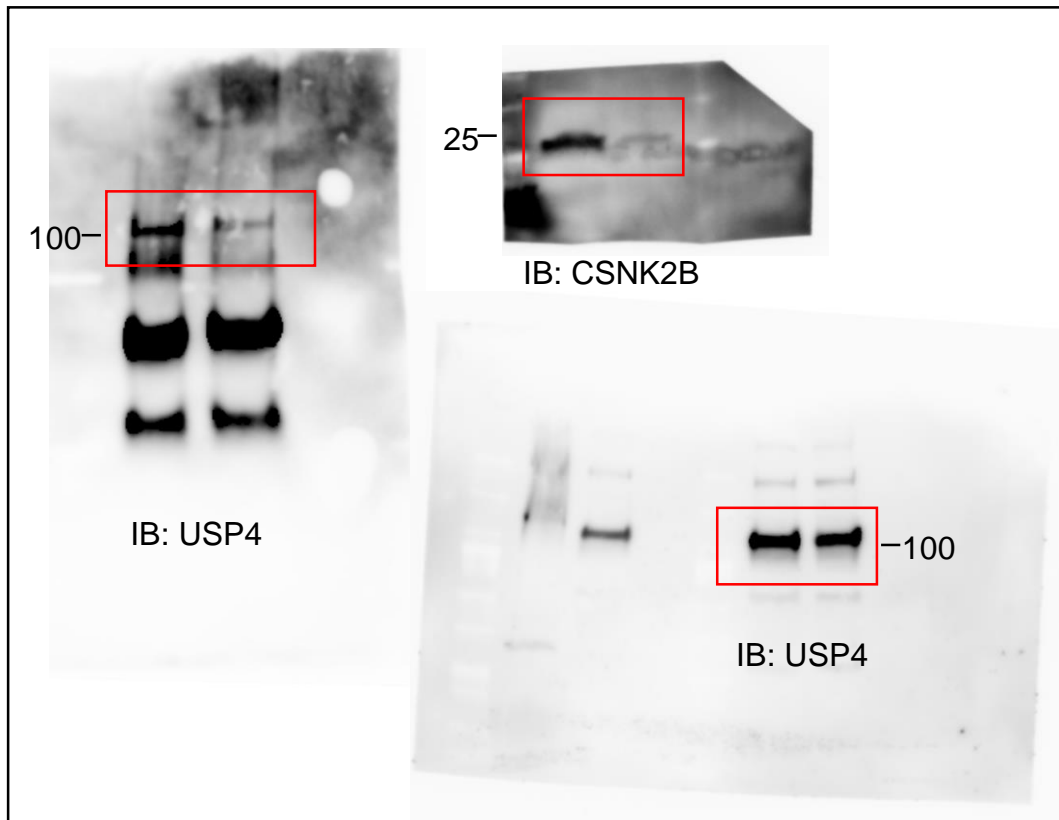

Fig. 6h (top)

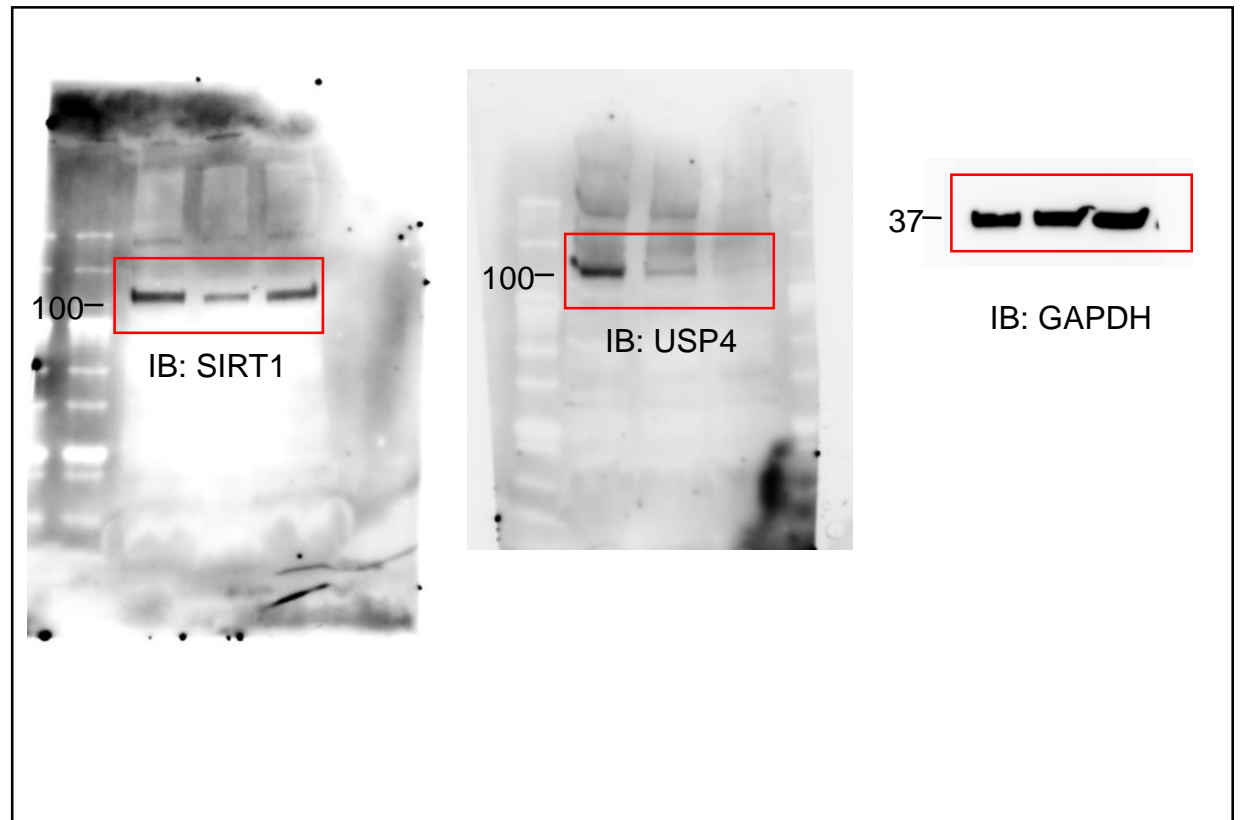

Fig. 6h (bottom)

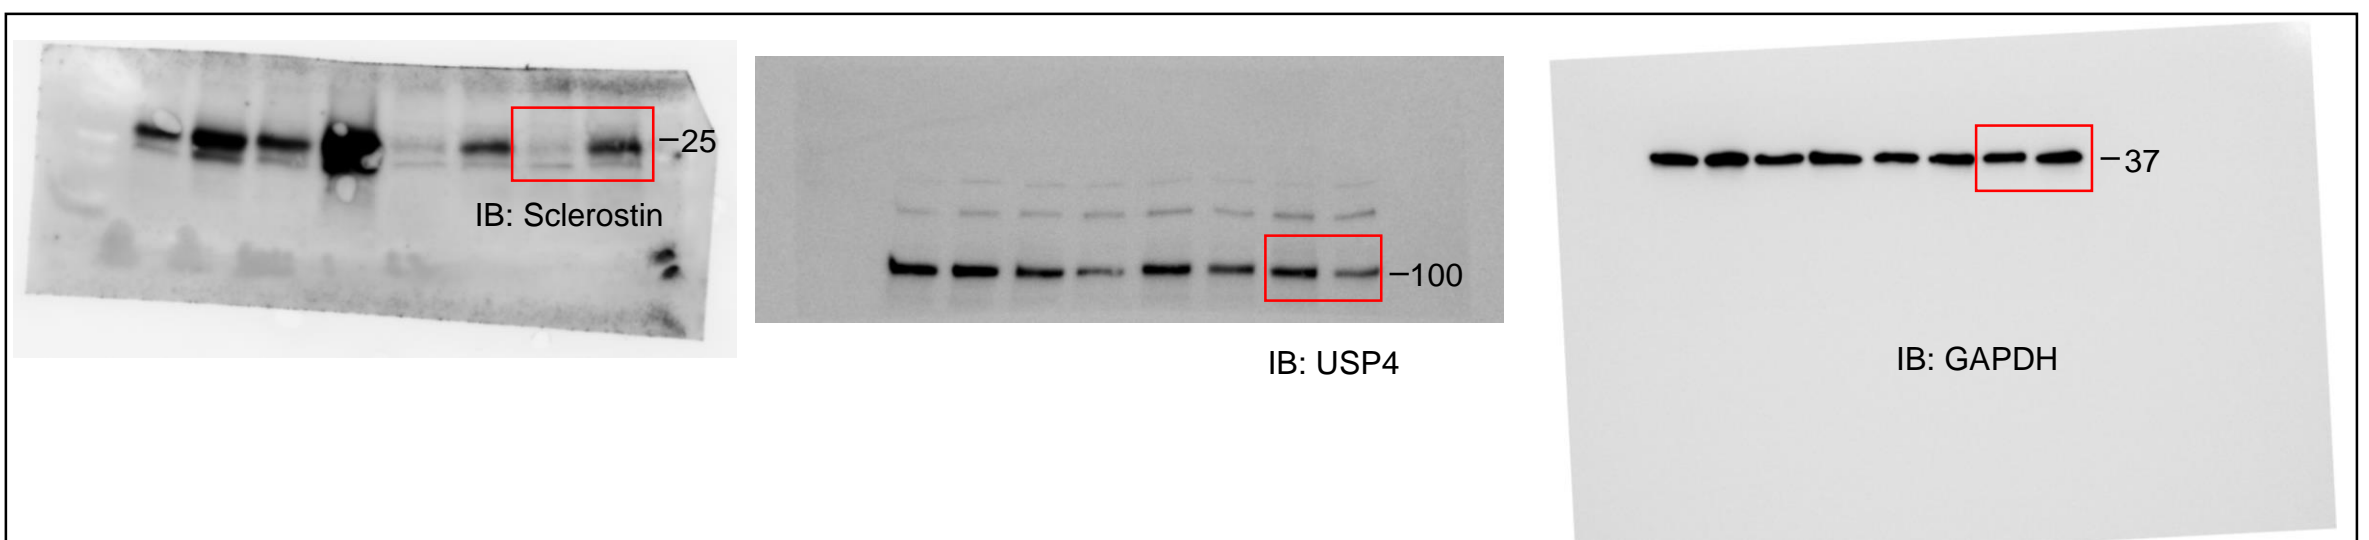



Supplementary Fig. 5a

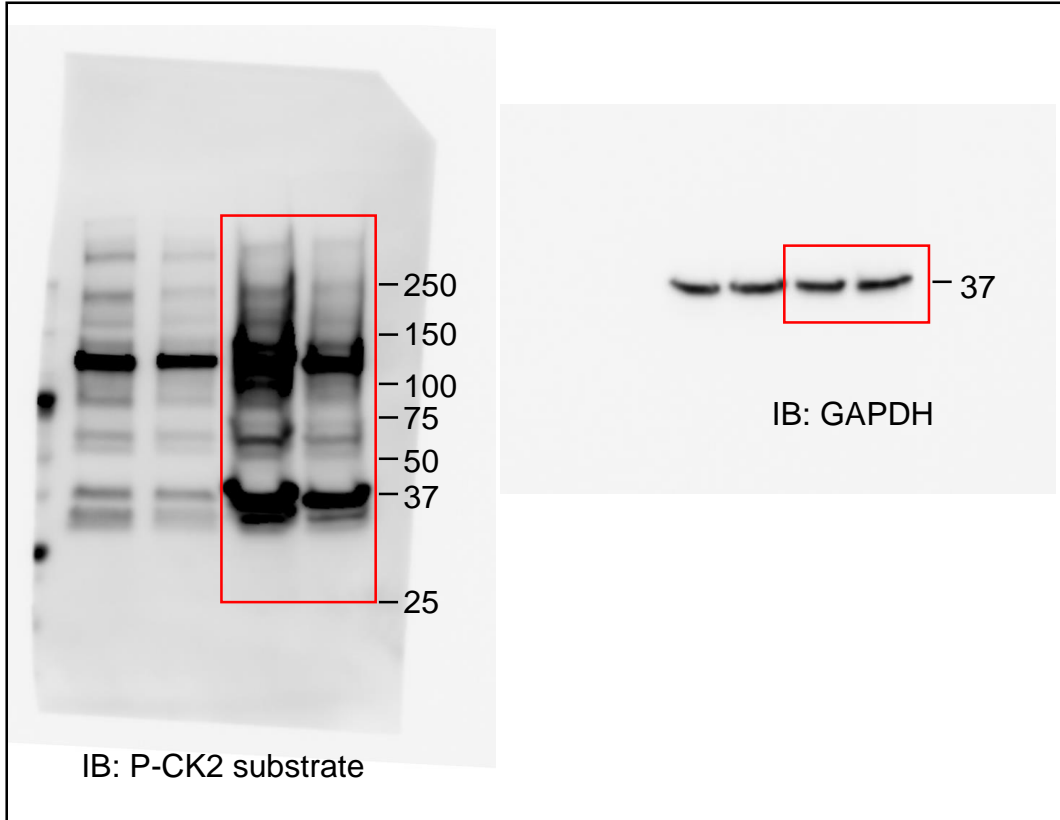

Supplementary Fig. 11a

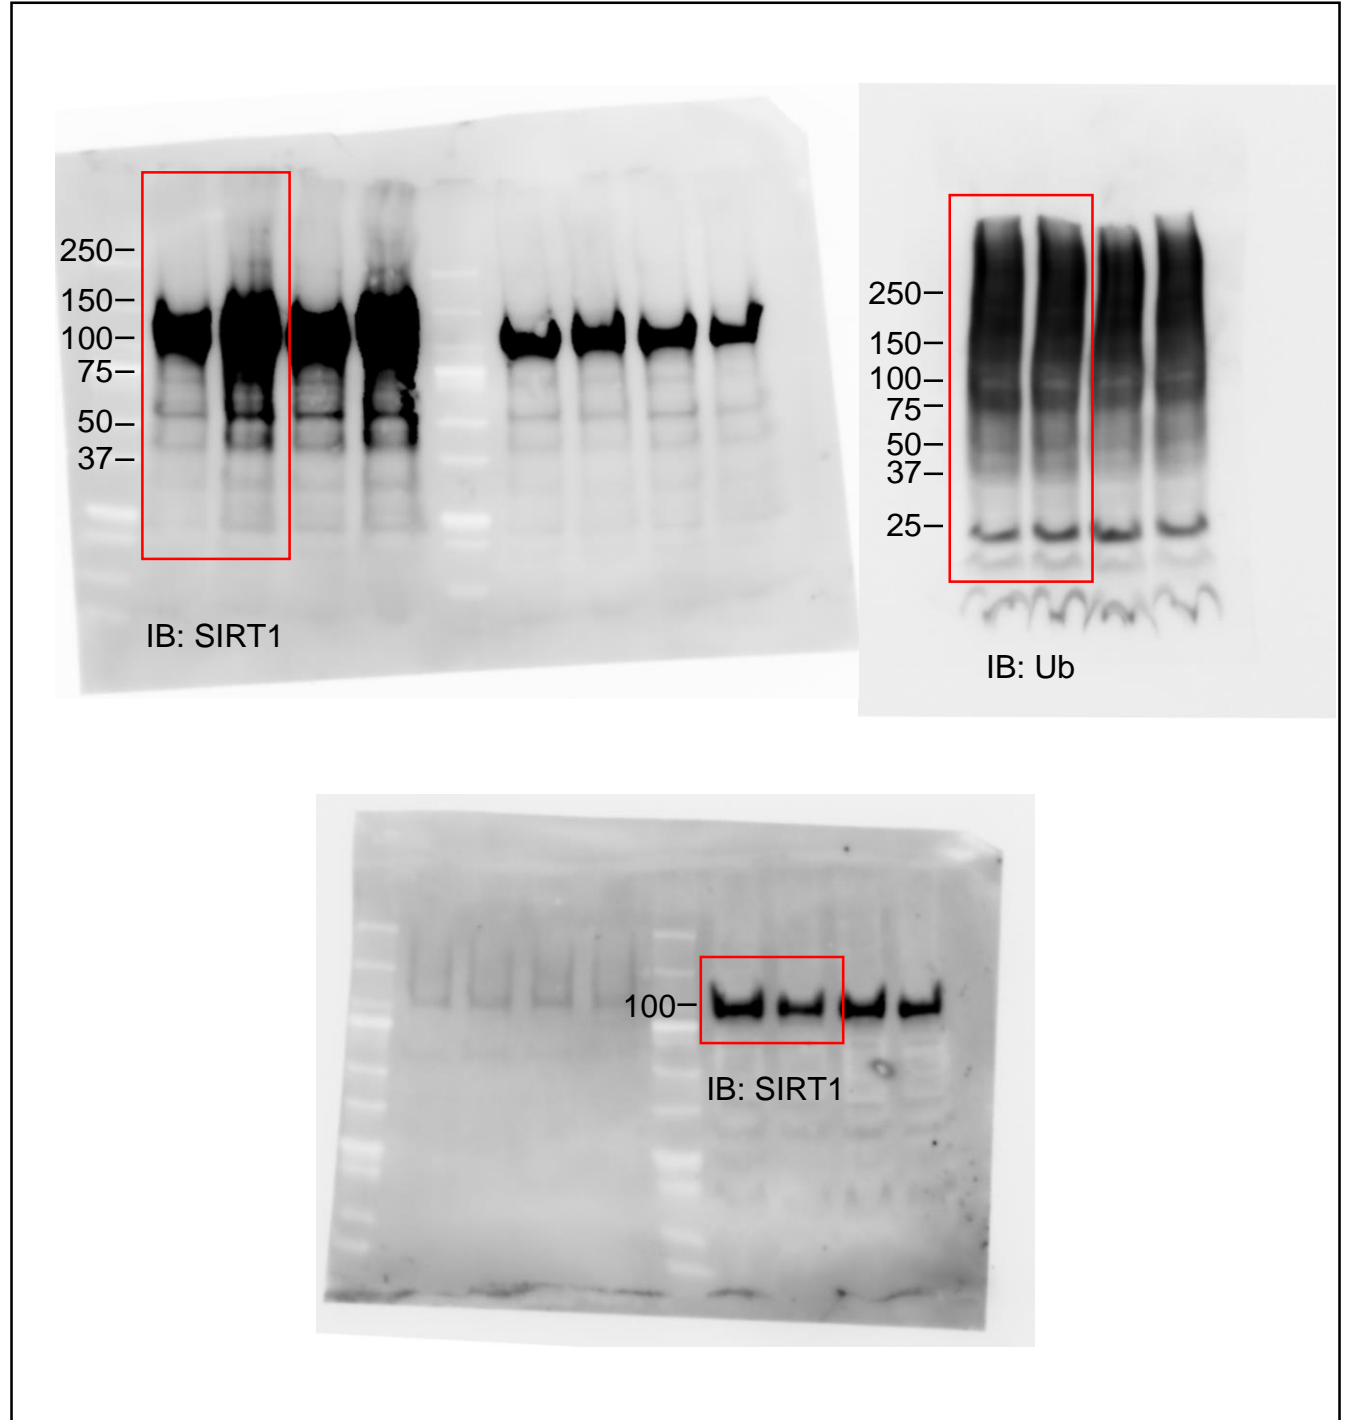

Supplementary Fig. 11b

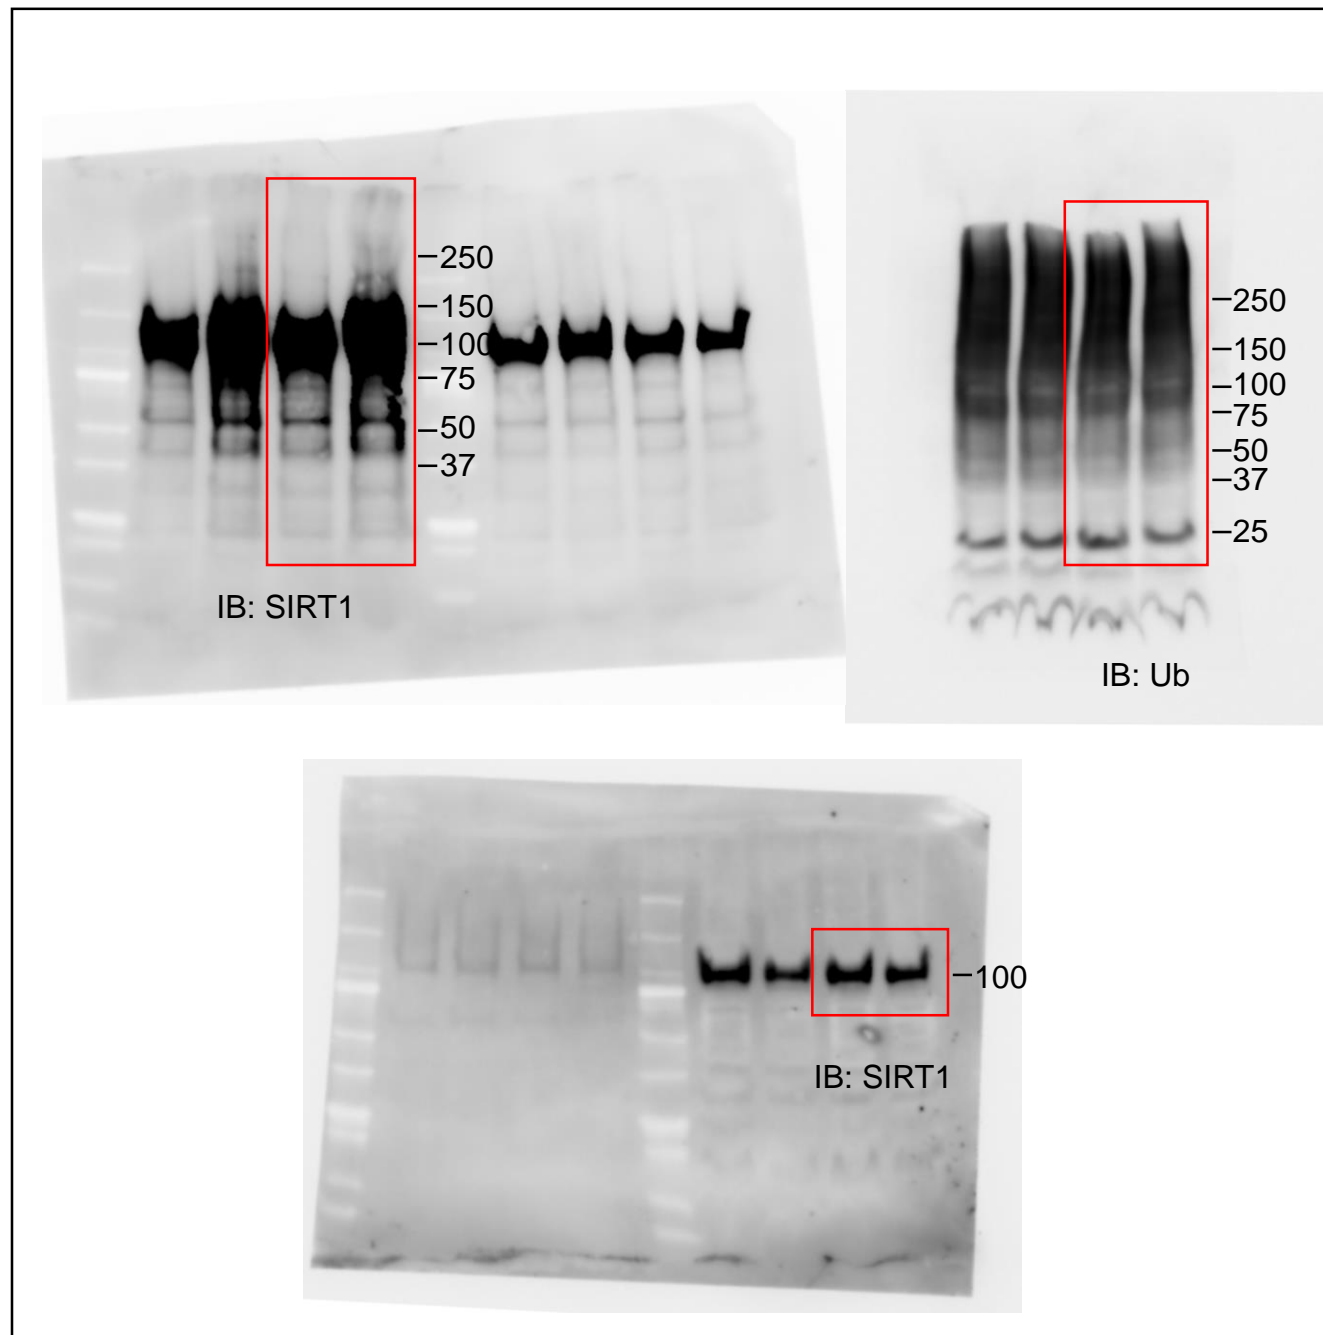

Supplementary Fig.12, IB: SIRT1 for pull-downed samples

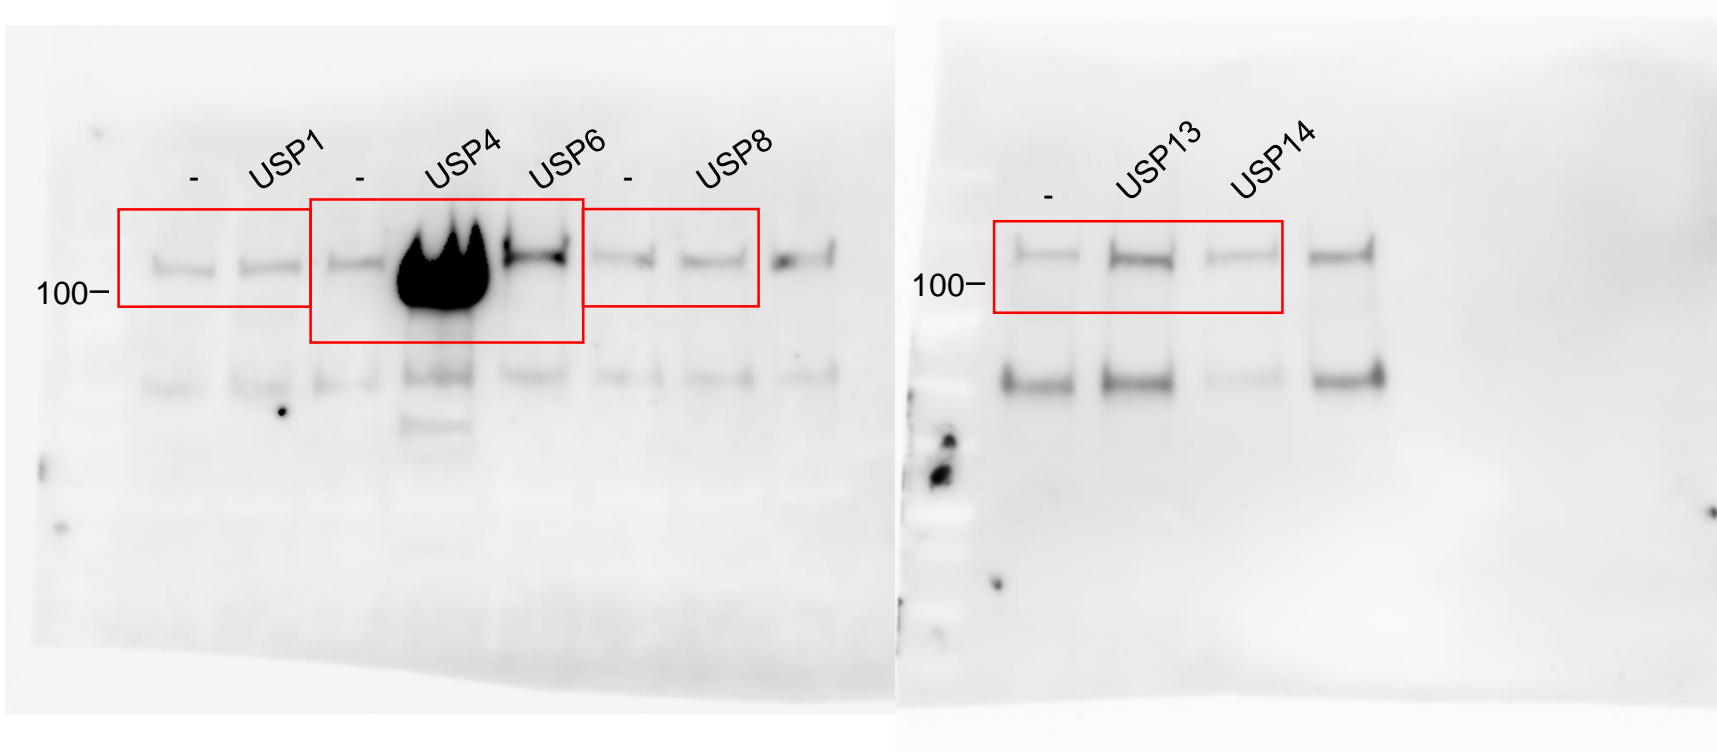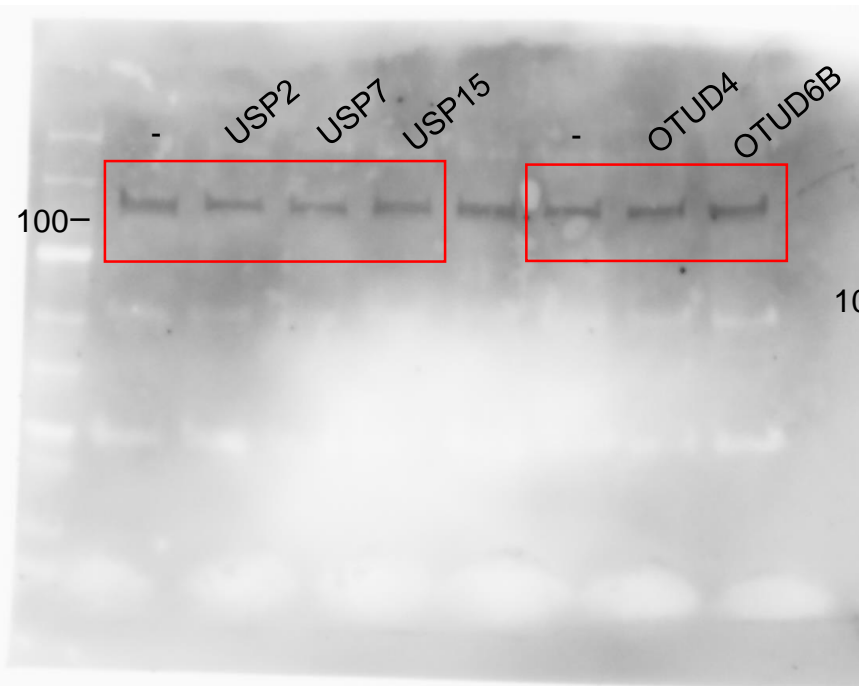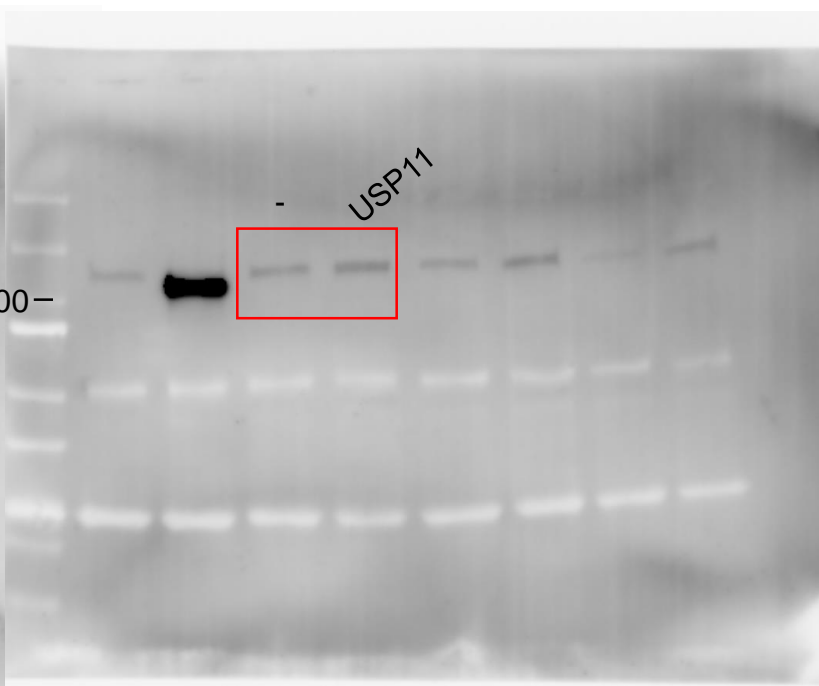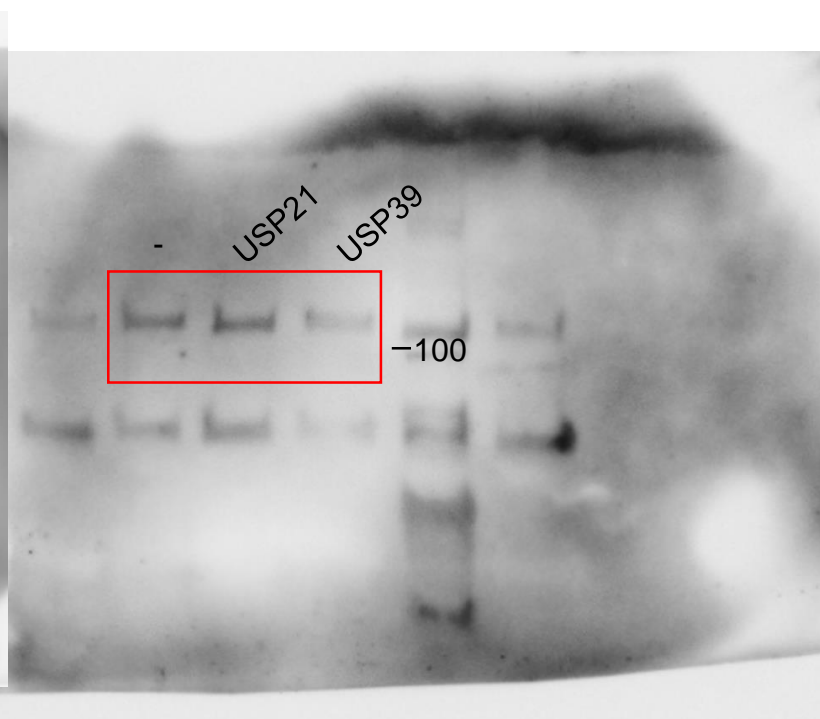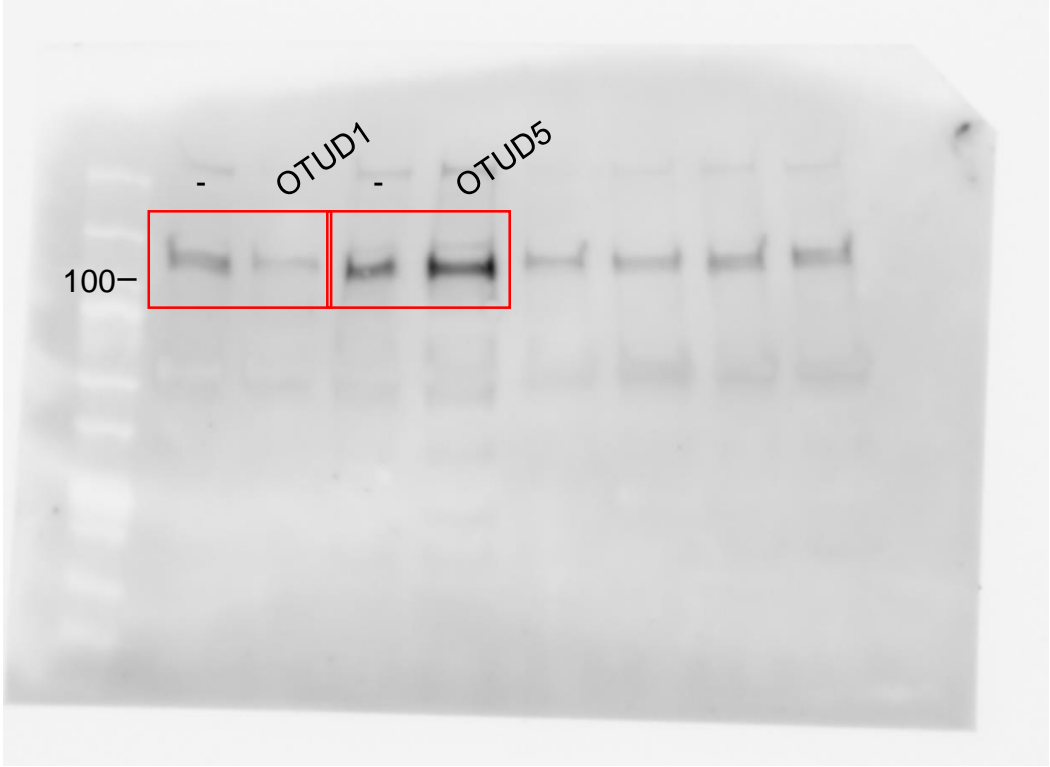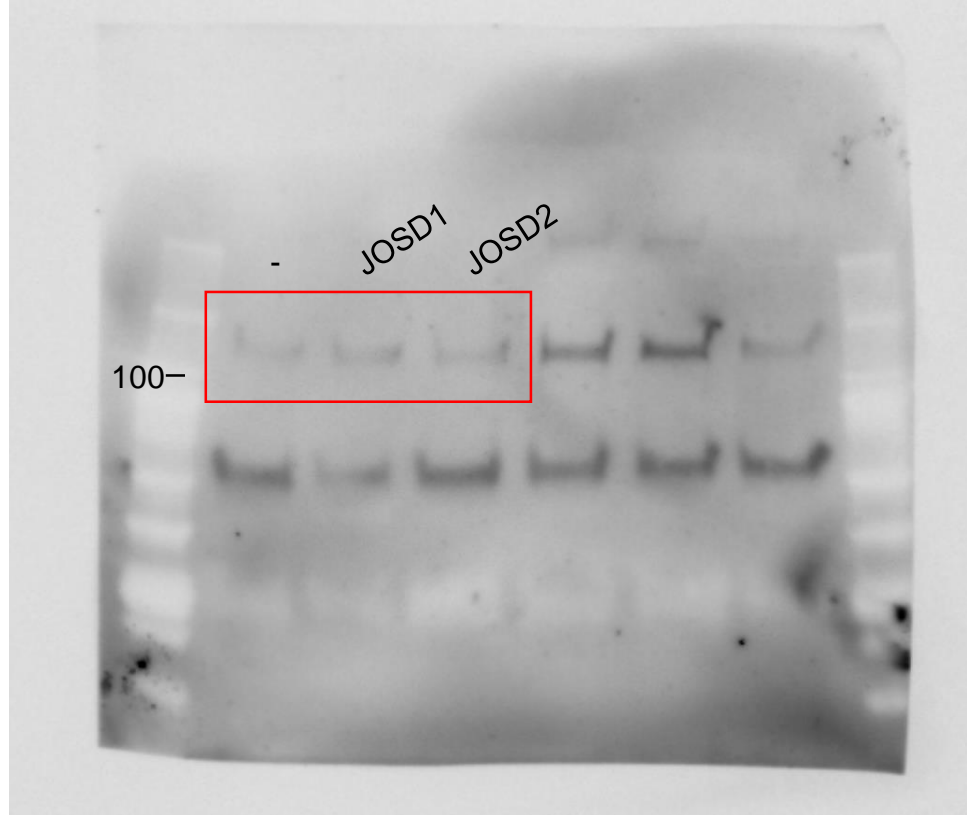

Supplementary Fig.12, IB: FLAG for input samples

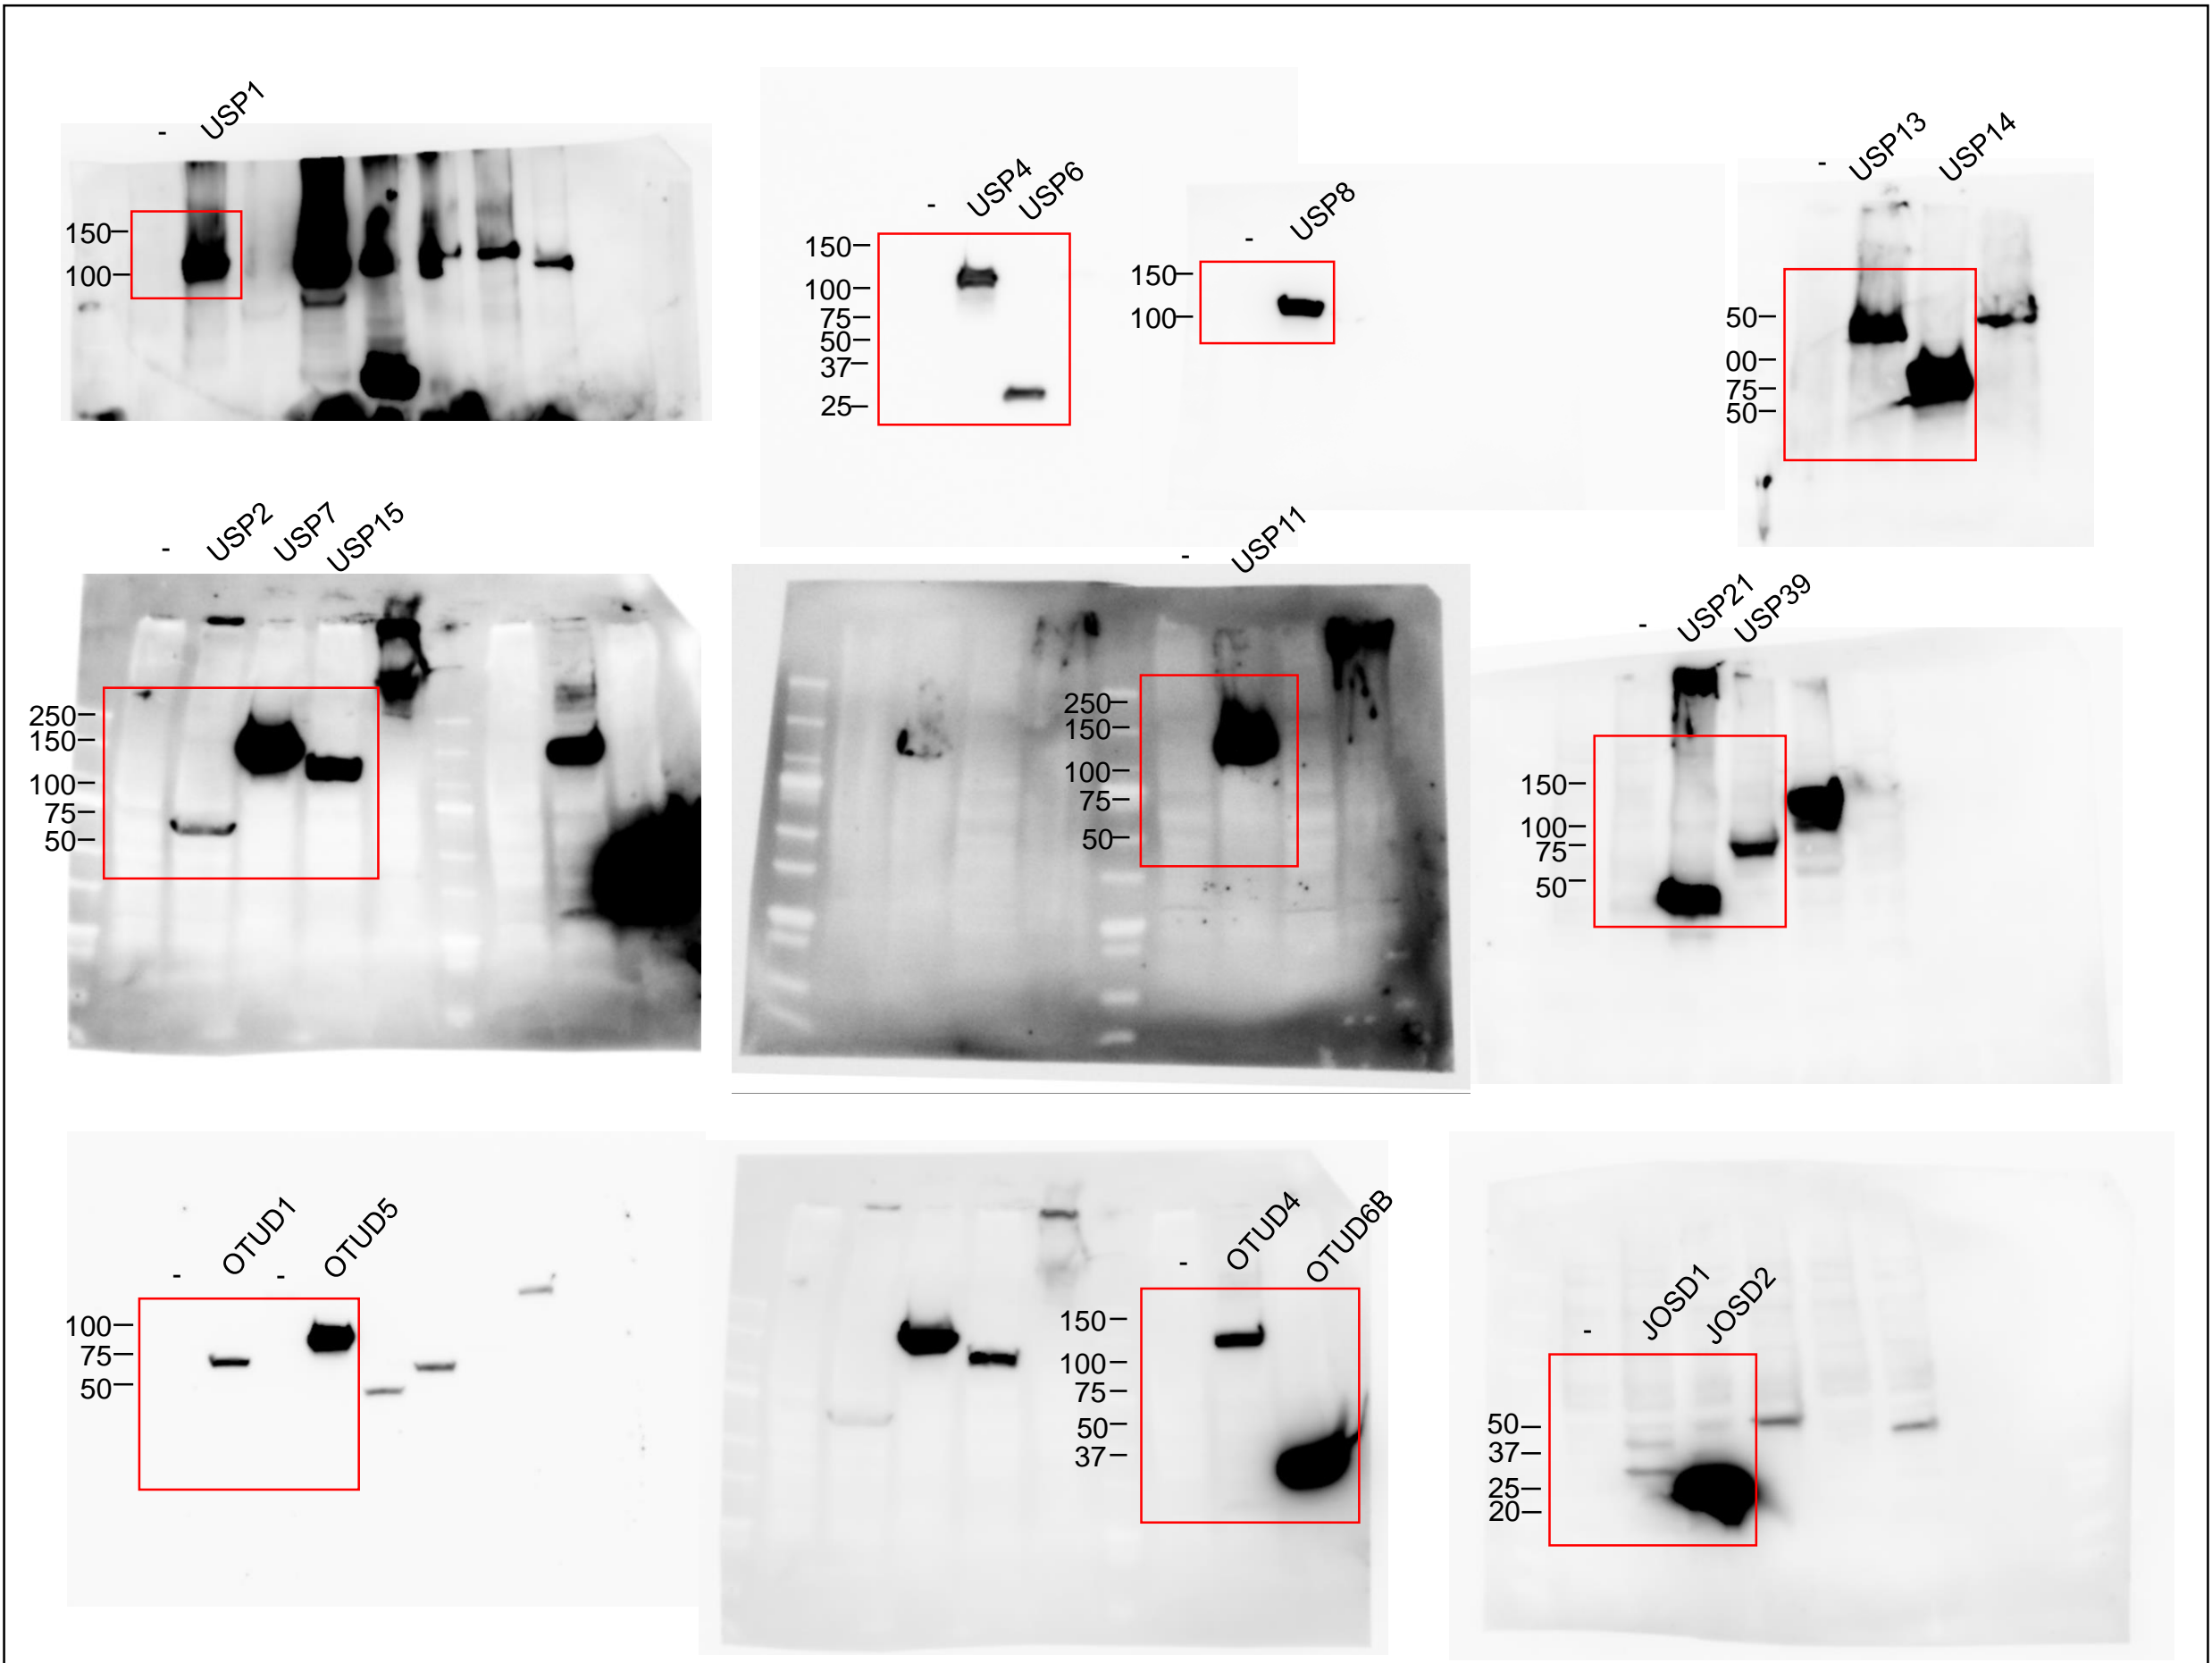



Supplementary Fig.12, IB: SIRT1 for input samples

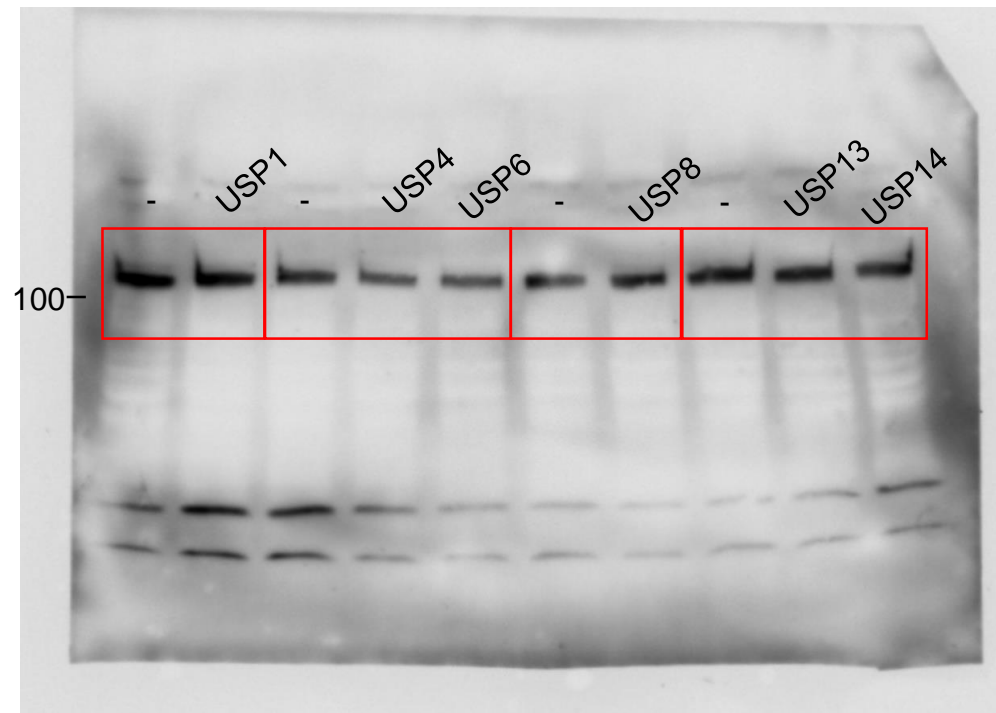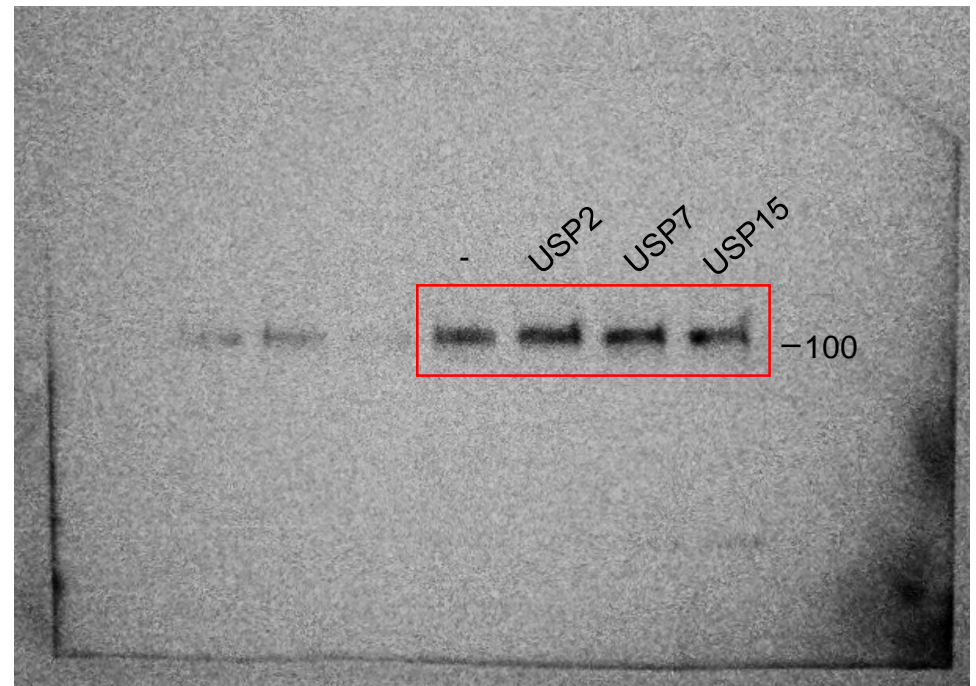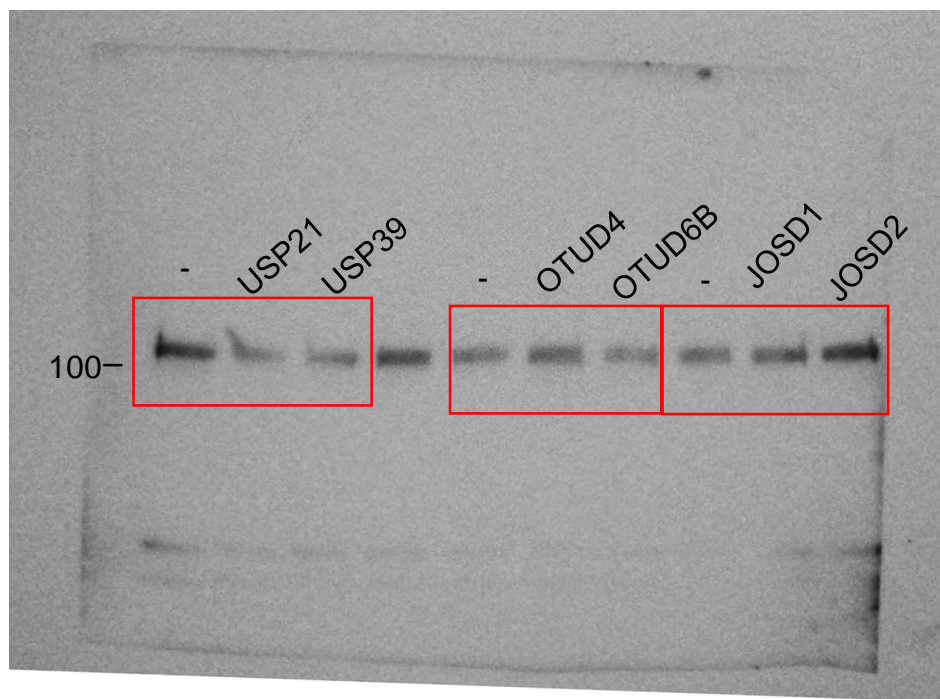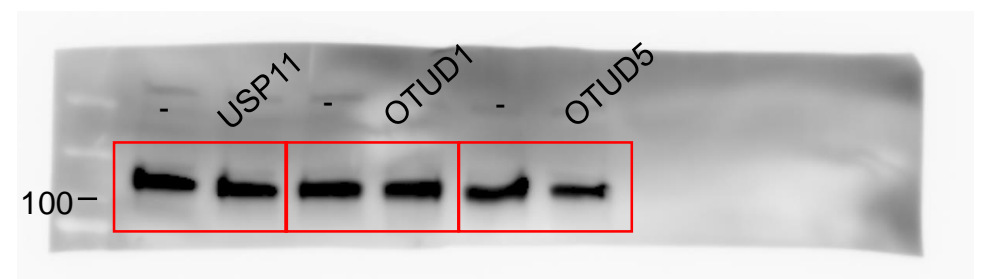

Supplementary Fig.13a

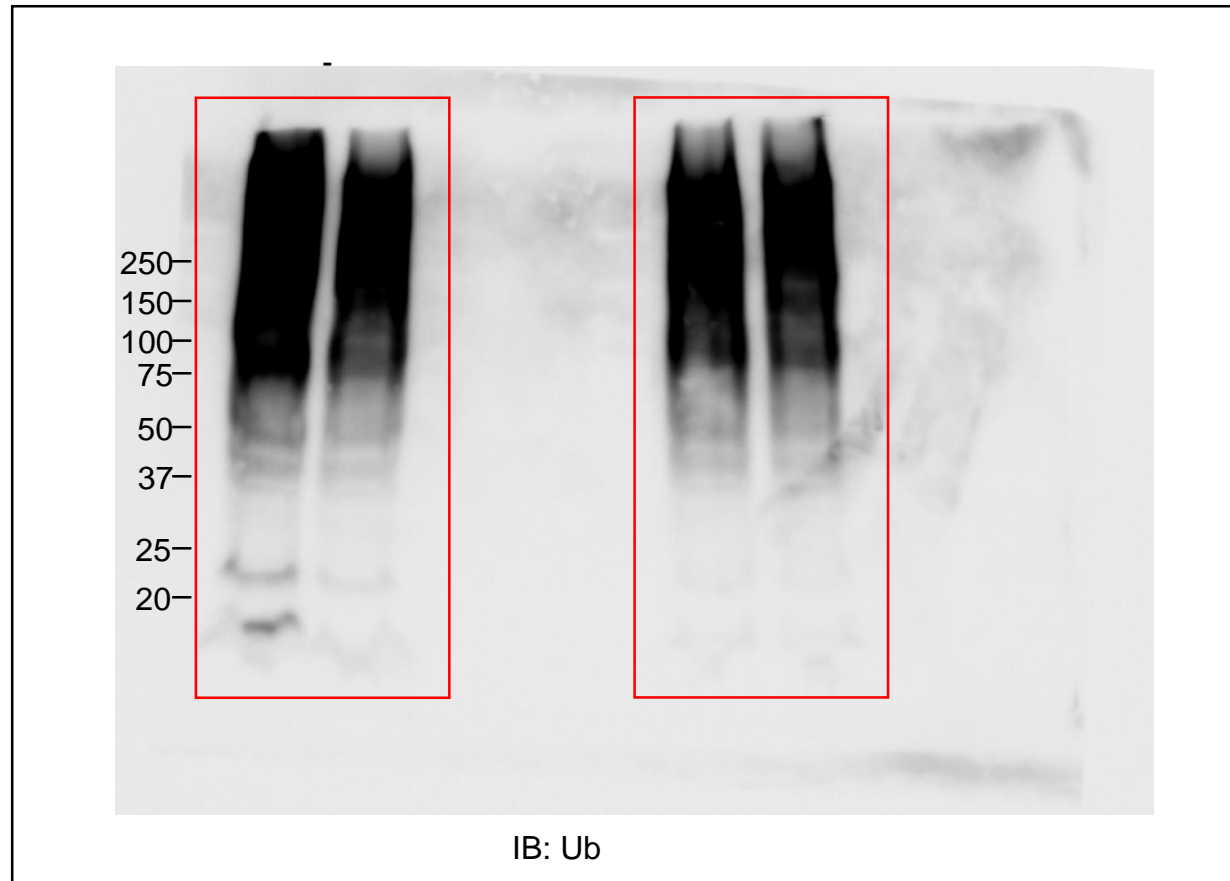

Supplementary Fig.13b

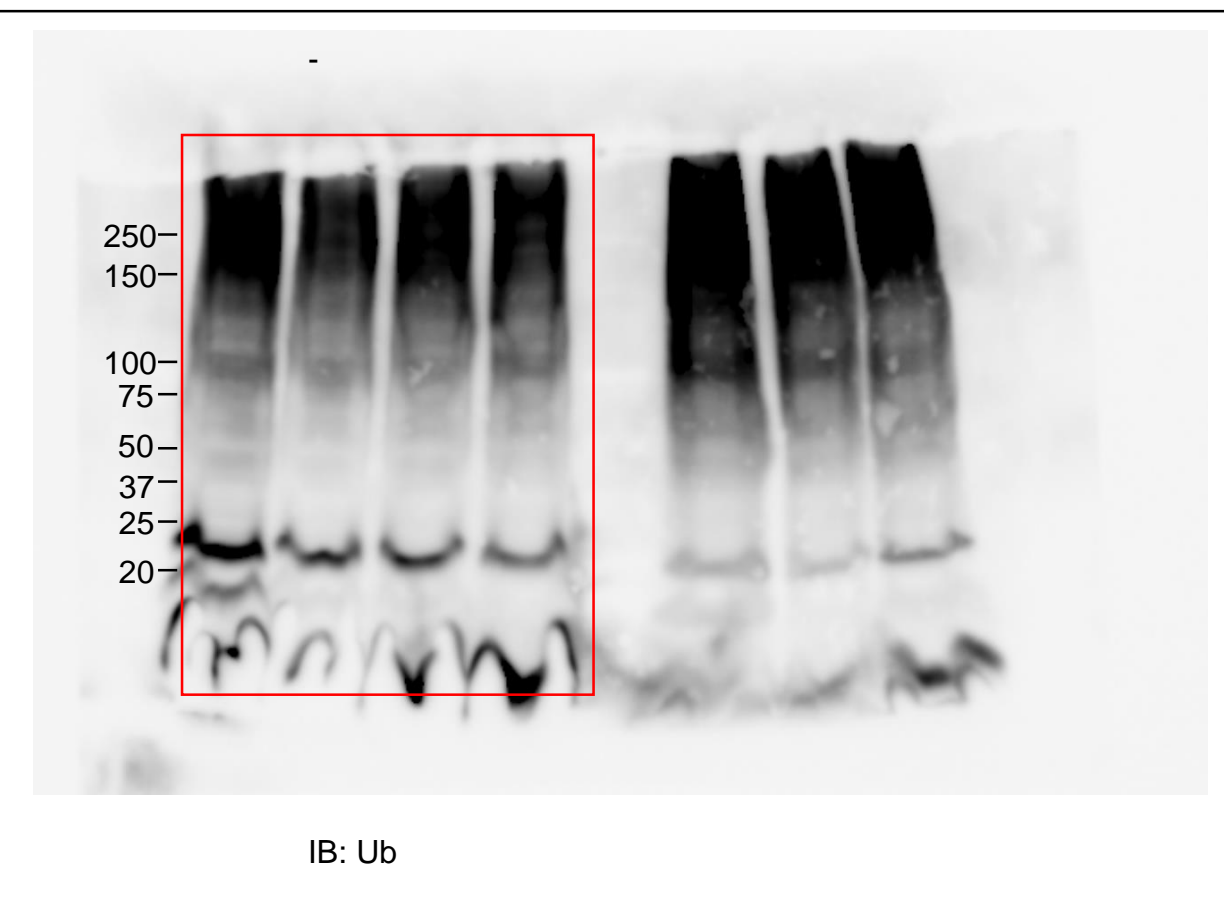

Supplementary Fig.13c

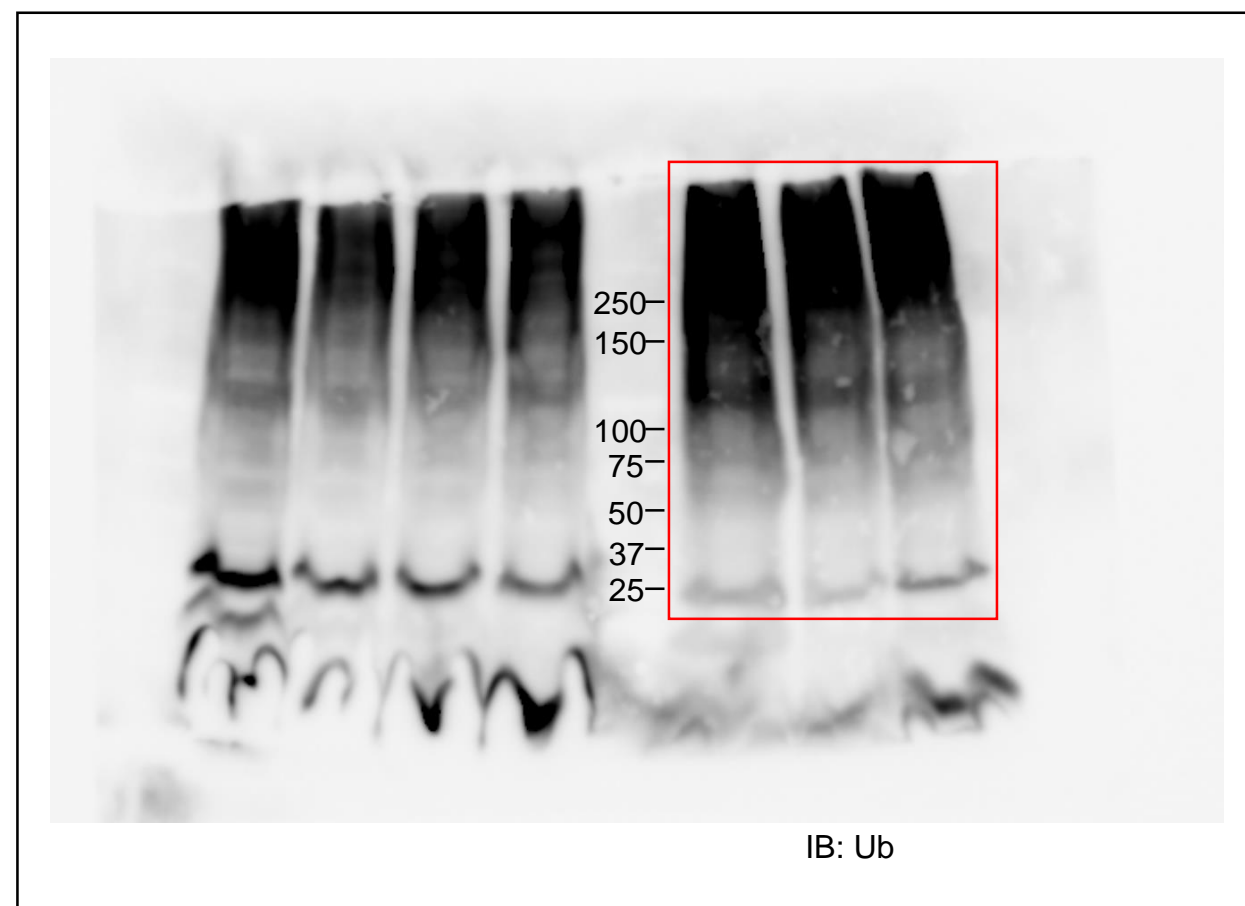

Supplement: 41418_2022_952_MOESM2_ESM.pdf [file 41418_2022_952_MOESM2_ESM.pdf]
